# Supplementary material for: A Hybrid AutoML Ensemble Integrating Conventional Learners and Gradient-Boosting Models for Multi-Outcome Prediction in ICU Patients with Pseudomonas aeruginosa
Source: Research Square preprint supplement (doi:10.21203/rs.3.rs-7125109/v1), 2025-07-23
Supplement: Supplementary file 1 [file 50690bf162644ec8e668ceed.xlsx]

## Sheet: Supplementary Data S8
Data S8. De-identified outcome variables for all 847 ICU patients
Study ID	IHM	LastPaAST	CRR	CRR-PA–Last2	ICU-LOS(days)	ICU-Death Interval (days)
68635A955B	Y	R	0.986301	1	210.734	212.704
DBFED3DF34	Y	R	1	1	57.7196	77.7302
93BA0B1C7B	N	R	1	1	22.668	NA
8AEA36DB78	N	R	1	1	30.5341	NA
01254E2528	N	R	1	1	1159.35	NA
3D67CE0BC2	N	R	1	1	19.6072	NA
6307B21473	Y	S	0.0544218	0	443.323	444.566
BE64DF5164	Y	R	1	1	20.8181	20.7403
140E55534F	Y	R	0.980392	1	1004.78	1006.25
6532C5639C	N	S	0	0	26.2723	NA
A9D45FF1FF	N	R	0.418605	1	51.1339	NA
10343E80B3	N	S	0	0	85.4603	NA
D6B8619BC8	N	R	1	1	9.7113	NA
3F3DD29BCB	N	R	1	1	17.2101	NA
C61A383F4C	Y	S	0	0	10.0447	9.99058
53A67FA9F1	N	R	1	1	14.9335	NA
F84A032A83	N	R	0.622951	1	75.9863	NA
5B5EDA2F33	N	R	1	1	8.24933	NA
5F25608F1E	Y	R	1	1	218.827	229.957
F253B387C6	N	R	1	1	37.4644	NA
9CD7B40F84	N	R	1	1	24.7905	NA
82948DC66B	Y	R	0.651163	1	121.459	67.3832
2D183C21D8	N	S	0.333333	0.5	20.6744	NA
918EF09A22	N	R	1	1	10.9917	NA
7F7FF08009	N	S	0	0	28.908	NA
5B31B34152	N	R	1	1	23.5934	NA
22C320310F	N	R	1	1	7.15549	NA
F7016EC9E3	Y	R	1	1	188.117	205.255
0450A63A55	Y	R	1	1	11.9939	11.9515
C7DFB6C643	N	S	0	0	0.798252	NA
771A517007	N	R	1	1	22.453	NA
67861C26CE	N	S	0	0	6.88538	NA
8C4E7CAC80	N	R	1	1	90.8338	NA
99C3775FD2	Y	R	1	1	54.4314	114.003
0BECCD8559	N	R	1	1	28.6756	NA
762C769B4A	N	R	1	1	61.6342	NA
DA32E80363	Y	R	1	1	29.7233	28.9547
5047797445	N	S	0	0	31.4782	NA
3751657CBB	Y	R	1	1	37.8949	56.4256
F53659A35D	N	R	1	1	9.09119	NA
53818BB312	Y	R	1	1	3.28769	3.25852
5FA764FF0F	N	R	1	1	21.7207	NA
4C45143E83	N	R	1	1	16.3957	NA
1A86F9028B	N	S	0	0	89.1164	NA
1F504B9912	N	S	0	0	13.6922	NA
8EB0EB04D4	N	R	1	1	18.7409	NA
82D42DD6AE	N	R	0.733333	1	144.125	NA
A8AA0EEBAD	N	R	1	1	29.6516	NA
BD428E7307	N	R	1	1	1.95859	NA
85669BF963	N	R	1	1	53.1558	NA
4BAAEC1A72	N	R	1	1	25.149	NA
96DC72DEA7	N	R	1	1	19.71	NA
CAA9E7779B	N	S	0	0	30.055	NA
A162BACE91	N	R	1	1	9.61491	NA
AAB92D743C	N	R	1	1	13.9563	NA
6324EFE9D4	N	R	1	1	8.33763	NA
0E45F56405	N	R	1	1	59.1541	NA
1DE2A165C0	Y	R	0.667845	1	433.565	874.619
5DA6115FC5	N	R	1	1	49.2138	NA
2BA677C031	Y	R	0.358209	1	285.84	286.081
C28B9670C3	N	R	1	1	28.4803	NA
302CB809E7	Y	R	1	1	70.6315	73.5313
94D64E73A4	N	R	1	1	2.77669	NA
53E82D25F5	N	R	1	1	10.8464	NA
548A7C84CE	N	R	1	1	17.0619	NA
A4A94B17FF	N	S	0	0	42.4023	NA
A17AA02215	N	R	1	1	38.7617	NA
2AC8B6710F	N	S	0	0	21.8604	NA
C94DB2063F	N	S	0	0	13.7214	NA
27D0EC8069	N	R	1	1	51.5277	NA
58BE3AC5D2	N	R	1	1	11.7061	NA
5E5C1AFA23	N	R	1	1	16.1899	NA
C025A89AED	N	R	1	1	16.2897	NA
10C7F1A09B	N	S	0	0	2.83882	NA
8EE17983CC	N	R	1	1	24.7718	NA
F2EC10B583	Y	R	1	1	17.4146	17.3681
4B453C92AB	N	R	1	1	3.62898	NA
8ABB43F4FA	N	R	1	1	20.9491	NA
3DDEC8D49F	Y	R	0.0909091	0.5	3.50715	3.22729
E33E42658C	N	R	1	1	31.4768	NA
870DF85F84	Y	R	1	1	13.7117	13.4846
E07CDD598C	N	R	1	1	42.0499	NA
A48B810033	N	R	1	1	18.7531	NA
16A79BA9CA	Y	R	1	1	0.690255	2.0427
7DFBF24ECB	N	S	0	0	2.58753	NA
5FECD13F58	N	R	1	1	10.9654	NA
6390E06026	N	R	1	1	6.87457	NA
59D5858F24	N	R	0.659574	1	33.8237	NA
10376343B3	N	R	1	1	16.563	NA
D8D7D02167	N	R	1	1	9.86328	NA
1073F91907	Y	R	1	1	23.6412	23.6168
3B2C633E88	N	S	0	0	13.4205	NA
ABBE1E141B	N	R	1	1	38.8456	NA
F390ED03B7	N	R	1	1	28.9187	NA
92E73DD8C5	Y	R	1	1	54.7646	56.4924
87370C81D5	N	R	1	1	31.6758	NA
122B68593B	Y	R	1	1	14.9955	15.0578
9CFC21BB1A	N	R	1	1	18.4578	NA
23197DA797	N	S	0	0	80.8779	NA
AF7B076858	N	R	1	1	25.5037	NA
35DC30584D	N	R	1	1	13.9036	NA
1DA3B24549	N	R	1	1	11.6634	NA
A8949A97A3	N	R	1	1	6.97922	NA
1.40405e+96	N	R	1	1	49.0223	NA
3538350AF3	Y	R	1	1	3.9765	3.95498
E58AB7414B	N	S	0	0	10.7495	NA
B2880A5E7E	N	R	1	1	37.039	NA
159308E560	N	R	1	1	29.3144	NA
7DA206A9F0	Y	R	1	1	39.7014	51.3422
9DD1A1ED90	Y	S	0	0	87.2832	1.56773
EA4A32902D	N	R	1	1	32.258	NA
816E1A93A8	N	S	0	0	16.1022	NA
30FEFD90B1	N	S	0	0	14.7472	NA
FA0CA89B6C	N	R	1	1	371	NA
13FA215B29	Y	R	1	1	20.3168	2.67113
5796602B14	N	R	1	1	7.81753	NA
5F6B3F7CA1	N	S	0	0	1.8078	NA
A825849859	Y	R	1	1	10.9412	17.6056
3BEAF8A474	N	R	0.571429	1	39.7042	NA
EDDB0F3BF4	N	R	1	1	6.99676	NA
1F40F63B7E	N	R	0.6	1	22.5119	NA
65834E0B12	N	R	1	1	53.5096	NA
BB05FAE352	N	R	1	1	694	NA
DB527454C8	Y	R	1	1	9.45013	9.98509
2BBB31FC24	N	R	1	1	18.717	NA
856FCEADE5	Y	R	1	1	24.07	27.2313
767917EF3C	N	R	0.351351	1	64.0186	NA
E0928FEFDE	N	S	0	0	79.0156	NA
99079F01D8	N	S	0	0	14.0519	NA
E2234713E2	N	R	1	1	17.7815	NA
4EA1F46F43	N	R	1	1	44.3749	NA
1266E95DDA	N	R	1	1	1.45347	NA
FD1EFAA301	N	R	1	1	14.2059	NA
565BE2AA77	Y	R	1	1	23.0013	22.9513
F82FC74BAC	N	R	1	1	32.4927	NA
CD8BBFE193	N	R	1	1	44.9884	NA
0F7355FB2F	N	S	0	0	0.968437	NA
FA947DAC3E	N	R	1	1	11.6958	NA
2581C982B7	Y	R	0.788732	1	104.7	104.76
7ED8B5D009	Y	R	1	1	7.41321	7.24029
7C492FC7B6	N	S	0	0	5.88465	NA
B843385A35	Y	R	1	1	89.7744	108.223
AB55FFC628	N	S	0	0	1.60832	NA
B153081E4E	Y	R	1	1	54.1578	54.1881
A86E9488F7	Y	S	0.111111	0	52.7218	55.5767
3D758D6EE2	N	S	0	0	14.7425	NA
978B045F0D	Y	R	1	1	9.8056	9.70838
482F5E50C1	Y	R	1	1	51.1853	52.917
5ACBB77B66	Y	S	0.166667	0	26.0048	25.9958
5DF3C7F367	N	R	1	1	23.0583	NA
F4506C4036	N	R	1	1	6.03492	NA
EF93D420B5	N	R	0.631016	1	230.807	NA
EA6A0C65CE	N	R	1	1	7.91115	NA
5150CE5920	Y	R	0.9	1	73.2395	118.4
5E3D315EE7	Y	S	0	0	48.9502	1669.02
304A411722	Y	R	1	1	57.6779	57.6427
66AF861799	Y	R	1	1	52.7564	71.7396
2DDA331EEA	N	S	0	0	48.2041	NA
D8F25D0C77	Y	R	1	1	323.096	337.551
6F4108CB5D	N	S	0	0	25.6416	NA
F72FC5F994	N	R	0.166667	0.5	43.7206	NA
0004AEDE0E	N	S	0	0	40.614	NA
D34035249B	Y	R	0.955556	1	215.151	217.658
E9F5CCC746	N	R	0.923077	1	55.3061	NA
690881B6AD	Y	R	1	1	11.6505	11.5269
D6D8D46E10	N	R	0.8125	1	84.7941	NA
0173581B13	Y	S	0	0	6.44234	6.36873
E66C571E8A	Y	R	1	1	8.21039	14.9509
A3986A71F4	N	S	0	0	8.0202	NA
72014A2F21	N	R	0.228571	0.5	139.493	NA
D34E3F5684	Y	S	0.833333	0.5	19.1278	28.8447
4ABEECFE24	N	R	1	1	25.8694	NA
D443DDF972	Y	S	0.1	0	38.0379	37.9726
4C76CE61DF	N	R	0.578	1	585.94	NA
044F1D68E1	Y	R	1	1	101.5	102.189
D6D010A718	N	S	0	0	2.88294	NA
04EAE3D91F	Y	R	1	1	20.5977	19.9469
6220757021	Y	R	0.797066	1	1157.58	1158.61
4BAE3244E2	N	R	1	1	37.8938	NA
573A48A594	Y	R	1	1	18.4202	18.3403
EDC4627413	Y	R	0.482558	1	245.329	245.629
13B0A49553	Y	R	1	1	18.5532	18.3248
A589050FD2	Y	R	1	1	29.2369	28.8502
250AEC30E7	N	R	1	1	8.30306	NA
AE986589F9	Y	R	1	1	49.6685	49.1215
CCF3162B70	N	R	1	1	73.3498	NA
4A5EF88496	N	S	0	0	34.359	NA
75643EE439	N	S	0	0	24.5505	NA
71EB0E26EC	Y	R	1	1	3.72707	5.88119
B415E53435	Y	R	1	1	14.071	13.878
8947F604B5	Y	R	1	1	12.145	17.9688
B240F97654	Y	R	1	1	4.22572	4.21947
9A6483BA3C	N	S	0	0	28.5317	NA
9484657146	Y	R	0.897059	1	433.563	433.889
7D177FAE54	N	R	1	1	46.5885	NA
6ECBB98DE6	Y	S	0	0	64.3935	64.313
D894094BB5	N	R	0.839161	1	261.242	NA
5FD5520393	N	S	0	0	9.68325	NA
9CD4E1D585	Y	R	1	1	146.437	62.4498
C75D8EE9D8	N	R	0.524764	1	836.646	NA
000A38A42D	N	R	1	1	17.9976	NA
CBC1BE769D	Y	S	0	0	43.8156	43.7862
F46442DD46	N	R	1	1	303.204	NA
75812F5564	N	R	1	1	14.8243	NA
758060FDB8	N	R	1	1	9.71694	NA
2BCC1D6205	N	R	1	1	28.7939	NA
CDD88057EA	N	R	1	1	109.07	NA
827FE7647E	Y	R	1	1	13.1355	17.4583
24FD844A9F	N	R	1	1	10.7528	NA
3757D985E7	N	R	1	1	46.6335	NA
06226E796E	Y	S	0.0714286	0	18.7109	26.215
775FEA27D8	N	S	0	0	19.0976	NA
3FA8CCC5A9	N	S	0	0	14.1162	NA
0345F933E2	N	R	1	1	25.6398	NA
B1C3506785	N	R	1	1	110.133	NA
1D45C170B3	N	R	1	1	40.1431	NA
9F5DFE83A6	N	R	1	1	17.4639	NA
C747827332	N	R	1	1	39.1047	NA
4E45DCDA5A	N	R	1	1	23.928	NA
326A590D14	N	R	1	1	1.94043	NA
C20585BD4C	N	S	0	0	19.7677	NA
484DFE2197	N	R	1	1	15.6229	NA
07934FFAD6	N	R	1	1	26.4085	NA
F8FC4B3C98	N	R	1	1	6.93042	NA
45A3D86092	N	R	1	1	3.78463	NA
2118AA406F	N	S	0	0	18.6535	NA
69F4EC7205	N	S	0	0	11.4598	NA
D5A023B023	N	S	0	0	4.18892	NA
E62E3F856E	N	S	0	0	12.5767	NA
A11414DEBC	N	R	1	1	12.2841	NA
F532B55009	N	R	1	1	14.8808	NA
AD0A4B5F91	Y	S	0	0	14.1579	14.0704
80888BFB59	Y	R	0.52439	0.5	173.094	473.249
5DA4AB02AC	N	R	1	1	31.7255	NA
5F368CFDE9	Y	R	0.975309	1	145.279	145.346
D1489F07DF	N	R	1	1	23.6721	NA
6399794ADF	N	R	1	1	50.5567	NA
726BE22B83	N	R	1	1	81.0359	NA
2D46AC13A5	N	R	1	1	19.4365	NA
69934C29F7	N	R	1	1	28.0239	NA
3EE62F2308	N	R	1	1	7.47269	NA
60465ED8C1	N	S	0	0	3.02081	NA
130DF780A3	N	R	1	1	15.8088	NA
715AB89EAB	Y	R	1	1	30.4101	32.9712
0EA6409E7B	Y	R	0.3	1	70.9564	70.9995
D5050FDF1A	N	R	1	1	19.7394	NA
F78CABEDEA	N	R	1	1	16.6044	NA
06EAC2225D	N	S	0	0	1.55767	NA
3DAAE03091	N	R	1	1	9.66677	NA
9694607ADA	N	R	0.490566	1	47.1013	NA
CC8F3BEE11	N	R	1	1	12.2093	NA
EECC975FCC	N	R	1	1	36.4156	NA
B5A9071662	Y	R	1	1	14.2216	14.1821
361A63084D	N	R	1	1	2.99876	NA
EE3CC75E7B	N	R	1	1	41.4508	NA
A4666717D1	N	R	1	1	12.655	NA
D4C5E44DAA	Y	R	1	1	84.6238	94.2469
CEBF83BD0E	N	R	1	1	11.3544	NA
485D36BB89	N	S	0.0952381	0.5	37.7603	NA
52D6117FB3	N	S	0	0	5.35701	NA
A057533DB1	N	R	1	1	71.8313	NA
0F27FB0A12	N	S	0	0	5.69968	NA
27D6FA4837	N	R	1	1	10.8704	NA
E87D926573	N	S	0	0	24.3664	NA
8C9C746842	N	R	1	1	7.42992	NA
8EAD52CDA2	N	R	1	1	11.5793	NA
C755CA9433	Y	R	1	1	160.677	160.46
A11E5F3FD4	N	S	0	0	7.82881	NA
2B6340BA79	N	S	0	0	40.1708	NA
44AE6F912D	Y	R	1	1	85.3088	85.2366
C14921B86F	N	R	1	1	35.8794	NA
BDF30369DA	N	R	1	1	29.6766	NA
E9AE3890E3	N	R	1	1	16.8242	NA
E38A45D44D	N	R	1	1	14.081	NA
B3EEFFA3CB	Y	R	1	1	10.3862	10.3146
D7C44A355F	N	R	1	1	57.3869	NA
FD30F719AD	Y	R	1	1	12.7928	27.676
634620263E	Y	S	0	0	3.91925	11.4099
37DD93604A	N	R	1	1	16.8332	NA
6EF98E5EEF	N	S	0	0	0.541204	NA
38EC8CDA14	N	R	1	1	41.8747	NA
C531FF28D3	N	R	1	1	4.8289	NA
9EDB49642F	N	S	0	0	23.1669	NA
8437C1DCB6	N	S	0	0	188.669	NA
CC62C0B850	N	R	0.211268	1	161.718	NA
D2057EF22D	N	S	0	0	10.1162	NA
8DD202EAB5	N	R	1	1	37.8077	NA
2884E6B7D2	N	R	0.666667	1	26.9587	NA
6C96866191	N	R	1	1	150	NA
354F0EB207	N	S	0.551724	0	194	NA
1A9003D299	N	R	1	1	58.9163	NA
729947774F	N	S	0	0	37.6215	NA
2B11FC3A8D	N	S	0	0	10.7109	NA
71377D5305	N	S	0	0	8.03405	NA
4779FD39E0	N	R	1	1	8.84973	NA
467EF85F3C	N	S	0	0	15.3304	NA
97A0653BA1	N	R	1	1	23.2908	NA
E5AAC66E50	N	R	1	1	15.1304	NA
A23C71415F	N	S	0	0	20.6512	NA
A71BEBFDD9	N	R	1	1	20.0182	NA
0C52CACEF5	Y	S	0	0	1.33315	11.0852
46BD473B57	N	R	1	1	115.076	NA
33F336620C	N	R	1	1	71.8314	NA
ACE8A652A3	N	S	0	0	9.19209	NA
5BA72FDDB0	N	S	0	0	12.4155	NA
A90A991F15	N	S	0	0	15.58	NA
98C574A745	N	R	1	1	6.51927	NA
DDD6DCDCD0	N	R	1	1	15.6967	NA
43A493A5F9	Y	R	1	1	22.5273	27.1967
4DB7F79A96	N	R	1	1	12.0307	NA
E39C13B7E8	N	R	1	1	13.5316	NA
D224B395D6	N	R	1	1	27.1641	NA
E44FDEEB0B	N	R	1	1	6.87436	NA
E0F80BA315	N	S	0	0	2.77829	NA
6BC9749C63	N	S	0	0	1.62836	NA
60B97AD83E	Y	R	0.694444	1	106.962	106.898
AEFBBC4C39	N	R	0.75	1	17.0884	NA
47D115BF5A	N	R	0.986949	1	768.491	NA
6A71610EB6	N	S	0	0	27.8764	NA
4F3BAB8837	N	R	0.962617	1	113.01	NA
61CDCB6F62	N	R	1	1	11.9643	NA
8A708016E7	N	R	1	1	28.5385	NA
743813C256	N	R	0.306452	1	98.6146	NA
79BE0737E0	N	R	1	1	74.1239	NA
D1F9A20F0F	Y	R	0.953704	0.5	119.117	119.361
61FEFA63E5	Y	S	0	0	0.999618	0.978785
7A2C9CCC96	N	R	0.4	1	56.4797	NA
6537D7BC89	N	R	0.421053	1	37.7242	NA
16CF6F6E46	N	R	1	1	7.94896	NA
6977C19EAA	N	R	1	1	14.7551	NA
27B1DE3631	Y	R	1	1	192.873	194.29
99AE915962	Y	R	1	1	13.6785	13.0423
37FF5E8734	N	R	1	1	9.17676	NA
9E88CF3D4C	N	R	1	1	19.9681	NA
80EE1F457A	N	S	0	0	9.61438	NA
0E7F59B806	N	S	0	0	4.77701	NA
E98DB86C37	N	S	0	0	24.5595	NA
7961CC482D	N	S	0	0	49.5963	NA
3824C531B6	Y	R	1	1	24.1452	24.198
0A9AAA12EE	N	R	1	1	9.11767	NA
72C934407E	N	S	0	0	82.529	NA
5F0C737BAA	Y	R	1	1	166.038	165.99
5410231F65	N	S	0	0	35.5208	NA
7A906A7993	N	S	0	0	25.8796	NA
CC7F0A414A	N	R	1	1	14.7976	NA
36979D4036	N	R	1	1	5.68839	NA
6C2B8D64A0	N	S	0	0	92.6144	NA
0E55CC6027	Y	R	1	1	45.4355	41.5704
08277102D7	N	S	0	0	2.098	NA
4D24BC00D5	N	R	1	1	104.203	NA
9920E4176F	Y	R	1	1	22.9549	22.9549
172F754EF0	N	S	0	0	14.4788	NA
16741D3DFD	N	R	1	1	15.4442	NA
16F8756A12	Y	R	1	1	99.5811	21.9227
C5831F61CF	N	R	1	1	48.0066	NA
4735157949	N	S	0	0	23.9308	NA
DD1D4756BE	N	R	1	1	81.8283	NA
89AC4A0BB0	N	R	1	1	34.6245	NA
086461ED04	Y	R	1	1	22.9873	23.025
9898EEBDC5	N	S	0	0	4.78971	NA
3CED093980	Y	R	0.795699	1	182.031	197.918
B0CAC5FB24	N	S	0	0	125.023	NA
A3F84D8BDC	N	R	1	1	126.363	NA
579BA216E3	Y	R	1	1	8.39171	8.20838
79E27540E7	N	R	1	1	16.841	NA
A08345C13D	N	R	1	1	22.6433	NA
A882011129	N	R	1	1	23.4628	NA
3947406805	N	R	0.7	1	38.1473	NA
6F45B8D2B3	N	S	0	0	34.8014	NA
7940E01296	Y	R	1	1	9.33782	9.16977
D4313036DB	N	R	0.933333	1	19.7068	NA
C7FF75BEEE	N	S	0	0	3.83709	NA
83B28CF3AC	N	R	1	1	8.80976	NA
17FF66A5DA	N	R	0.5	1	14.4604	NA
F075B78469	N	R	1	1	24.5764	NA
C52EC573AA	N	S	0	0	9.91707	NA
DCD22E3536	N	R	1	1	9.48546	NA
67537319FA	N	R	1	1	2.89412	NA
0C14A4B2B3	N	R	1	1	1.63075	NA
DC6A4A7E14	N	R	1	1	2.84633	NA
C695608527	N	R	1	1	11.3227	NA
00AFCBEA61	N	S	0	0	22.4092	NA
CB802EEDEF	N	R	1	1	12.8775	NA
99C5B733DF	N	S	0	0	13.4217	NA
31CCEA850E	Y	S	0	0	19.6494	19.6845
C0F2F60FBE	N	R	1	1	17.442	NA
31F1C71F47	N	R	1	1	15.9069	NA
6A53EC372C	N	R	1	1	14.4122	NA
C4A3C0C4B4	N	R	1	1	22.4767	NA
5168DE621E	N	R	1	1	46.5735	NA
5CBD9C66FD	Y	R	1	1	17.7092	17.6994
0F7ABA1728	N	R	1	1	29.3498	NA
9F7DEE7804	N	R	1	1	18.0713	NA
F9C486DFAF	N	R	1	1	13.4912	NA
55F1A2D4C4	N	R	1	1	6.11478	NA
52CB876F64	N	R	1	1	17.2769	NA
83A782FB36	N	S	0	0	30.5505	NA
AA132CC1A1	N	S	0	0	105.954	NA
283075F5EC	N	R	1	1	27.0819	NA
AB65523CB7	N	S	0	0	10.6075	NA
3F9648A4CB	N	R	1	1	18.7235	NA
373EEA80A1	N	R	1	1	47.8093	NA
50CB7F3FB3	N	R	1	1	9.75103	NA
720A064253	N	S	0	0	16.1219	NA
0126B46BEB	N	R	1	1	30.9323	NA
301D3B6300	N	S	0	0	0.623542	NA
63160A371E	N	S	0	0	5.52385	NA
6C70DC436C	N	R	1	1	37.9364	NA
95D934966B	N	S	0	0	0.906667	NA
922A94F07E	N	R	1	1	22.8817	NA
772E0B4B60	N	S	0	0	46.9427	NA
0C219CD04D	N	S	0.571429	0	42.423	NA
98F6666BCE	N	R	1	1	39.9026	NA
605B6D24C2	Y	R	1	1	0.807245	0.762106
9E28DA6861	N	R	0.4	1	49.5679	NA
E29558BE22	N	S	0	0	16.5206	NA
CD87B60263	N	R	0.857143	1	124.331	NA
648CA26C4F	N	S	0	0	99.7553	NA
06867DC19F	N	S	0	0	12.8813	NA
D5C3A8B6DB	N	R	1	1	18.8167	NA
24F5F4FA16	Y	R	1	1	9.50124	9.47428
9DA87E4BC6	Y	R	0.428571	1	25.0574	82.6212
828C9FF923	N	S	0	0	5.22553	NA
A005D6E70E	Y	R	1	1	31.1197	30.9968
33119B16C8	Y	R	0.8	1	16.4586	16.0538
B7BA3AACEC	Y	R	1	1	14.0961	14.019
F5C44D62D8	N	R	1	1	9.43892	NA
2C6B2D0611	N	R	1	1	24.2938	NA
716F675114	N	S	0	0	6.47105	NA
D65012F1A7	Y	R	1	1	12.0945	12.2154
94BA49BE8B	N	R	1	1	18.326	NA
9DFA413011	N	R	1	1	7.74887	NA
23928167C6	N	S	0	0	17.1765	NA
7647CED290	Y	R	0.95	1	30.2447	29.9235
B083CC1BAA	N	S	0	0	34.6866	NA
906B466E38	N	R	1	1	3.49811	NA
A7C5D5D7EB	Y	R	0.882653	1	225.75	225.757
1AD2BBECA7	N	R	1	1	30.5362	NA
DBE20C22A6	N	R	1	1	13.7076	NA
12A53F9FD5	N	R	1	1	23.8109	NA
66D811E3E0	N	R	0.133333	1	21.1724	NA
A570865793	N	R	1	1	14.8538	NA
E1D0D55ACF	N	R	1	1	15.7138	NA
31FF276537	N	S	0	0	19.099	NA
E4FD5B0F06	N	R	1	1	8.35109	NA
A31A2E803C	Y	S	0	0	2.89296	11.0074
21E56D4603	Y	R	1	1	10.5472	10.3681
88799E48E3	N	R	1	1	16.382	NA
469A6DC579	N	R	1	1	14.0067	NA
F3148F1B94	N	S	0	0	29.6571	NA
2F8BDB97AA	N	R	1	1	61.7652	NA
202C8C3F80	Y	R	1	1	29.9747	30.1066
A251D0A1F1	N	R	1	1	13.0814	NA
16FF7CACCC	N	R	1	1	18.1963	NA
FD8005E1E3	N	R	1	1	10.8954	NA
7813916B69	N	S	0	0	10.8339	NA
D549A2A82B	N	R	1	1	42.9781	NA
74AC9D268B	N	R	0.807692	1	49.675	NA
050607258B	N	R	1	1	13.0337	NA
4AE909C33F	N	S	0	0	18.9058	NA
E82641D830	N	R	1	1	49.7957	NA
316DC189E9	N	R	1	1	60.8866	NA
18E0AC37DA	N	R	1	1	9.99575	NA
1B7FF153ED	N	R	1	1	42.6773	NA
197B72C790	N	R	1	1	9.79851	NA
7280335C9C	N	R	1	1	24.7134	NA
A53E41AFAC	N	R	1	1	36.7074	NA
0B007B20F5	N	S	0	0	16.601	NA
253B4EDB7F	N	R	1	1	13.2885	NA
3F87A27830	N	R	0.333333	1	34.9827	NA
F3FB1DFFE0	N	S	0	0	2.23196	NA
0CAEF1F40E	N	S	0	0	26.0319	NA
45CAECC95A	N	S	0.25	0	70.9337	NA
4B894D614B	N	S	0	0	7.79796	NA
2BE522C709	N	R	0.375	1	16.7764	NA
76336D9D88	N	R	1	1	69.7461	NA
98562F6772	Y	S	0	0	33.1444	33.1166
EC2B573832	Y	R	1	1	66.2306	66.2084
E48570E07D	N	S	0	0	0.63397	NA
F699C56B27	N	R	1	1	34.8761	NA
E39DCE25FB	N	S	0	0	9.29876	NA
A436952B67	N	S	0.5	0.5	43.6848	NA
4990CF5201	N	R	1	1	6.99808	NA
6185820D89	N	R	1	1	57.0423	NA
44632AA519	N	S	0	0	49.6998	NA
3C85784B38	Y	R	0.997159	1	1142.51	1143.86
A1CB009C51	N	S	0	0	23.0969	NA
8A17B1FD48	Y	R	1	1	12.8379	20.4821
9804EC7C29	Y	R	0.211382	1	162.944	163.075
B23DE7A907	Y	R	0.89554	1	1044	1047.16
2A02F5C2DD	N	R	1	1	5.81201	NA
32498250CF	N	S	0	0	17.0298	NA
64A5E0067D	N	R	1	1	90.6891	NA
CD913C1ABE	Y	R	1	1	20.6999	20.6554
9DAC3E1F9B	Y	S	0	0	11.849	11.9789
BF7546C91B	Y	R	1	1	9.66917	9.64347
175184C301	N	S	0	0	18.058	NA
A844B0A79F	N	S	0	0	15.9686	NA
B329792319	Y	R	1	1	10.8766	10.8468
D53DF2AA57	Y	R	1	1	148.887	148.765
959BA93142	N	R	0.861538	1	56.6848	NA
0DE7DCDA5E	Y	R	1	1	39.758	44.1488
E8205305F3	N	R	1	1	10.7771	NA
683979E3ED	N	S	0	0	22.2191	NA
084CCF3340	Y	R	1	1	15.4571	15.4224
054B148CE3	N	S	0.757576	0	59.195	NA
95AB955A78	N	R	1	1	26.4731	NA
3D9FB5B53A	N	R	1	1	30.1613	NA
2078E35E8E	Y	R	1	1	0.740671	0.858646
AEEEAFB107	Y	R	1	1	101.92	101.828
CFEF5804FB	N	S	0	0	19.0646	NA
8DF3D76A6C	N	R	1	1	5.49406	NA
DCF574A179	Y	R	0.922197	1	578.255	636.383
4D8ED93412	N	R	1	1	5.52159	NA
72327368EF	N	R	1	1	70.1992	NA
83FF0D0A92	Y	S	0	0	63.5799	63.8832
D64975CC84	N	R	1	1	33.895	NA
08B1DB5A12	Y	R	1	1	60.106	62.9734
FAEB0BE8EE	Y	R	1	1	37.2067	41.4356
F22591852F	Y	S	0	0	16.2766	180.015
12DE5F437B	N	S	0	0	6.1624	NA
6DB4C6AE72	N	S	0	0	12.8206	NA
B004FF2A9F	N	S	0	0	2.83172	NA
7D65AAD662	N	S	0	0	23.2736	NA
4E15CBC0E4	N	R	1	1	227.678	NA
4424B8EED3	Y	S	0	0	3.97257	6.16775
AE2A1B65A8	Y	R	1	1	35.306	104.2
A7A619C3CF	N	S	0.0454545	0.5	72.4084	NA
7CC28D570E	Y	R	1	1	0.354433	0.293322
6756F3C222	N	S	0	0	48.3341	NA
B84A13FC8B	Y	R	0.836228	1	553.218	355.022
0FA53DCDC9	Y	R	1	1	42.6286	52.33
3FD1F04475	N	S	0.319444	0	7.96014	NA
9AFEE7D484	N	R	1	1	48.4548	NA
44E78462FA	N	S	0	0	69.8977	NA
CD29A944EE	Y	R	0.768293	1	81.6494	33.1742
30B25BB20E	Y	R	1	1	15.4501	15.4386
4E4253B80D	N	S	0	0	22.668	NA
F0DE846B84	N	S	0	0	14.9955	NA
824CCF918C	N	S	0.181818	0	43.6234	NA
30AC90F20A	N	S	0	0	1.81289	NA
7D4784B492	N	S	0	0	11.7747	NA
F047BC1DA6	Y	R	1	1	71.84	73.7825
1BF1B55D43	N	S	0	0	2.00642	NA
1126DF07FE	Y	R	0.283019	1	55.9488	55.98
883E03D146	N	S	0	0	18.8196	NA
23351C97C2	Y	R	1	1	469.901	470.329
3D069FF28C	N	R	0.9	1	20.9386	NA
5D3C96E75E	Y	R	1	1	17.2514	17.1702
95046A5AC5	Y	R	1	1	262.232	263.093
2080B77A41	N	R	1	1	9.71118	NA
69E5563272	Y	R	1	1	9.71263	15.9789
0E7A66ACD0	N	R	1	1	8.97904	NA
2E17EB4328	N	R	1	1	17.4231	NA
8054D00537	N	R	1	1	26.0848	NA
BF088A4270	Y	R	0.53125	1	164.977	168.089
74BBF2DCD2	N	R	0.857143	1	76.2051	NA
D66F0A199E	N	S	0	0	60.0592	NA
46A28795E4	N	S	0	0	10.2877	NA
D762D1528A	Y	S	0	0	13.2468	13.2371
B7F32FC700	Y	R	1	1	12.1786	12.1348
5A1ECFE3FE	N	S	0	0	10.7698	NA
A20FADBF61	Y	R	0.660194	1	307.789	307.911
DEF40B8D80	N	R	1	1	1.79273	NA
EAC7D2A477	N	S	0	0	2.11566	NA
F1F3680967	N	R	1	1	67.0487	NA
A5E45862E4	Y	R	1	1	7.06631	7.02881
65D473FB10	N	S	0	0	9.6848	NA
37C1EF475E	Y	R	1	1	9.43726	11.1656
39C703D181	Y	R	1	1	730.372	730.821
1537DF3ACE	Y	R	1	1	573.442	573.854
AC20421159	N	R	0.815789	1	69.8106	NA
6567D518E4	Y	R	1	1	56.9855	63.9229
123F98BE18	N	R	1	1	17.3987	NA
8C5419049C	Y	R	1	1	11.879	11.3797
E6C794EC39	Y	R	1	1	188.429	189.375
277A406372	Y	R	0.944444	1	39.2181	49.6966
833A4F5778	N	R	1	1	124.948	NA
9D7762EA3E	N	S	0	0	6.60188	NA
F7375741D4	Y	S	0	0	88.2428	88.2572
8F223DAFAF	Y	R	1	1	131.777	1337.07
06C08F0E4D	Y	R	1	1	2.63041	3.96441
066F583A49	Y	R	0.625	1	47.3791	162.157
EBA0A345DE	Y	R	1	1	34.0241	51.5958
6D4B461FB8	Y	R	0.964706	1	323.689	1489.04
D3C40C19CA	N	S	0	0	1.7887	NA
F72CBACA5E	N	R	1	1	93.406	NA
91CD21AB7E	N	S	0	0	28.8113	NA
43D368214F	N	S	0	0	23.3911	NA
F5A50F63BD	Y	R	1	1	66.3296	65.7414
142142BAFA	Y	R	1	1	310.57	321.296
8B4C3DD027	N	R	1	1	15.4827	NA
AEDA134038	Y	R	1	1	1175.1	1191.21
EEB13259EA	Y	R	0.2	0.5	28.6758	28.1669
0B7D9A88B2	N	S	0.352941	0	468.898	NA
C683A36786	N	R	1	1	31.9862	NA
33AB837BEA	Y	R	1	1	15.3619	1474.38
15291F4BAC	Y	S	0.385321	0	716.233	1550.54
CA36683A1F	Y	R	1	1	7.48337	5.87156
7518364326	N	S	0	0	255.859	NA
674A4F675A	Y	R	1	1	597.694	599.445
984163B56C	Y	R	1	1	185.749	186.873
668AEF7EAE	Y	R	1	1	64.54	72.5996
458D1DB777	Y	R	1	1	16.9122	16.8948
C3F1A08A15	Y	S	0	0	82.1677	82.2458
951EE62866	Y	S	0	0	31.6594	31.6556
216778478D	Y	R	0.75	1	11.9791	12.0272
04C4CE3CC9	N	R	1	1	92.6716	NA
4A21A66649	Y	S	0	0	16.1589	1552.51
3436363D06	Y	S	0	0	119.738	119.522
69AC4467C3	Y	R	1	1	76.3688	115.427
B40AD15ED6	Y	R	1	1	48.8192	68.8854
53456011F1	Y	R	1	1	5.1019	4.9144
23528D5505	Y	R	1	1	21.6665	21.4054
88B1635328	Y	R	1	1	690.74	705.9
519ADFFD49	N	R	1	1	255.026	NA
B30B67F6FC	Y	S	0.965517	0.5	372.048	372.438
A4452A4F91	Y	R	1	1	42.4242	42.4202
8CA77EF56A	N	S	0.268293	0	615.307	NA
4ADA399DC3	Y	R	1	1	2.93685	18.3306
70495AE097	Y	S	0	0	8.63644	8.59407
F75E36358C	N	R	1	1	73.948	NA
E48D4DA23A	Y	R	1	1	104.529	104.072
8F6017AB2D	Y	R	1	1	11.2304	14.6868
2603BF8B28	Y	R	1	1	603.429	603.939
CE730258E0	Y	R	0.41453	1	1041.61	1042.89
BC85948C24	Y	R	1	1	16.9722	16.8638
4D895673B2	N	R	1	1	21.3614	NA
1702B47529	N	S	0	0	614.398	NA
DDA7B04997	Y	R	0.636364	1	49.2655	49.0293
801BF8A516	Y	R	0.740157	1	382.399	415.595
11CC856EC3	Y	R	1	1	7.9247	7.85178
82E0E4946D	Y	R	1	1	208.829	208.969
0D1872AD93	Y	R	0.941176	1	379.834	444.326
F54CC40C40	Y	R	0.905405	1	423.251	423.592
07408EE7B3	Y	R	1	1	5.29084	25.0429
C4F3C646EB	N	S	0.172414	0	179.703	NA
69B57E09C0	Y	R	0.799145	1	810.656	832.328
165694DBF1	Y	S	0	0	3.34605	5.17446
812725F1D5	Y	S	0.0888889	0	133.567	238.589
C39CC98B2E	Y	R	1	1	4.99616	23.4181
15DB711A1F	N	R	1	1	3.41638	NA
F0CD5BCAE2	Y	R	1	1	30.8255	30.5309
7DB3D1E6F0	Y	R	1	1	59.2235	95.3709
3904FE0AFB	Y	R	1	1	90.4038	89.78
FB3D895E15	Y	R	1	1	14.7584	14.7272
C2DBCDAE3C	Y	R	1	1	12.9434	32.0063
A20FAFAAEA	Y	R	1	1	105.893	105.925
C7FBBB4E92	Y	S	0	0	84.0636	145.166
4296E62678	Y	R	1	1	41.8471	51.5164
C75EFAA0D1	N	R	1	1	8.68089	NA
5817196547	Y	S	0.2	0.5	3.5423	25.4925
B9050881F7	Y	R	1	1	67.7253	14.3789
AB92BF1789	Y	S	0	0	22.1053	30.1155
C13E68B6CF	Y	R	1	1	41.5731	41.0434
62C21C4E35	N	S	0	0	6.86897	NA
2DE0550DBB	Y	S	0	0	7.93731	7.40537
C25DCD1E11	Y	R	1	1	216.67	224.538
1E2DEA21F2	N	R	1	1	5.99773	NA
F77E05A720	N	R	0.439394	1	68.3372	NA
B869CDB480	Y	R	1	1	1.89648	10.4938
8D27A0C981	Y	R	1	1	586.895	602.815
425488B0FA	N	R	1	1	123.693	NA
956FAC6F62	N	R	1	1	97.4606	NA
7167C93924	N	R	0.0769231	0.5	73.9624	NA
0F60E19F65	N	R	1	1	570.562	NA
09C139DC87	N	R	1	1	5.82127	NA
24D9E921B2	Y	R	1	1	33.5205	45.024
C9884E2AAE	Y	R	1	1	22.6376	28.4946
C438A8E046	N	R	0.435185	0.5	655.397	NA
1868D3A876	Y	R	1	1	63.6967	76.9803
04E1EA86B6	Y	R	1	1	176.568	178.303
4E81A23936	Y	R	1	1	25.8873	42.8221
CAB9BF5A59	Y	R	1	1	2.148	11.696
5073822ABB	Y	R	1	1	366.767	367.131
F8A3D6C13A	N	R	1	1	15.6949	NA
F98E8A37D8	N	R	1	1	3.08064	NA
64D1984F0C	Y	R	1	1	2.0826	1.91108
5F4B7FD067	Y	R	1	1	23.8464	23.2159
AF286AA030	Y	R	1	1	609.135	130.435
CEEDC1594A	Y	R	1	1	48.0523	51.0111
99DD29D8D6	N	R	1	1	2.61823	NA
348560CBED	N	R	1	1	34.7015	NA
4BFE5E47BD	N	R	1	1	15.0128	NA
0D530578C7	Y	R	1	1	259.984	271.321
E375DF58AB	Y	R	1	1	72.0839	72.4343
845604E8F3	Y	R	0.277778	1	36.5013	47.9116
91964EFDDB	Y	R	1	1	20.0108	486.048
CAAEFBFD88	N	R	1	1	41.7573	NA
3744BB98AB	Y	R	1	1	5.78918	18.3551
E86AF1CEA7	N	R	1	1	364	NA
BB955E9E35	Y	R	1	1	150.701	150.872
2868B5C753	Y	R	1	1	38.7473	335.136
27E6D6FD38	Y	R	1	1	215.028	214.241
99A6DDEC60	N	S	0	0	20.4911	NA
2163ACBA8D	N	R	0.716667	1	210.545	NA
DC6AB99AC1	N	R	0.333333	0.5	12.582	NA
4C543E9C7C	N	R	1	1	76.9761	NA
A01384AE96	N	R	0.704545	1	130.594	NA
2B60032FFA	Y	R	1	1	100.257	100.529
9E8432507C	N	S	0.9	0.5	23.5624	NA
833AF5A39A	N	S	0	0	12.5498	NA
56D27A5815	N	S	0	0	17.8342	NA
D5A5198C26	N	R	1	1	39.5446	NA
CB82D607F6	Y	R	1	1	40.5813	40.7647
DA3AE4F694	N	R	1	1	342	NA
6AE79F6ECB	Y	R	1	1	430.127	440.357
41CAE0A159	N	R	1	1	177.408	NA
AEF8CC570B	N	R	1	1	26.5308	NA
446ED7E9AC	Y	R	1	1	28.5757	40.8645
D525DD5C11	Y	R	1	1	31.9376	1240.49
0B263956C3	N	S	0	0	1.87847	NA
43A1D12412	N	R	1	1	58.8115	NA
381658ADEB	Y	S	0	0	35.3172	1207.56
EA325BF93E	N	R	1	1	18.0975	NA
7B42A23697	Y	R	1	1	20.9717	20.9687
20864DE0F9	N	S	0	0	2.2926	NA
D288F14332	N	R	0.625	1	47.5585	NA
32B82DB177	N	S	0	0	13.967	NA
A61618BE33	N	R	1	1	20.9364	NA
48D0CD2EF1	Y	S	0	0	13.8985	16.5119
A4D7E2C0D9	Y	R	1	1	33.3127	42.423
06D50BC919	N	S	0	0	11.9655	NA
0C98F25340	Y	S	0	0	12.812	16.7688
363C183E76	Y	R	1	1	16.4709	20.7021
9B4D8BEC19	Y	R	0.75	1	33.435	97.5045
3DFAA8D1D9	N	R	1	1	11.4751	NA
F4E5CF7B01	Y	R	1	1	288.899	613.586
2DBD4C6564	N	S	0	0	35.8865	NA
A318DB1E7A	N	S	0	0	17.4658	NA
C10C02781A	N	S	0	0	43.5616	NA
AB43ACD42E	N	R	1	1	5.52993	NA
01E3838325	N	S	0	0	4.74727	NA
1EE1362646	Y	R	0.920354	1	359.442	893.011
139906A421	N	R	0.72549	1	71.2609	NA
EB627C4D26	Y	R	0.918103	1	367.266	367.756
7C89EF9900	Y	R	1	1	84.449	95.9509
670501EEBA	N	R	1	1	34.9159	NA
0FD8F4CEF3	N	S	0	0	0.697975	NA
01CD955F93	N	R	1	1	14.0154	NA
D325FB1582	N	S	0	0	2.98258	NA
1127C6728F	Y	R	0.74	1	55.7858	53.7896
5778A36334	N	R	1	1	0.991771	NA
9A44524E17	N	R	1	1	22.1162	NA
F1CC035D17	N	R	1	1	19.051	NA
6CB69D4976	N	R	0.142857	0.5	25.228	NA
C90B47187F	Y	R	0.666667	1	27.1464	1144.46
FE6958CF43	Y	R	0.697674	1	150.095	150.092
EE2BFA5BBA	Y	R	0.566265	1	160.124	1423.42
89D17EC7F5	N	R	1	1	104.11	NA
1DB70FF914	N	R	1	1	30.0067	NA
FA8DE52B61	N	S	0	0	11.2933	NA
5EB7770865	N	R	0.777778	1	17.7117	NA
2EE865D856	N	R	1	1	73.7997	NA
9D909F711F	N	R	1	1	12.5758	NA
7E6AABE521	N	S	0	0	10.8964	NA
C81A094ACE	N	S	0	0	8.24834	NA
63B92862EE	N	S	0	0	2.43891	NA
0A43D8F0C7	N	R	1	1	112.452	NA
265F212B52	N	R	1	1	43.0113	NA
824F5B88A4	Y	R	1	1	39.8936	39.8103
DFBABA4580	N	R	0.949153	1	194.355	NA
0229350A22	N	S	0	0	6.96333	NA
576C733911	N	R	0.767442	1	181	NA
6BC2852A42	Y	R	0.942857	1	134.746	156.621
E8E6C746D6	N	S	0	0	84.1688	NA
B286A373EA	Y	R	1	1	40.8248	44.7969
7015878EC5	N	R	1	1	34.9111	NA
FFCBCCD2CB	Y	S	0	0	7.357	6.8202
B55D3B9194	Y	S	0	0	13.7969	13.606
8219B86ABC	Y	R	1	1	47.2977	74.2238
FB00CA1232	Y	R	1	1	23.8135	24.6913
4BF15080A6	Y	S	0	0	3.84196	8.78546
33C0353FDD	N	R	1	1	86.0505	NA
FDFD6998B5	Y	R	1	1	16.1661	15.9578
E2DBB25AE1	Y	R	1	1	248.607	249.072
4E13B92A20	Y	R	0.333333	0.5	61.9592	61.7966
E34CEF9E01	Y	R	1	1	365.16	440.085
5980EB2905	Y	R	1	1	63.2228	63.3194
2185F2241F	N	S	0	0	9.51664	NA
C32887E38F	Y	R	1	1	328.966	719.644
BDAD276322	Y	R	0.666667	0.5	20.2994	2.17373
59F9EC4FC1	Y	R	1	1	33.9017	43.7249
9E4E1DD552	Y	R	1	1	152.503	164.601
4E1428AE54	N	R	1	1	21.5791	NA
D82EA465DD	Y	R	1	1	34.7135	55.6166
4E6FA2D799	N	S	0.0555556	0	53.9329	NA
2232B47D65	Y	R	1	1	551.565	635.45
E597200E19	Y	R	1	1	12.6943	46.7861
69B938CFED	Y	R	0.755656	1	1256.55	1288.8
78DB8F644B	N	R	0.197115	1	600.491	NA
56C564F8B1	N	R	0.796429	1	1163.8	NA
2DB7AD5775	Y	R	1	1	2.14176	2.05495
4B38CEA77F	Y	R	1	1	314.709	315.046
D4E624DC23	Y	R	1	1	50.511	50.472
F25FD1624F	Y	R	1	1	4.84541	4.23499
603CCD893B	Y	R	1	1	69.5544	69.1073
1EFF48A2D5	N	R	1	1	9.12848	NA
9C2AEF4442	N	R	1	1	9.24258	NA
8A4232DB28	N	S	0	0	20.8817	NA
83419C5EE5	N	R	1	1	29.4553	NA
291BEF3EE4	N	R	1	1	8.5101	NA
A3567D9EBC	N	S	0	0	16.319	NA
722F8DA418	N	R	1	1	8.95242	NA
C2E109E793	Y	S	0.097561	0	34.1598	34.0168
08FFCACD76	N	S	0	0	33.8962	NA
97185D4192	Y	S	0	0	65.7657	65.1053
5AB321F1C0	N	R	1	1	32.575	NA
0AF080B7AF	Y	R	1	1	14.6458	19.9293
2D48B932C8	Y	R	1	1	32.7254	38.157
875865A27C	N	S	0	0	74.5281	NA
B883674A57	N	R	1	1	63.073	NA
9D0A3B4260	N	R	1	1	14.8594	NA
8C9E9BA98F	Y	R	1	1	11.2622	48.0882
60EC569DB5	Y	S	0	0	7.21174	6.99438
91E5E04871	N	S	0	0	20.7134	NA
F7136762AA	Y	R	1	1	24.7503	25.0008
8E92FAE31E	N	R	1	1	48.801	NA
15A846916D	Y	R	1	1	34.5697	42.9266
0E7D2CA44C	Y	S	0.845528	0	935.813	778.942
DBCA7D409B	N	S	0	0	18.8799	NA
A0CFBCE1B9	N	S	0	0	9.16427	NA
D9CC086F3C	N	R	1	1	7.61736	NA
C1F31916C7	N	S	0.76	0	364.419	NA
A695D4BB47	Y	R	1	1	76.5183	76.2768
FFAA22E084	Y	R	1	1	18.5639	23.477
4B9E550F9E	Y	R	1	1	18.7756	23.2041
B1FA829A65	N	S	0.85	0.5	72.4373	NA
321B3D75FC	Y	R	0.889764	1	366.409	373.365
5C93E6F99C	Y	R	0.962264	1	224.801	231.56
E307B893DC	Y	R	1	1	8.0317	7.95948
4E462DE535	Y	R	1	1	54.7262	54.7077
53CB9B1085	Y	R	0.8	1	136.792	605.164
59D6643834	Y	R	0.789474	1	55.3188	61.5254
034BA8B860	Y	R	0.925926	1	30.2819	33.2659
E00B261AC2	Y	R	0.25	1	45.361	60.3675
6A7ACD5CE9	Y	S	0	0	35.8335	35.5726
7263FD6E9A	Y	R	1	1	96.6929	96.8897
3F4803C140	Y	R	1	1	10.6639	10.4639
622568F04A	Y	R	1	1	998.489	1014.72
5A32D3A7D0	Y	R	1	1	261.706	266.822
150676BC76	N	S	0	0	18.5026	NA
185995EF56	Y	R	1	1	125.17	447.555
FCAD538BE6	N	R	1	1	29.8323	NA
361388A465	Y	R	1	1	49.9452	25.006
7AABDE4E7E	N	R	1	1	50.7138	NA
2D36B9E6AB	Y	R	1	1	2.24214	31.9587
Notes: LastPaAST, antimicrobial susceptibility of the last isolate of PA before discharge (classified as resistant [R] or susceptible [S]); IHM, in-hospital mortality; ICU-LOS, ICU length of stay; ICU-Death interval, time from ICU admission to death; CRR-PA-Last2, average carbapenem resistance rate of the last two isolates; CRR, carbapenem resistance rate.
