# Supplementary material for: A Hybrid AutoML Ensemble Integrating Conventional Learners and Gradient-Boosting Models for Multi-Outcome Prediction in ICU Patients with Pseudomonas aeruginosa
Source: Research Square preprint supplement (doi:10.21203/rs.3.rs-7125109/v1), 2025-07-23
Supplement: Supplementary file 2 [file 888247e8b16a85267c7fdecf.xlsx]

## Sheet:  Supplementary Table S3
Table S3. Descriptive statistics for baseline characteristics and outcome variables.
Variable (unit)		Category	Frequency (%) or GM (GSD)*
Demographics
	Sex	Male	597 (70.5)
		Female	250 (29.5)
	Age (years)	18~34	33 (3.9)
		35~64	161 (19.0)
		65~84	342 (40.4)
		≥85	311 (36.7)
Surgery & Invasive Procedures
	NSP	0	427 (50.4%)
		1	239 (28.2%)
		≥2	181 (21.4%)
	CVC-days		20.28 (2.94)
	MV-days		17.86 (3.51)
	UC-days		21.30 (3.49)
Microbiological Characteristics
	TFC-CRPA (days)		17.76 (2.14)
	IPA-CARBSUSC	R	533 (62.9)
		S	314 (37.1)
Antibiotic Exposure
	DAMT (DOT)		10.95 (3.45)
	CAMT (DOT)		1.22 (2.14)
	TAMT (DOT)		2.90 (3.32)
	AG (ATC/DDD per DOT)		0.18 (0.63)
	AF (ATC/DDD)		4.05 (4.10)
	AF (ATC/DDD per DOT)		1.51 (1.60)
	BL/BLI (ATC/DDD)		2.35 (2.96)
	BL/BLI-AP (ATC/DDD per DOT)		0.77 (0.97)
	CARB (ATC/DDD)		6.70 (2.54)
	CARB (ATC/DDD per DOT)		1.53 (0.96)
	FQ (ATC/DDD)		1.16 (2.42)
	FQ (ATC/DDD per DOT)		0.54 (1.04)
	GC (ATC/DDD per DOT)		0.47 (1.01)
	IMZ (ATC/DDD)		0.08 (0.54)
	LIN (ATC/DDD)		0.01 (0.12)
	LIN (ATC/DDD per DOT)		0.00 (0.05)
	LPD (ATC/DDD)		0.72 (2.30)
	LPD (ATC/DDD per DOT)		0.39 (1.07)
	MAC (ATC/DDD)		0.06 (0.48)
	MAC (ATC/DDD per DOT)		0.03 (0.21)
	MON (ATC/DDD)		0.02 (0.29)
	MON (ATC/DDD per DOT)		0.01 (0.13)
	NIT (ATC/DDD)		0.00 (0.13)
	NIT (ATC/DDD per DOT)		0.00 (0.02)
	OXA (ATC/DDD)		2.09 (3.05)
	OXA (ATC/DDD per DOT)		0.77 (1.10)
	PEN (ATC/DDD)		0.01 (0.16)
	PHO (ATC/DDD per DOT)		0.03 (0.23)
	PMX (ATC/DDD per DOT)		0.25 (0.45)
	RIF (ATC/DDD)		0.03 (0.35)
	RIF (ATC/DDD per DOT)		0.01 (0.15)
	2GC (ATC/DDD)		0.17 (0.73)
	2GC (ATC/DDD per DOT)		0.09 (0.35)
	SUL (ATC/DDD)		0.01 (0.19)
	SUL (ATC/DDD per DOT)		0.01 (0.09)
	TET (ATC/DDD)		0.06 (0.48)
	3GC (ATC/DDD)		2.61 (4.19)
	3GC (ATC/DDD per DOT)		0.98 (1.51)
	3GC-BLI (ATC/DDD)		3.53 (4.10)
	3GC-BLI (ATC/DDD per DOT)		1.18 (1.40)
Outcome Variables
	CRR (%)		0.63 (0.35)
	CRR-PA–Last2 (%)	0	223 (26.3%)
		0.5	21 (2.5%)
		1	603 (71.2%)
	LastPaAST	R	615 (72.6%)
		S	232 (27.4%)
	Death	Y	312 (36.8%)
		N	535 ( 63.2%)
	ICU-LOS (days)		28.95 (2.69)
	ICU-Death interval (days)		56.01 (3.70)
Notes: NSP, Number of surgical procedures; CVC-days, duration of central venous catheterization; MV-days, duration of mechanical ventilation; UC-days, duration of urinary catheterization; TFC-CRPA, time to first CRPA detection after ICU admission; IPA-CARBSUSC, Initial PA isolate carbapenem susceptibility; DAMT, duration of dual antimicrobial therapy; CAMT, duration of ≥3 antimicrobial combinatio…
