# Supplementary material for: A Hybrid AutoML Ensemble Integrating Conventional Learners and Gradient-Boosting Models for Multi-Outcome Prediction in ICU Patients with Pseudomonas aeruginosa
Source: Research Square preprint supplement (doi:10.21203/rs.3.rs-7125109/v1), 2025-07-23
Supplement: Supplementary file 2 [file f37cbe5302f74fc0aaf5f7e6.pdf]

(a)

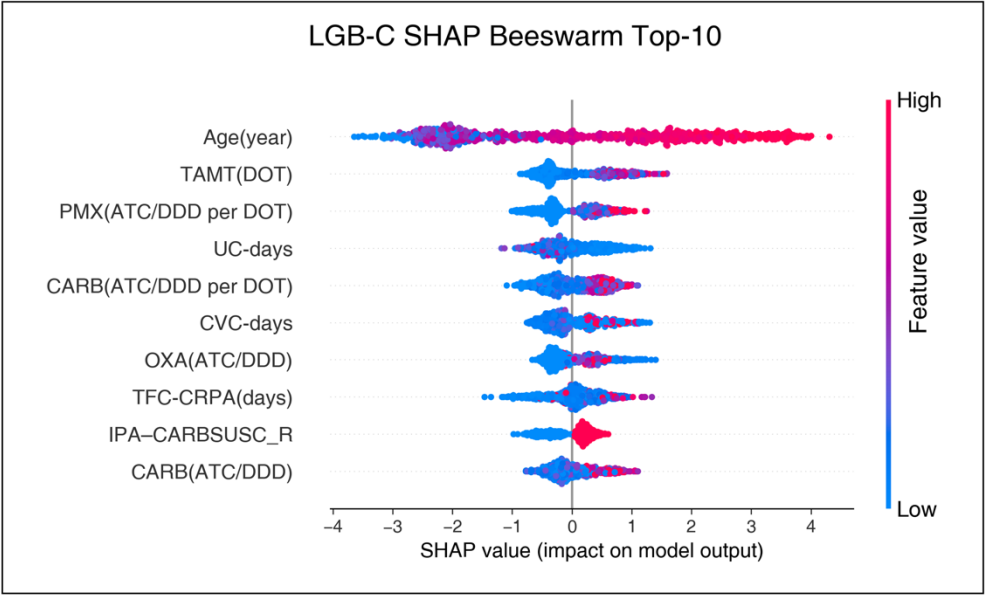

(b)

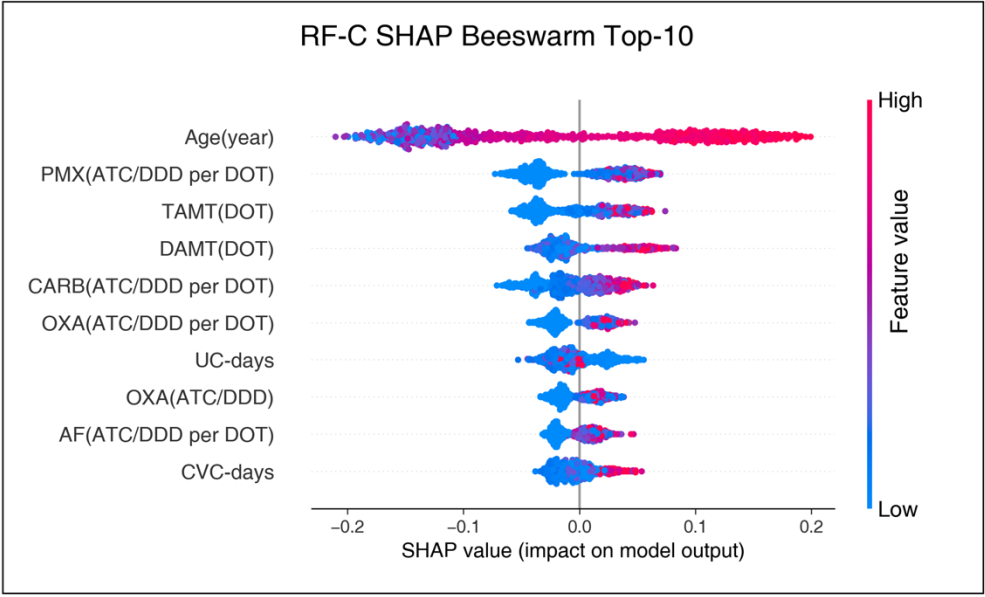

(c)

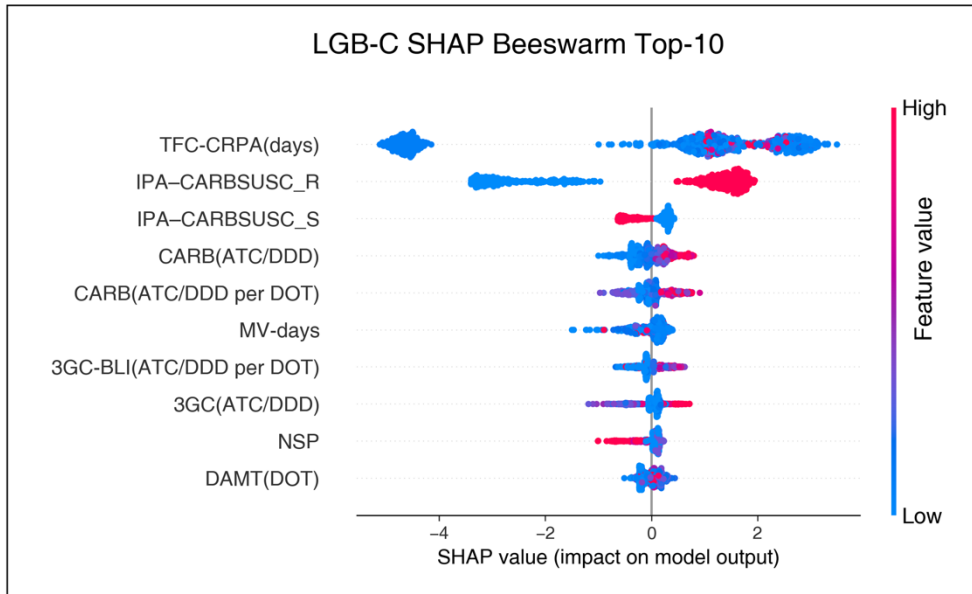

(d)

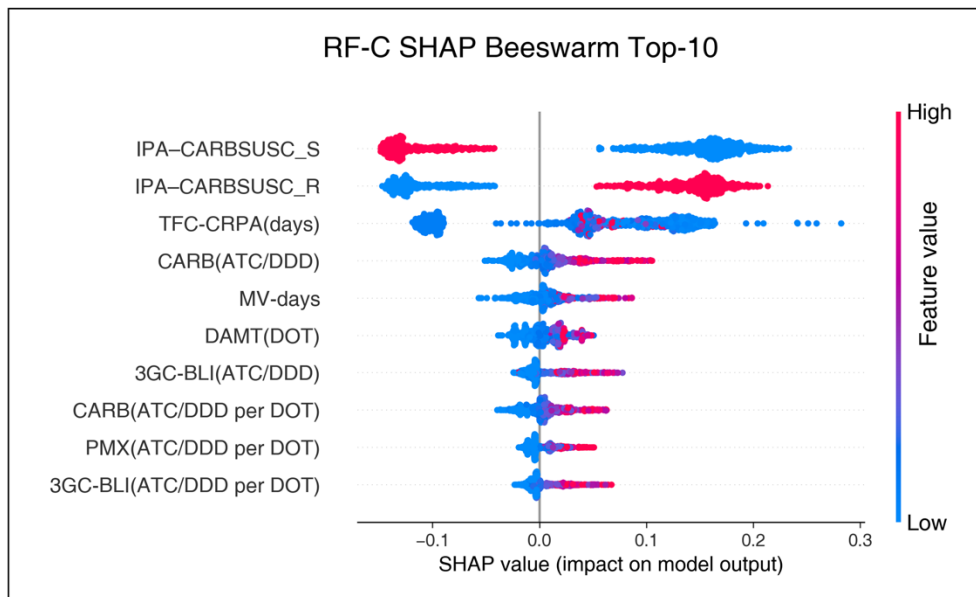

**Fig. S5 Global SHAP beeswarm plots for two binary outcomes.**

(a) LGB-C model for IHM; (b) RF-C model for IHM; (c) LGB-C model for LastPaAST; (d) RF-C model for LastPaAST. Each dot represents an individual SHAP value, with the color indicating a normalized feature value (blue = low; red = high). The features were ranked by the mean absolute SHAP value ( $|\text{SHAP}|$ ), reflecting their relative contributions to the prediction. Only the top 10 features are shown; the SHAP values for all the remaining features are close to zero.
