# Supplementary material for: A Hybrid AutoML Ensemble Integrating Conventional Learners and Gradient-Boosting Models for Multi-Outcome Prediction in ICU Patients with Pseudomonas aeruginosa
Source: Research Square preprint supplement (doi:10.21203/rs.3.rs-7125109/v1), 2025-07-23
Supplement: Supplementary file 3 [file b35329e21aada1c9bccf9949.xlsx]

## Sheet: Supplementary Data S7
Data S7. De-identified feature matrix for all 847 ICU patients
Study ID	Age(year)	sex	DAMT(DOT)	CAMT(DOT)	TAMT(DOT)	NSP	CVC-days	MV-days	UC-days	AG(ATC/DDD per DOT)	AF(ATC/DDD)	AF(ATC/DDD per DOT)	BL/BLI(ATC/DDD)	BL/BLI-AP (ATC/DDD per DOT)	CARB(ATC/DDD)	CARB(ATC/DDD per DOT)	FQ(ATC/DDD)	FQ(ATC/DDD per DOT)	GC(ATC/DDD per DOT)	IMZ(ATC/DDD)	LIN(ATC/DDD)	LIN(ATC/DDD per DOT)	LPD(ATC/DDD)	LPD(ATC/DDD per DOT)	MAC(ATC/DDD)	MAC(ATC/DDD per DOT)	MON(ATC/DDD)	MON(ATC/DDD per DOT)	NIT(ATC/DDD)	NIT(ATC/DDD per DOT)	OXA(ATC/DDD)	OXA(ATC/DDD per DOT)	TFC-CRPA(days)	IPA–CARBSUSC	PEN(ATC/DDD)	PHO(ATC/DDD per DOT)	PMX(ATC/DDD per DOT)	RIF(ATC/DDD)	RIF(ATC/DDD per DOT)	2GC(ATC/DDD)	2GC(ATC/DDD per DOT)	SUL(ATC/DDD)	SUL(ATC/DDD per DOT)	TET(ATC/DDD)	3GC(ATC/DDD)	3GC(ATC/DDD per DOT)	3GC-BLI(ATC/DDD)	3GC-BLI(ATC/DDD per DOT)
68635A955B	88	Male	129.776	8.06458	51.609	2	175	211	0	0.8	192.5	10	0	0	39.3333	8.33333	9	2	2	0	0	0	0	0	0	0	0	0	0	0	24.5	3.5	28.6307	R	0	0	2.24242	14.6667	1.33333	0	0	0	0	0	37.8333	5.58333	55.5	8
DBFED3DF34	98	Male	53.266	0	22.2326	1	51	58	78	0	25.9	6.9	0	0	12	3	0	0	0	0	0	0	5.35714	3.57143	0	0	0	0	0	0	28.5	8.5	56.973	R	0	0	0.833333	0	0	0	0	0	0	0	10.4167	3.33333	56	3.5
93BA0B1C7B	80	Male	12.4201	0	0	0	13	23	23	0	3.4	2.4	8.67857	0.964286	13.3333	1.33333	5.08333	3.08333	3	0	0	0	0	0	0	0	0	0	0	0	0	0	19.964	R	0	0	0	0	0	0	0	1.6	1.2	0	0	0	4.5	1.5
8AEA36DB78	84	Female	3.61528	0	0	0	31	31	31	0	0	0	0	0	15	3	6	2	0	0	0	0	0	0	0	0	0	0	0	0	0	0	28.7745	R	0	0	0	0	0	0	0	0	0	0	0	0	13.5	4.5
01254E2528	56	Female	120.376	0	6.76875	0	251	1160	1160	30.7559	89.75	15.5	5.14286	2.57143	58.75	6.5	23	4	25.5	0	0	0	14.2857	3.57143	0	0	0	0	0	0	0	0	39.8828	R	0	0	1.44444	0	0	7.75	0.75	0	0	0	102.5	13.75	42	6
3D67CE0BC2	80	Male	9.37014	0	0	0	19	14	19	0	0	0	0	0	4	1	0	0	0	0	0	0	0	0	0	0	0	0	0	0	6.5	1.5	8.69244	R	0	0	0	0	0	0	0	0	0	0	0	0	24	1.5
6307B21473	79	Male	216.294	35.5368	84.2611	0	314	192	73	0	111.8	17.8	86.7857	13.5	42.4167	6.41667	68	23	9.5	26.5	0	0	0	0	0	0	0	0	0	0	131	22.5	5.33531	R	0	0	1.05556	0	0	0	0	0	0	0	55.375	10.875	135.5	20.5
BE64DF5164	89	Male	20.7063	0	0	0	16	18	21	0	0	0	0	0	22.8333	1.83333	0	0	0	0	0	0	0	0	0	0	0	0	0	0	0	0	33.7082	R	0	0	0.305556	0	0	0	0	0	0	0	0	0	0	0
140E55534F	95	Male	26.7722	0	0	0	62	993	761	0.8	0	0	32.9107	5.51786	6.33333	0.833333	153.5	29.0833	0	0	0	0	0	0	0	0	0	0	0	0	14	3	101.918	R	0	0	0	0	0	0	0	0	0	0	4.5	4.5	76.25	14.25
6532C5639C	82	Male	24.9063	0	0	1	26	26	26	0	0	0	17.0357	3.85714	0	0	0	0	0	0	0	0	0	0	0	0	0	0	0	0	0	0	0	S	0	0	0	0	0	0	0	0	0	0	0	0	21.5	2
A9D45FF1FF	80	Male	23.8646	6.0125	12.6472	2	27	43	0	0	31	3	14.7857	1.28571	21.8333	4.58333	4	1	0	0	0	0	0	0	0	0	0	0	0	0	18	2	41.9001	S	0	0	0	0	0	0	0	0	0	0	12	1	8	2
10343E80B3	88	Male	59.6632	5.91111	12.7854	0	85	78	86	0	12.4	4.4	0	0	19.5	4	16	3	5.5	0	0	0	0	0	0	0	0	0	0	0	0	0	0	S	0	0	0.916667	0	0	0	0	0	0	0	48.625	8.875	43	4
D6B8619BC8	32	Male	9.13125	0	0	1	10	10	10	0	0	0	4.17857	1.60714	9.33333	1.33333	0	0	0	0	0	0	14.2857	3.57143	0	0	0	0	0	0	0	0	9.6822	R	0	0	0	0	0	0	0	0	0	0	0	0	0	0
3F3DD29BCB	73	Male	19.2479	0	24.7215	0	17	17	17	0	11.4	2.4	0.964286	0.964286	0	0	0	0	1.5	8.5	0	0	0	0	0	0	0	0	0	0	8	3	2.96307	R	0	0	0	0	0	0	0	0	0	0	0	0	30.5	5
C61A383F4C	80	Male	15.0264	8.05208	9.27639	1	10	10	10	0	4	2	6.10714	1.28571	7	2.5	8	2	0	0	0	0	0	0	0	0	0	0	0	0	11.5	2.5	0	S	0	0	0	0	0	0	0	0	0	0	0	0	0	0
53A67FA9F1	70	Male	0	0	0	1	19	12	19	0	0	0	17.0357	2.57143	0	0	0	0	0	0	0	0	0	0	0	0	0	0	0	0	0	0	11.688	R	0	0	0	0	0	0	0	0	0	0	0	0	0	0
F84A032A83	90	Male	14.5083	0	0	2	20	66	76	0	3.4	2.4	0	0	15.1667	2.5	0	0	3	0	0	0	0	0	0	0	0	0	0	0	0	0	24.9476	S	0	0	0.166667	0	0	0	0	0	0	0	24.5	3.5	23.5	4
5B5EDA2F33	74	Male	5.95694	0	0	1	21	5	8	0	0	0	0	0	4.66667	0.666667	8	2	0	0	0	0	0	0	0	0	0	0	0	0	0	0	6.04501	R	0	0	0	0	0	0	0	0	0	0	0	0	0	0
5F25608F1E	91	Female	87.825	0	8.22153	1	154	219	152	0	33.8	6.8	3.53571	0.964286	36.75	3.75	11.5	3	0	0	0	0	0	0	0	0	0	0	0	0	28	6	121.908	R	0	0	0.333333	0	0	0	0	0	0	0	113.167	15.6667	49	9
F253B387C6	63	Male	26.3979	0	3.96042	3	80	35	39	2.4	38.4	13.4	10.6071	1.92857	10.6667	2.66667	0	0	1	0	0	0	0	0	0	0	0	0	0	0	6.5	1.5	7.78815	R	0	0	0	0	0	0	0	0	0	0	0	0	37	5.5
9CD7B40F84	67	Male	15.4792	0	5.20694	2	15	25	25	0	18	4	0	0	8	1.25	0	0	0	0	0	0	0	0	0	0	0	0	0	0	0	0	4.02455	R	0	0	0	0	0	0	0	0	0	0	0	0	26	2
82948DC66B	91	Male	65.4368	0	22.1069	1	122	81	122	0	40.4	7.4	18	4.5	44.1667	4.66667	0	0	2	0	0	0	16.0714	1.78571	0	0	0	0	0	0	0	0	24.9533	S	0	0	11.1111	0	0	0	0	0	0	0	48.1667	6.66667	29	2
2D183C21D8	72	Male	0	0	0	1	7	0	0	0	0	0	0	0	0	0	0	0	0	0	0	0	0	0	0	0	0	0	0	0	0	0	13.6446	S	0	0	0	0	0	0.666667	0.166667	0	0	0	0	0	11	2
918EF09A22	57	Male	1.99653	0	0	2	25	11	26	0	0	0	4.17857	1.60714	9	1	0	0	0	0	0	0	0	0	0	0	0	0	0	0	0	0	5.05972	R	0	0	0	0	0	0	0	0	0	0	0	0	0	0
7F7FF08009	63	Male	11.8903	0	11.8618	1	29	21	29	0	34.6	7.6	2.89286	1.60714	16.0833	2.08333	0	0	4	0	0	0	30.3571	7.14286	0	0	0	0	0	0	0	0	0	S	0	0	0	0	0	0	0	0	0	0	0	0	0	0
5B31B34152	83	Female	7.49444	0	0	2	32	3	26	0	0	0	6.10714	1.28571	5.66667	1.66667	0	0	0	0	0	0	0	0	0	0	0	0	0	0	5	1	490.029	R	0	0	0	0	0	4	1	0	0	0	0	0	0	0
22C320310F	83	Female	0	0	0	0	4	4	4	0	0	0	8.35714	1.60714	0	0	0	0	0	0	0	0	0	0	0	0	0	0	0	0	0	0	8.74619	R	0	0	0	0	0	0	0	0	0	0	0	0	0	0
F7016EC9E3	77	Male	145.545	22.4333	38.5646	2	158	161	188	0	95.5	19.5	0	0	89.6667	10.6667	20	5	11	0	0	0	35.7143	16.0714	0	0	0	0	0	0	7.5	1.5	80.8957	R	0	0	2.44444	0	0	0	0	0	0	0	13.3333	4.83333	118.25	20.75
0450A63A55	91	Male	10.2132	2.85417	4.31736	0	11	6	11	0	10.9	3.9	0	0	3.5	1.25	0	0	0	0	0	0	16.0714	3.57143	0	0	0	0	0	0	5	1	14.4708	R	0	0	0	0	0	0	0	0	0	0	2.24	2.24	1.625	0.375
C7DFB6C643	67	Male	0	0	0	0	27	0	14	0	0	0	0	0	0	0	0	0	0	0	0	0	0	0	0	0	0	0	0	0	0	0	0	S	0	0	0	0	0	0	0	0	0	0	0	0	0	0
771A517007	85	Female	15.0049	0	6.975	2	1	23	23	0	17	2	0	0	0	0	0	0	0	0	0	0	0	0	0	0	0	0	0	0	0	0	14.4053	R	0	0	0	0	0	0	0	0	0	0	0	0	36.5	2
67861C26CE	97	Male	3.78194	0	0	2	14	1	14	0	0	0	0	0	0	0	6	2	0	0	0	0	0	0	0	0	0	0	0	0	0	0	0	S	0	0	0	0	0	4	1	0	0	0	5.5	1.5	0	0
8C4E7CAC80	91	Male	1.28819	0	0	0	31	6	91	0	2	2	25.7143	2.57143	18.1667	0.666667	0	0	0	0	0	0	0	0	5	3	0	0	0	0	0	0	27.7858	R	0	0	0	0	0	0	0	0	0	0	0	0	0	0
99C3775FD2	72	Female	27.1111	17.1389	17.1389	1	99	53	114	0	8	3	2.89286	1.92857	30.3333	2.33333	0	0	2	0	0	0	17.8571	3.57143	0	0	0	0	0	0	0	0	60.5785	R	0	0	0	0	0	0	0	0	0	0	0	0	22	4
0BECCD8559	73	Male	35.0882	8.87222	24.6625	0	29	29	29	0	39.3	10.3	0	0	15	3.66667	9	2	0	0	0	0	0	0	0	0	0	0	0	0	10.8333	2.83333	3.5161	R	0	0	0.444444	0	0	0	0	0	0	0	0	0	13	4
762C769B4A	86	Male	21.3562	0	9.10278	0	62	62	63	0	8.4	2.4	4.18571	1.29286	8.66667	1.66667	0	0	0	6.2	0	0	0	0	0	0	0	0	0	0	12	2	27.4844	R	0	0	0.111111	0	0	0	0	0	0	0	35.25	3.75	34.5	10.5
DA32E80363	85	Male	29.8556	3.02361	7.04097	0	29	28	29	0	15.9	4.1	11.8929	3.21429	15.5	2.25	0	0	0	0	0	0	0	0	0	0	0	0	0	0	0	0	22.5459	R	0	0	0.222222	0	0	0	0	0	0	0	0	0	0	0
5047797445	82	Male	0	0	0	1	5	0	0	0	0	0	6.42857	1.92857	0	0	0	0	0	0	0	0	0	0	0	0	0	0	0	0	0	0	0	S	0	0	0	0	0	0	0	0	0	0	6.5	3	0	0
3751657CBB	86	Female	24.8632	9.87153	12.5632	0	16	19	56	0	17.4	5.4	9.96429	4.17857	9.16667	2.66667	0	0	0	0	0	0	0	0	0	0	0	0	0	0	10.5	1.5	49.9942	R	0	0	0.277778	0	0	0	0	0	0	0	5.25	1.25	28	2.5
F53659A35D	30	Male	8.11944	3.03125	3.03125	0	9	7	9	0	0	0	10.6071	1.60714	3.33333	1.33333	8	3	0	0	0	0	7.14286	3.57143	0	0	0	0	0	0	4.5	1.5	8.87494	R	0	0	0	0	0	0	0	0	0	0	0	0	0	0
53818BB312	93	Female	1.50694	0	0	0	0	3	3	0	4.5	3	6.42857	2.89286	0	0	0	0	0	0	0	0	0	0	0	0	0	0	0	0	1.5	1.5	3.71167	R	0	0	0	0	0	0	0	0	0	0	0	0	0	0
5FA764FF0F	79	Female	21.4458	0	18.116	0	22	17	22	0	28	7	11.8929	3.21429	0	0	11	2	0	0	0	0	0	0	0	0	0	0	0	0	10.5	1.5	23.6364	R	0	0	0	0	0	0	0	0	0	0	21.5	2	0	0
4C45143E83	96	Female	9.94931	3.96528	3.96528	1	13	16	16	0	18	3	15.75	1.60714	6.33333	1.33333	0	0	0	0	0	0	0	0	0	0	0	0	0	0	0	0	10.4563	R	0	0	0.222222	0	0	0	0	0	0	0	2.91667	1.66667	0	0
1A86F9028B	76	Male	41.2368	3.91319	5.31528	0	50	89	89	0	80	11	21.5357	1.28571	17.3333	2.33333	7	2	2	0	0	0	0	0	0	0	0	0	0	0	0	0	0	S	0	0	0.25	6	3.33333	0	0	0	0	0	0	0	41.5	4
1F504B9912	75	Female	0	0	0	2	21	14	14	0	0	0	0	0	0	0	0	0	0	0	0	0	0	0	0	0	0	0	0	0	0	0	0	S	0	0	0	0	0	0	0	0	0	0	7	2	17.25	3.75
8EB0EB04D4	66	Male	0	0	0	1	33	19	34	0	0	0	18.6429	3.21429	0	0	0	0	0	0	0	0	0	0	0	0	0	0	0	0	0	0	13.7922	R	0	0	0	0	0	0	0	0	0	0	8	2	0	0
82D42DD6AE	81	Male	22.9306	2.81528	9.79306	0	134	18	0	1.8	7.5	4.1	5.78571	0.964286	14.6667	4.54167	7	3	7	0	0	0	14.2857	5.35714	0	0	0	0	0	0	30	6	173.896	S	0	0	0.888889	0	0	0	0	0	0	0	0	0	38.025	3.525
A8AA0EEBAD	59	Male	6.46736	3.19653	3.19653	1	26	18	45	0	10	4	10.9286	1.28571	22.5	3.5	0	0	0	0	0	0	0	0	0	0	0	0	0	0	0	0	42.7944	R	0	0	0.222222	0	0	0	0	0	0	0	0	0	0	0
BD428E7307	61	Male	1.89375	0	0	0	18	2	1	0	0	0	0	0	3.33333	1.33333	0	0	0	0	0	0	0	0	0	0	0	0	0	0	0	0	6.58031	R	0	0	0.222222	0	0	0	0	0	0	0	0	0	0	0
85669BF963	74	Male	35.1604	14.0222	15.6313	2	35	49	49	0	31.4	6.4	0	0	24.3333	2.33333	0	0	0	0	0	0	16.0714	3.57143	0	0	0	0	0	0	0	0	16.8057	R	0	0	0.611111	0	0	0	0	0	0	0	20.4167	2.91667	5.5	2.5
4BAAEC1A72	71	Female	21.5472	0	0	1	14	25	25	0	0	0	14.7857	2.25	2.33333	0.666667	0	0	0	0	0	0	0	0	0	0	0	0	0	0	11	1	11.2437	R	0	0	0.388889	0	0	0	0	0	0	0	8.5	1.5	0	0
96DC72DEA7	26	Male	5.76319	0	0	1	39	20	31	0	0	0	0	0	0	0	0	0	0	0	0	0	0	0	0	0	0	0	0	0	0	0	5.86674	R	0	0	0	0	0	0	0	0	0	0	6	2	28	4
CAA9E7779B	35	Female	7.15069	0	0	0	29	30	30	0	8	1	35.6786	3.53571	0	0	0	0	0	0	0	0	0	0	0	0	0	0	0	0	0	0	0	S	0	0	0	0	0	0	0	0	0	0	12.75	3.75	0	0
A162BACE91	61	Female	2.83611	0	0	7	42	4	42	0	0	0	0	0	5.5	2	0	0	0	0	0	0	0	0	0	0	0	0	0	0	4	1	7.4909	R	0	0	0	0	0	4.5	2.5	0	0	0	0	0	0	0
AAB92D743C	46	Male	13.784	0	2.84861	0	9	14	14	0	0	0	0	0	0	0	0	0	3	0	0	0	7.14286	1.78571	0	0	0	0	0	0	0	0	4.9181	R	0	0	0.277778	0	0	0	0	0	0	0	14.1667	1.66667	0	0
6324EFE9D4	90	Female	0	0	0	1	8	5	9	0	0	0	0	0	4.66667	0.666667	0	0	0	0	0	0	0	0	0	0	0	0	0	0	0	0	9.74602	R	0	0	0	0	0	0	0	0	0	0	0	0	0	0
0E45F56405	64	Male	35.5389	13.8042	23.7674	1	28	59	59	0	42	10	0	0	39.8333	3.08333	32	5	3	0	0	0	0	0	0	0	0	0	0	0	0	0	20.683	R	0	0	0.555556	0	0	0	0	0	0	30	2.91667	1.66667	0	0
1DE2A165C0	88	Female	70.7153	1.72639	1.72639	0	434	433	435	1.2	32	7	16.3929	1.92857	47.5	6.66667	35	6	1	0	0	0	0	0	0	0	0	0	0	0	0	0	490.884	S	0	0	0.916667	0	0	0	0	0	0	0	37.25	4	56	8
5DA6115FC5	85	Female	38.0215	0	0	1	16	0	44	0	0	0	23.1429	2.89286	2.83333	1	0	0	0	0	0	0	0	0	0	0	0	0	0	0	33	8	188.679	R	0	0	0	0	0	0	0	0	0	0	0	0	20	5
2BA677C031	70	Male	38.0069	0	0	0	236	286	139	0	0	0	62.6786	9.64286	41.6667	5.91667	5	2	6	5.5	0	0	0	0	0	0	0	0	0	0	9	1	51.4283	S	0	0	0.611111	0	0	0	0	0	0	0	19.25	5.75	85.75	12.75
C28B9670C3	72	Female	8.06181	0	0	1	11	28	28	0	12	4	19.9286	2.57143	6.16667	1.5	0	0	0	0	0	0	0	0	0	0	0	0	0	0	0	0	25.4127	R	0	0	0	0	0	0	0	0	0	0	6.5	2	0	0
302CB809E7	90	Female	75.6757	4.96389	23.5382	2	72	67	71	2.4	65	13	13.8214	2.25	36.5	6.5	8	2	2	0	0	0	0	0	0	0	0	0	0	0	11.5	1.5	4.66922	R	0	0	0.555556	0	0	0	0	0	0	0	0	0	31	8.5
94D64E73A4	89	Female	5.04444	0	1.09722	0	5	6	6	0	8	4	7.07143	3.21429	1.5	0.75	0	0	0	0	0	0	0	0	0	0	0	0	0	0	5.5	1.5	10.5701	R	0	0	0	0	0	0	0	0	0	0	0	0	7.5	1.5
53E82D25F5	88	Male	2.60833	0	0	0	11	10	11	0	0	0	0	0	6.16667	0.666667	0	0	2	0	0	0	0	0	0	0	0	0	0	0	0	0	8.62538	R	0	0	0	0	0	0	0	0	0	0	0	0	0	0
548A7C84CE	71	Male	21.3632	10.1403	13.1771	1	16	16	16	0	6.4	3.4	6.42857	2.57143	11.6667	2.16667	0	0	0	0	0	0	7.14286	3.57143	0	0	0	0	0	0	7.5	1.5	12.9928	R	0	0	0.722222	0	0	3	2	0	0	0	0	0	0	0
A4A94B17FF	58	Male	15.9313	0	2.04861	2	13	31	42	0	16	6	13.8214	1.28571	2.33333	1.33333	0	0	1	0	0	0	0	0	0	0	0	0	0	0	0	0	0	S	0	0	0.416667	0	0	0	0	0	0	0	17.9167	1.66667	12.25	3.25
A17AA02215	82	Female	30.1208	17.9403	17.9403	0	34	39	45	0	36	3	12.5357	1.92857	26.6667	3.66667	0	0	2	2.4	0	0	0	0	0	0	0	0	0	0	0	0	30.0523	R	0	0	0.75	0	0	0	0	0	0	0	0	0	0	0
2AC8B6710F	55	Male	0	0	0	5	5	1	22	0	0	0	0	0	18.5	5.25	1	1	0	0	0	0	0	0	0	0	0	0	0	0	0	0	0	S	0	0	0	0	0	0	0	0	0	0	0	0	0	0
C94DB2063F	74	Female	5.5875	0	0	0	14	7	14	0	8.4	2.4	0	0	12.3333	1.33333	0	0	0	0	0	0	0	0	0	0	0	0	0	0	0	0	0	S	0	0	0	0	0	0	0	0	0	0	0	0	0	0
27D0EC8069	76	Male	28.1451	12.9389	12.9389	0	20	42	52	0	8	2	15.75	1.60714	41	6	0	0	0	0	0	0	28.5714	5.35714	0	0	0	0	0	0	0	0	5.73634	R	0	0	0.555556	0	0	0	0	0	0	0	0	0	0	0
58BE3AC5D2	31	Female	9.89653	4.56597	6.50833	0	12	12	12	0	0	0	0	0	15.6667	4.33333	9	2	0	0	0	0	16.0714	3.57143	0	0	0	0	0	0	0	0	8.72063	R	0	0	0.583333	0	0	0	0	0	0	0	0	0	6.75	2.25
5E5C1AFA23	75	Male	6.09028	0	0	3	16	16	0	0	0	0	0	0	9.33333	3.83333	0	0	0	0	0	0	0	0	0	0	0	0	0	0	0	0	16.491	R	0	0	0.272222	0	0	0	0	0	0	0	4	1	8	2
C025A89AED	76	Male	26.2722	10.0514	10.0514	1	24	16	32	0	13.4	2.4	0	0	17.3333	1.33333	0	0	2	0	0	0	0	0	0	0	0	0	0	0	0	0	14.2202	R	0	0	0	0	0	0	0	0	0	0	0	0	0	0
10C7F1A09B	63	Female	0	0	0	3	10	2	4	0	0	0	0	0	0	0	0	0	0	0	0	0	0	0	0	0	0	0	0	0	0	0	0	S	0	0	0	0	0	4.5	1.5	0	0	0	0	0	0	0
8EE17983CC	68	Male	20.8028	0	1.94861	0	16	25	25	0	18	3	0	0	6	2	0	0	2	0	0	0	0	0	0	0	0	0	0	0	0	0	8.55753	R	0	0	0.277778	0	0	0	0	0	0	0	0	0	35	3.5
F2EC10B583	77	Female	17.4333	5.80556	11.8361	0	14	17	17	0	26	4	0	0	4.83333	0.833333	0	0	0	0	0	0	0	0	0	0	0	0	0	0	7.5	1.5	5.9184	R	0	0	0.166667	0	0	0	0	0	0	0	0	0	20.25	3.75
4B453C92AB	68	Female	0	0	0	0	3	3	3	0	0	0	0	0	2	0.5	0	0	0	0	0	0	0	0	0	0	0	0	0	0	0	0	4.95043	R	0	0	0	0	0	0	0	0	0	0	0	0	0	0
8ABB43F4FA	66	Male	16.941	3.59583	3.59583	1	18	16	22	0	0	0	0	0	6.83333	0.833333	8	2	0	0	0	0	0	0	0	0	0	0	0	0	5	1	6.17553	R	0	0	0.861111	0	0	0	0	0	0	0	0	0	18.5	3.5
3DDEC8D49F	83	Male	3.09236	0	0	0	4	4	4	0	0	0	0	0	3.66667	1	0	0	2	0	0	0	0	0	0	0	0	0	0	0	0	0	6.50762	S	0	0	0	0	0	0	0	0	0	0	0	0	0	0
E33E42658C	55	Male	35.3097	2.7625	15.3854	2	2	32	32	0	28.5	4.5	1.60714	1.60714	10.3333	1.33333	0	0	0	0	0	0	17.8571	5.35714	0	0	0	0	0	0	17	2	11.9922	R	0	0	0	0	0	0	0	0	0	0	0	0	37	4
870DF85F84	88	Male	13.45	0	1.41597	1	14	14	0	0	4.4	2.4	0	0	8.5	1	0	0	0	0	0	0	0	0	0	0	0	0	0	0	17.5	3.5	12.4886	R	0	0	0	0	0	0	0	0	0	0	0	0	7.75	1.75
E07CDD598C	86	Male	51.8167	15.4208	18.4243	0	33	42	42	0	45.5	5	0	0	40.3333	1.33333	0	0	0	0	0	0	0	0	0	0	0	0	0	0	0	0	21.84	R	0	0	0.194444	0	0	0	0	0	0	0	10.4167	2.91667	2	2
A48B810033	55	Male	13.2243	6.73542	6.73542	1	20	19	20	0	10.4	2.4	8.03571	2.57143	13.8333	1.83333	9	2	0	0	0	0	14.2857	7.14286	0	0	0	0	0	0	0	0	12.3737	R	0	0	0	0	0	0	0	0	0	0	0	0	0	0
16A79BA9CA	77	Male	0	0	0	0	0	0	0	0	0	0	1.28571	1.28571	2	2	0	0	0	0	0	0	0	0	0	0	0	0	0	0	0	0	4.6244	R	0	0	0	0	0	0	0	0	0	0	0	0	0	0
7DFBF24ECB	64	Male	0	0	0	4	15	3	11	0	0	0	3.21429	1.28571	0	0	0	0	0	0	0	0	0	0	0	0	0	0	0	0	0	0	0	S	0	0	0	0	0	2.5	1.5	0	0	0	0	0	0	0
5FECD13F58	54	Male	8.41806	0	0	1	57	10	32	0	0	0	3.21429	1.92857	10.5	3	5	2	0	0	0	0	0	0	0	0	0	0	0	0	8	3	14.6333	R	0	0	0	0	0	0	0	0	0	0	0	0	0	0
6390E06026	47	Female	6.82083	0	0	1	7	7	7	0	0	0	0	0	4.16667	0.666667	0	0	0	0	0	0	16.0714	3.57143	0	0	0	0	0	0	0	0	4.84647	R	0	0	0	0	0	0	0	0	0	0	0	0	0	0
59D5858F24	49	Male	20.2597	3.98889	16.6229	0	32	29	34	0	14.4	3.4	6.10714	1.28571	27.5	3	8	2	0	0	0	0	0	0	0	0	0	0	0	0	0	0	24.7646	S	0	0	0.361111	0	0	0	0	0	0	0	0	0	14	2
10376343B3	68	Male	3.34653	0	0	1	16	15	16	0	0	0	16.7143	1.28571	0	0	5	2	0	0	0	0	0	0	0	0	0	0	0	0	0	0	13.5205	R	0	0	0	0	0	0	0	0	0	0	0	0	0	0
D8D7D02167	33	Male	2.91806	0	0	0	5	0	6	0	0	0	0	0	10.1667	2.16667	0	0	0	0	0	0	0	0	0	0	0	0	0	0	0	0	6.92031	R	0	0	0	0	0	0	0	0	0	0	0	0	0	0
1073F91907	68	Male	19.3785	1.94236	1.94236	0	8	22	24	0	7.4	4.4	0.321429	0.321429	17	2.33333	10	2	0	0	0	0	7.14286	5.35714	0	0	0	0	0	0	0	0	10.5529	R	0	0	0.333333	0	0	0	0	0	0	0	0	0	0	0
3B2C633E88	77	Male	0	0	0	1	14	6	14	0	0	0	2.25	1.28571	5.5	0.833333	0	0	0	0	0	0	0	0	0	0	0	0	0	0	0	0	0	S	0	0	0	0	0	0	0	0	0	0	0	0	10	2.5
ABBE1E141B	89	Male	5.83542	0	0	0	13	9	39	0	0	0	0	0	0	0	0	0	0	0	0	0	0	0	0	0	0	0	0	0	7	1	2.84657	R	0	0	0	0	0	0	0	0	0	0	17.5	4	17.75	1.75
F390ED03B7	73	Male	48.2181	6.87292	18.2542	0	15	18	21	1.2	34.5	11	0	0	12.25	2.5	0	0	0	0	0	0	0	0	0	0	0	0	0	0	30.5	4.5	6.90705	R	0	0	0.277778	0	0	0	0	0	0	0	42.625	6.375	6.5	4
92E73DD8C5	89	Male	63.3687	2.01528	50.9583	0	55	55	57	0	39.8	5.8	5.14286	2.25	13	3	8	2	4	0	0	0	0	0	7	2	0	0	0	0	21	3	25.7787	R	0	0	0.833333	0	0	0	0	0	0	0	11.25	2.25	21.5	2
87370C81D5	85	Female	30.4521	1.96389	1.96389	1	18	32	32	2.4	20	2	0	0	20.5833	3.58333	0	0	7	0	0	0	0	0	0	0	0	0	0	0	0	0	8.85272	R	0	0	0.111111	0	0	0	0	0	0	0	0	0	7	2.5
122B68593B	72	Male	6.59653	2.94444	4.62847	1	10	15	15	0	14	8	0	0	6.66667	0.666667	4	2	0	0	0	0	12.5	3.57143	0	0	0	0	0	0	0	0	14.2639	R	0	0	0	0	0	0	0	0	0	0	0	0	9	4.5
9CFC21BB1A	58	Male	0	0	0	3	17	15	19	0	0	0	0	0	7.33333	1.33333	0	0	0	0	0	0	0	0	0	0	0	0	0	0	0	0	13.6452	R	0	0	0	0	0	0	0	0	0	0	7	3	3.5	2
23197DA797	75	Female	16.5375	0	0	1	32	13	81	0	0	0	0.321429	0.321429	18.5	1.5	0	0	0	0	0	0	33.9286	3.57143	0	0	0	0	0	0	0	0	0	S	0	0	0	0	0	0	0	0	0	0	18.5	1.5	6.5	2
AF7B076858	34	Female	6.29722	0	0	8	23	12	25	0	4.5	3	0	0	22.8333	1.83333	0	0	0	0	0	0	0	0	0	0	0	0	0	0	0	0	14.6742	R	0	0	1.17677	0	0	0	0	0	0	0	0	0	3.5	2
35DC30584D	76	Male	17.7278	10.6833	10.6833	1	85	0	25	0	13	2	0	0	8.33333	1.83333	10.5	3	0	0	0	0	0	0	0	0	0	0	0	0	13.5	2.5	17.6635	R	0	0	0	0	0	0	0	0	0	0	0	0	13.5	1.5
1DA3B24549	81	Female	11.1806	0	0	1	12	12	12	0	0	0	0	0	13.25	1.25	0	0	3	0	0	0	0	0	0	0	0	0	0	0	0	0	10.7194	R	0	0	0	0	0	0	0	0	0	0	0	0	0	0
A8949A97A3	81	Female	5.53819	0	0	2	7	7	8	0	0	0	0	0	11.3333	3.33333	0	0	3	0	0	0	0	0	0	0	0	0	0	0	0	0	10.4153	R	0	0	0.25	0	0	0	0	0	0	0	0	0	0	0
1.40405e+96	64	Female	21.7771	4.98889	4.98889	2	1	49	49	0	0	0	20.5714	1.28571	30.5833	2.58333	8	3	0	0	0	0	17.8571	5.35714	0	0	0	0	0	0	0	0	38.7831	R	0	0	0.222222	0	0	0	0	0	0	0	0	0	0	0
3538350AF3	80	Male	0	0	0	0	4	4	4	0	0	0	0	0	2.66667	0.666667	0	0	0	0	0	0	0	0	0	0	0	0	0	0	0	0	4.63079	R	0	0	0	0	0	0	0	0	0	0	0	0	0	0
E58AB7414B	70	Female	0	0	0	6	11	11	11	0	0	0	0	0	5	1	0	0	0	0	0	0	0	0	0	0	0	0	0	0	0	0	0	S	0	0	0	0	0	0	0	0	0	0	0	0	9.5	2
B2880A5E7E	74	Female	9.29375	0	0	0	37	30	37	0	0	0	9.96429	1.28571	0	0	0	0	2	0	0	0	0	0	0	0	0	0	0	0	0	0	2.888	R	0	0	0	0	0	0	0	0	0	0	30	3	0	0
159308E560	84	Male	16.1	0	0	0	14	24	30	0	0	0	4.17857	1.28571	11.1667	2	0	0	0	0	0	0	0	0	0	0	0	0	0	0	20.1667	4.16667	574.523	R	0	0	0.222222	0	0	0	0	0	0	0	1	1	0	0
7DA206A9F0	67	Male	32.0924	1.99722	9.13889	0	6	39	39	0	42	3	0	0	2.16667	0.666667	9	2	0	0	0	0	0	0	0	0	0	0	0	0	2.25	0.75	42.9735	R	0	0	0	0	0	0	0	0	0	0	68.25	3	12.5	2
9DD1A1ED90	96	Male	83.1986	1.88542	14.5708	0	82	88	88	0	38.4	8.4	0	0	25.3333	4.83333	0	0	0	0	0	0	35.7143	5.35714	0	0	0	0	0	0	20	2	0	S	0	0	0.666667	0	0	0	0	0	0	0	29.7917	5.41667	38	7
EA4A32902D	33	Male	37.0063	4.99792	16.0903	3	32	32	32	0	12	4	9	1.28571	5.41667	0.875	0	0	0	0	0	0	8.92857	3.57143	0	0	0	0	0	0	0	0	17.5043	R	0	0	0.222222	0	0	0	0	0	0	0	4	3	12.5	1.5
816E1A93A8	31	Male	12.8986	0	0	0	16	16	0	0	0	0	6.10714	1.28571	0	0	12	2	0	0	0	0	0	0	0	0	0	0	0	0	5.5	1.5	0	S	0	0	0	0	0	0	0	0	0	0	0	0	20	3.5
30FEFD90B1	65	Male	0	0	0	0	0	0	15	0	0	0	0	0	12.25	1	0	0	0	0	0	0	0	0	0	0	0	0	0	0	0	0	0	S	0	0	0	0	0	0	0	0	0	0	0	0	0	0
FA0CA89B6C	80	Female	41.5326	0	0	0	62	244	463	0	14	2	10.9286	1.92857	37.5833	2.58333	29	4	0	0	0	0	0	0	0	0	0	0	0	0	0	0	10.3428	R	0	0	0.222222	0	0	0	0	0	0	0	0	0	42	6
13FA215B29	85	Male	24.0757	1.09931	9.3	0	3	21	6	2.4	29.4	6.4	10.9286	1.28571	4.33333	1.66667	0	0	0	0	0	0	0	0	0	0	0	0	0	0	11.5	1.5	11.5337	R	0	0	0.25	0	0	0	0	0	0	0	0	0	17	5
5796602B14	78	Female	6.20208	0	0	0	9	8	8	0	12	3	0	0	0	0	2	2	0	0	0	0	0	0	0	0	0	0	0	0	0	0	4.93212	R	0	0	0	0	0	0	0	0	0	0	9	2	0	0
5F6B3F7CA1	64	Female	0	0	0	2	11	2	3	0	0	0	0	0	0	0	0	0	0	0	0	0	0	0	0	0	0	0	0	0	0	0	0	S	0	0	0	0	0	3	1	0	0	0	0	0	0	0
A825849859	74	Male	0	3.66944	3.66944	0	7	7	7	0	6.4	2.4	0	0	6.66667	1.66667	0	0	0	0	0	0	0	0	0	0	0	0	0	0	0	0	15.7371	R	0	0	0	0	0	2.5	1.5	0	0	0	0	0	0	0
3BEAF8A474	88	Male	30.6042	9.14722	34.1396	0	15	23	23	3.2	30	6	18	2.57143	16.25	2	3	1	0	0	0	0	0	0	0	0	0	0	0	0	23.5	3.5	24.6981	S	0	0	0.444444	0	0	0	0	0	0	0	0	0	6	2
EDDB0F3BF4	92	Male	28.9646	3.07083	3.07083	0	26	0	8	0	48	4	7.07143	3.21429	6.66667	1.16667	0	0	0	0	0	0	0	0	0	0	0	0	0	0	7.5	3.5	28.745	R	0	0	0	0	0	0	0	0	0	0	32.25	3	0	0
1F40F63B7E	69	Male	20.9403	13.7701	18.7312	1	22	22	22	0	19	3	16.0714	1.92857	13.3333	2.33333	5	1	5	0	0	0	35.7143	7.14286	0	0	0	0	0	0	0	0	22.2603	S	0	0	0.222222	0	0	0	0	0	0	0	1.66667	1.66667	0	0
65834E0B12	66	Female	7.12361	0	0	3	15	54	55	0	24	2	48.8571	7.71429	3.5	0.833333	0	0	0	0	0	0	25	8.92857	0	0	0	0	0	0	0	0	8.83687	R	0	0	0	0	0	0	0	0	0	0	0	0	0	0
BB05FAE352	87	Female	61.1514	0	22.9083	2	70	193	193	0	21.5	4.5	5.14286	1.28571	7	1.5	4.5	2.75	0	0	0	0	0	0	0	0	14.5	3	0	0	36	6	19.3812	R	0	0	0.833333	0	0	0	0	0	0	0	20.4167	2.91667	31.5	5.5
DB527454C8	72	Male	6.40417	0	1.14722	2	9	9	9	0	4.5	1.5	7.39286	2.57143	4.5	2.5	0	0	0	0	0	0	0	0	0	0	0	0	0	0	6	1	10.8389	R	0	0	0	0	0	0	0	0	0	0	0	0	3.5	2
2BBB31FC24	73	Male	11.9688	0	0	0	4	12	19	0	0	0	0	0	3.16667	0.666667	6	1	0	0	0	0	0	0	0	0	0	0	0	0	8.5	1.5	4.51771	R	0	0	0	0	0	0	0	0	0	0	0	0	18.5	2
856FCEADE5	85	Male	0	18.1688	23.675	0	27	24	24	0	27	3	0	0	9.5	0.5	0	0	0	0	0	0	0	0	0	0	0	0	0	0	19	1	12.8962	R	0	0	0.277778	0	0	0	0	0	0	0	7.5	1.5	0	0
767917EF3C	71	Male	23.641	0	0	1	56	64	64	0	11	5	0	0	40	6.5	0	0	1.5	1.33333	0	0	0	0	0	0	0	0	0	0	0	0	61.2914	S	0	0	0.388889	0	0	0	0	0	0	0	22.9167	1.66667	19	2.5
E0928FEFDE	72	Male	24.1167	0	3.08889	2	75	79	79	0	10	4	11.8929	1.28571	0	0	0	0	0	0	0	0	32.1429	3.57143	0	0	0	0	0	0	0	0	0	S	0	0	0.0555556	0	0	0	0	0	0	0	29.25	1.75	0	0
99079F01D8	58	Male	21.8854	2.45764	7.96181	0	14	0	14	0	0	0	0	0	12.5	3.5	0	0	0	0	0	0	0	0	0	0	0	0	0	0	11.5	1.5	0	S	0	0	0.444444	0	0	0	0	0	0	0	9.5	1.5	0	0
E2234713E2	72	Female	10.2285	0	0	3	32	18	41	0	0	0	5.14286	1.28571	22	5	0	0	0	0	0	0	0	0	0	0	0	0	0	0	2.5	1.5	12.791	R	0	0	0	0	0	0	0	0	0	0	0	0	0	0
4EA1F46F43	59	Male	30.0382	2.73264	2.73264	0	41	40	46	0	0	0	0	0	31.3333	3.16667	11	2	1.5	0	0	0	0	0	0	0	0	0	0	0	0	0	40.6176	R	0	0	0.25	0	0	0	0	0	0	0	2.25	1.25	0	0
1266E95DDA	86	Male	0	0	0	1	8	0	1	0	0	0	0	0	0	0	0	0	0	0	0	0	0	0	0	0	0	0	0	0	0	0	4.33791	R	0	0	0	0	0	0	0	0	0	0	2.5	1.5	0	0
FD1EFAA301	46	Male	15.3771	0	2.10972	0	2	0	0	0	0	0	5.14286	1.28571	0	0	0	0	3	0	0	0	0	0	0	0	0	0	0	0	9.5	2.5	7.68331	R	0	0	0	0	0	0	0	0	0	0	0	0	16.75	1.75
565BE2AA77	77	Male	29.8549	6.07292	11.0285	0	21	23	23	0	40	6	0	0	8.16667	0.666667	4	2	2	0	0	0	0	0	0	0	0	0	0	0	0	0	21.5366	R	0	0	0.361111	0	0	0	0	0	0	0	0	0	2.5	2.5
F82FC74BAC	82	Female	25.4	6.97153	6.97153	0	32	32	32	0	27	6	0	0	16.6667	0.666667	0	0	0	0	0	0	0	0	0	0	0	0	0	0	0	0	35.2852	R	0	0	0.166667	0	0	0	0	0	0	0	0	0	0	0
CD8BBFE193	65	Female	11.8688	0	0	0	44	0	45	0	0	0	0	0	6.16667	1.16667	0	0	0	0	0	0	0	0	11	2	0	0	0	0	11.5	1.5	33.7524	R	0	0	0	0	0	0	0	0	0	0	0	0	31.5	3
0F7355FB2F	76	Male	0	0	0	2	57	0	22	0	0	0	0	0	0	0	0	0	0	0	0	0	0	0	0	0	0	0	0	0	0	0	0	S	0	0	0	0	0	0	0	0	0	0	0	0	2	1
FA947DAC3E	68	Male	6.88819	0	0	0	1	12	12	0	0	0	3.21429	1.28571	4.16667	0.666667	0	0	0	0	0	0	0	0	0	0	0	0	0	0	0	0	3.68719	R	0	0	0.166667	0	0	0	0	0	0	0	0	0	0	0
2581C982B7	88	Male	48.866	0	43.9771	1	62	80	92	0	37.4	6.4	0	0	45.1667	9.41667	0	0	0	0	0	0	21.4286	3.57143	0	0	0	0	0	0	0	0	25.6691	S	0	0	1.11111	0	0	0	0	0	0	0	64.75	9.25	17.5	2.5
7ED8B5D009	82	Female	0	0	0	0	2	8	8	0	0	0	0	0	14	2	0	0	0	0	0	0	0	0	0	0	0	0	0	0	0	0	7.43378	R	0	0	0	0	0	0	0	0	0	0	0	0	0	0
7C492FC7B6	74	Female	0	0	0	0	0	0	6	0	4	4	6.10714	1.28571	0	0	0	0	0	0	0	0	0	0	0	0	0	0	0	0	0	0	0	S	0	0	0	0	0	0	0	0	0	0	0	0	1.5	1.5
B843385A35	92	Male	122.364	1.39444	120.069	0	86	107	108	0	108.8	12.8	0	0	7.5	2.5	0	0	0	0	0	0	0	0	0	0	0	0	0	0	23	8	18.7244	R	0	0	2.32071	0	0	0	0	0	0	0	89.5833	7.08333	53.5	5.5
AB55FFC628	75	Male	1.34028	0	0	0	0	1	1	0	0	0	0	0	1.16667	0.666667	3	2	0	0	0	0	0	0	0	0	0	0	0	0	0	0	0	S	0	0	0	0	0	0	0	0	0	0	0	0	0	0
B153081E4E	80	Male	42.359	12.9306	12.9306	0	54	54	54	0	22.4	6.4	6.10714	1.28571	23.1667	4.58333	0	0	2	0	0	0	0	0	0	0	0	0	0	0	0	0	4.70306	R	0	0	0.5	0	0	0	0	0	0	0	7.25	0.75	8	2
A86E9488F7	93	Male	73.5722	24.9625	55.9375	0	55	36	15	0	46.5	14.95	0	0	27	2.5	0	0	0	0	0	0	0	0	0	0	0	0	0	0	5	1	44.9802	S	0	0	1.05556	0	0	0	0	0	0	0	38.75	7.5	0	0
3D758D6EE2	80	Female	15.5285	3.62361	3.62361	0	38	0	38	0	17.5	2.5	17.3973	3.25446	5	0.5	0	0	0	0	0	0	0	0	0	0	0	0	0	0	13	2	0	S	0	0	0	0	0	0	0	0	0	0	0	0	0	0
978B045F0D	74	Male	3.44583	0	0	0	10	10	10	0	0	0	0	0	11.25	1.25	0	0	0	0	0	0	0	0	0	0	0	0	0	0	0	0	12.5708	R	0	0	0.222222	0	0	0	0	0	0	0	0	0	0	0
482F5E50C1	80	Male	15.7806	0	10.1444	0	43	46	51	0	0	0	0	0	15.5	2.25	0	0	0	0	0	0	0	0	0	0	0	0	0	0	7.5	1.5	13.8842	R	0	0	0.782828	0	0	0	0	0	0	0	21	2.75	21	1
5ACBB77B66	89	Female	0	0	11.9285	0	1	0	26	0	14	2	0	0	7.66667	0.666667	0	0	0	0	0	0	0	0	0	0	0	0	0	0	0	0	21.702	S	0	0	0.166667	0	0	0	0	0	0	0	0	0	19.5	1.5
5DF3C7F367	60	Male	22.2896	3.03472	24.734	3	22	22	22	0	11.4	7.4	5.82589	1.96875	3.83333	1.83333	0	0	0	0	0	0	21.4286	7.14286	0	0	0	0	0	0	0	0	7.99713	R	0	0	0.555556	0	0	0	0	0	0	17	17.9167	4.16667	0	0
F4506C4036	75	Female	5.93264	0	0	0	0	0	6	0	0	0	0	0	0	0	8	2	0	0	0	0	0	0	0	0	0	0	0	0	0	0	3.80749	R	0	0	0	0	0	0	0	0	0	0	0	0	11	2
EF93D420B5	91	Male	11.9417	0	0	1	247	225	240	0	0	0	0	0	9.41667	1.41667	0	0	3	0	0	0	0	0	0	0	0	0	0	0	0	0	54.6286	S	0	0	0.25	0	0	2.5	1.5	0	0	0	12.75	2.25	30.5	3.5
EA6A0C65CE	86	Female	8.85764	1.04028	2.27917	0	8	0	8	0	8	4	3.21429	1.28571	5.5	1	1	1	0	3.5	0	0	0	0	0	0	0	0	0	0	9.5	2.5	7.58822	R	0	0	0	0	0	0	0	0	0	0	0	0	0	0
5150CE5920	91	Male	10.6639	0	8.20694	1	8	45	19	0	0	0	0	0	36.4167	6.41667	5	2	0	0	0	0	0	0	0	0	0	0	0	0	11.5	1.5	163.729	S	0	0	0.222222	0	0	0	0	0	0	0	5	1	54.5	9.5
5E3D315EE7	86	Male	6.87222	0	0	2	61	3	43	0	0	0	0	0	17.5	2	6	1	0	0	0	0	0	0	0	0	0	0	0	0	0	0	0	S	0	0	0	0	0	0	0	0	0	0	5.75	0.75	3.5	2
304A411722	93	Female	42.6465	1.87778	8.93056	0	58	47	58	0	10.4	3.4	24.4286	5.78571	18.4167	6.66667	0	0	2	0	0	0	0	0	0	0	0	0	0	0	18	3	2.81102	R	0	0	0.722222	0	0	0	0	0	0	0	0	0	18.75	2.25
66AF861799	84	Male	69.3944	13.8063	39.8229	1	67	53	53	0	0	0	0	0	16.1667	2.66667	0	0	3	13	0	0	0	0	0	0	0	0	0	0	47	6	72.7643	R	0	0	0	0	0	0	0	0	0	0	0	0	42	3
2DDA331EEA	91	Female	25.6576	12.0604	13.9097	0	47	6	58	0	36.8	9.8	20.8929	4.5	13.5	1.25	0	0	0	0	0	0	0	0	0.3	0.3	0	0	0	0	6.5	1.5	0	S	0	0	0.333333	0	0	0	0	0	0	0	0	0	9	2
D8F25D0C77	75	Male	73.5771	25.5597	25.5597	0	240	324	0	0	11	3.4	50.1429	5.78571	44.5833	7.08333	105.417	10.0833	0	0	0	0	0	0	0	0	0	0	0	0	30.5	5.5	22.7607	R	0	0	0.5	0	0	0	0	0	0	0	0	0	9	2
6F4108CB5D	89	Male	0	0	0	1	26	11	26	0	0	0	17.0357	2.89286	8.16667	1.16667	0	0	0	0	0	0	0	0	0	0	0	0	0	0	0	0	0	S	0	0	0	0	0	0	0	0	0	0	0	0	0	0
F72FC5F994	87	Male	37.7458	0	0	0	36	38	44	0	0	0	0	0	22.75	1.75	0	0	0	0	0	0	0	0	0	0	0	0	0	0	10	1	43.6652	S	0	0	0	0	0	0	0	0	0	0	0	0	18.5	2.5
0004AEDE0E	52	Male	27.7444	8.25764	29.0715	9	40	26	40	0.8	30.4	6.4	15.75	4.82143	9.33333	1.33333	0	0	0	2.06667	0	0	30.3571	7.14286	0	0	0	0	0	0	10.5	1.5	0	S	0	0	0	26	2	0	0	0	0	0	0	0	7	2.5
D34035249B	86	Male	97.2597	0	12.9	0	155	215	102	3	9	3	7.71429	2.89286	10.75	2.5	19	7	8	0	0	0	0	0	0	0	0	0	0	0	33	3	17.8663	R	0	0	0.277778	0	0	0	0	0	0	0	91.25	14	116	21.5
E9F5CCC746	77	Female	9.48472	0	8.46806	0	12	41	39	0	23.4	3.4	20.5714	3.21429	0	0	8	2	0	0	0	0	0	0	0	0	0	0	0	0	10.5	2.5	29.5889	R	0	0	0	0	0	0	0	0	0	0	0	0	0	0
690881B6AD	82	Female	17.9194	9.76597	9.76597	0	12	12	12	0	3.5	1.4	0	0	20.5	4	0	0	0	0	0	0	0	0	0	0	0	0	0	0	0	0	13.5413	R	0	0	0.222222	0	0	0	0	0	0	0	0	0	0	0
D6D8D46E10	87	Male	33.5549	3.89444	7.86042	2	53	82	85	0	27	5.75	0	0	25.3333	2.33333	7	2	2	0	0	0	0	0	0	0	0	0	0	0	0	0	31.7275	S	0	0	0.166667	0	0	0	0	0	0	0	0	0	15	1.5
0173581B13	88	Male	0	0	0	0	7	0	7	0	0	0	8.35714	1.60714	0	0	0	0	0	0	0	0	0	0	0	0	0	0	0	0	0	0	0	S	0	0	0	0	0	0	0	0	0	0	0	0	0	0
E66C571E8A	66	Male	9.70347	2.02222	2.02222	0	8	8	8	0	10.5	4.5	2.89286	1.60714	10.6667	3.66667	10	2	0	0	0	0	0	0	0	0	0	0	0	0	0	0	15.5671	R	0	0	0	0	0	0	0	0	0	0	0	0	0	0
A3986A71F4	81	Male	7.97986	0	0	4	8	1	16	0	3.4	2.4	0	0	7	1	0	0	0	0	0	0	0	0	0	0	0	0	0	0	0	0	0	S	0	0	0	0	0	0	0	0	0	0	0	0	0	0
72014A2F21	85	Female	20.6326	0	0	3	73	4	140	0	21.8	4.8	25.7143	7.07143	6.16667	1.75	0	0	0	0	0	0	0	0	0	0	0	0	0	0	9	3	122.762	S	0	0	0	0	0	0	0	0	0	0	9	2.25	23.5	5.5
D34E3F5684	85	Male	5.96528	1.00903	5.96528	3	19	15	20	0	2.4	2.4	0	0	7.16667	2.66667	0	0	3.5	0	0	0	0	0	0	0	0	0	0	0	7.5	1.5	22.711	R	0	0	0.166667	0	0	0	0	0	0	0	3.5	1.5	0	0
4ABEECFE24	90	Male	23.725	0	0	0	16	26	26	2.4	1	0.5	9.64286	1.92857	12.5	1.5	6	2	0	0	0	0	0	0	0	0	0	0	0	0	25.5	4.5	2.94071	R	0	0	0	0	0	0	0	0	0	0	0	0	1.5	1.5
D443DDF972	88	Male	61.7972	16.7444	52.766	0	38	38	38	0.6	13.4	2.4	0	0	10.5	2.66667	5	2	12.5	0	0	0	0	0	0	0	0	0	0	0	7	1	22.6889	S	0	0	1.22222	0	0	0	0	0	0	0	44.0833	7.08333	0	0
4C76CE61DF	89	Male	117.833	30.1667	88.6174	2	389	584	597	4.8	78.55	18.05	6.42857	3.21429	103.333	20	0	0	7	0	0	0	123.214	23.2143	0	0	0	0	0	0	0	0	22.8697	R	0	0	1.55556	9	5	13	2.75	0	0	0	29.3333	9.08333	110.5	13
044F1D68E1	90	Male	86.1868	28.5431	36.7083	0	98	92	65	0	118	14	0	0	32.1667	5.16667	0	0	5	0	0	0	0	0	0	0	0	0	0	0	9.5	2.5	98.8021	R	0	0	0.472222	0	0	0	0	0	0	0	96.0833	9.83333	0	0
D6D010A718	71	Male	0	0	0	9	23	0	0	0	0	0	0	0	9.25	4.75	0	0	0	0	0	0	0	0	0	0	0	0	0	0	0	0	0	S	0	0	0	0	0	0	0	0	0	0	0	0	0	0
04EAE3D91F	81	Female	10.1132	0	6.86528	0	19	19	20	0	22	6	0	0	5.5	0.5	0	0	0	0	0	0	0	0	0	0	0	0	0	0	0	0	15.5434	R	0	0	0.222222	0	0	0	0	0	0	0	16.125	4.875	0	0
6220757021	83	Male	81.4299	5.70833	14.7472	1	800	970	584	0	22.4	5.4	46.2857	10.6071	130.833	14.8333	75	21	0	0	0	0	0	0	0	0	0	0	0	0	100	14	191.497	S	0	0	2.29798	0	0	38.625	9.625	0	0	0	113	17	81.25	11.25
4BAE3244E2	87	Male	0	0	0	0	38	38	38	0	0	0	0	0	5.66667	0.666667	0	0	0	0	0	0	0	0	0	0	0	0	0	0	0	0	21.5377	R	0	0	0	0	0	4.25	0.75	0	0	0	0	0	0	0
573A48A594	61	Female	10.0597	0	0	1	18	18	18	0	0	0	9	1.28571	5.5	0.5	0	0	0	0	0	0	0	0	0	0	0	0	0	0	4.5	1.5	14.2763	R	0	0	0	0	0	0	0	0	0	0	0	0	0	0
EDC4627413	86	Male	105.985	23.9021	30.8285	0	139	246	246	3.6	19	5	59.7857	8.35714	120.333	14.3333	0	0	3	0	0	0	46.4286	7.14286	0	0	0	0	0	0	7.5	1.5	115.576	S	0	0	1.80556	0	0	7.25	0.75	0	0	0	0	0	62.5	7
13B0A49553	90	Male	8.40417	2.13958	2.13958	0	9	18	18	0	4.4	2.4	9	1.28571	6.75	1.5	0	0	0	0	0	0	8.92857	3.57143	0	0	0	0	0	0	6.5	1.5	20.9079	R	0	0	0	0	0	0	0	0	0	0	0	0	0	0
A589050FD2	93	Female	27.3111	0	14.0396	0	28	28	28	0	3.4	2.4	0	0	9.33333	2.33333	23.25	5.08333	0	0	0	0	0	0	0	0	0	0	0	0	9.5	2.5	24.2253	R	0	0	0.444444	0	0	0	0	0	0	0	14.25	3	19	4
250AEC30E7	90	Male	0	0	0	0	6	8	8	0	0	0	0	0	4.66667	0.666667	0	0	0	0	0	0	0	0	0	0	0	0	0	0	0	0	9.29341	R	0	0	0	0	0	0	0	0	0	0	0	0	0	0
AE986589F9	90	Female	51.0729	12.6292	28.6194	0	27	32	27	3.6	37.4	5.4	4.5	1.28571	14.3333	3.5	0	0	3	0	0	0	0	0	0	0	0	0	0	0	11	3	15.6255	R	0	0	0.888889	0	0	0	0	0	0	0	56.375	9.875	0	0
CCF3162B70	87	Male	3.32986	0	0	1	34	73	30	0	0	0	0	0	9.66667	1.16667	0	0	0	0	0	0	0	0	0	0	0	0	0	0	5.5	2.5	36.0031	R	0	0	0	0	0	0	0	0	0	0	0	0	62	9.5
4A5EF88496	61	Female	0	0	0	1	17	34	34	0	0	0	10.6071	2.89286	12.4167	1.91667	0	0	0	0	0	0	0	0	0	0	0	0	0	0	0	0	0	S	0	0	0.111111	0	0	0	0	0	0	0	7	3	5	2
75643EE439	91	Male	22.0257	0	0	0	25	7	20	0	26	4	0	0	7	1.5	0	0	0	0	0	0	0	0	0	0	0	0	0	0	7.16667	1.83333	0	S	0	0	0	0	0	0	0	0	0	0	35.25	6	0	0
71EB0E26EC	94	Male	3.63542	1.73681	1.73681	0	5	4	4	0	9	3	0	0	5.25	1.25	0	0	0	0	0	0	0	0	0	0	0	0	0	0	3	1	6.86823	R	0	0	0	0	0	0	0	0	0	0	0	0	0	0
B415E53435	93	Male	10.7847	4.60833	8.83403	0	14	14	0	0	8.4	2.4	0	0	6	1.16667	0	0	0	0	0	0	0	0	0	0	0	0	0	0	13	4	11.5705	R	0	0	0.166667	0	0	0	0	0	0	0	0	0	8	2
8947F604B5	95	Male	11.7903	3.18819	3.18819	0	12	12	12	0	0	0	0	0	10	2	0	0	0	0	0	0	7.14286	3.57143	0	0	0	0	0	0	0	0	11.7738	R	0	0	0.305556	0	0	0	0	0	0	0	0	0	0	0
B240F97654	87	Female	3.96667	0	0	0	4	4	4	0	0	0	0	0	1.33333	1.33333	0	0	0	0	0	0	0	0	0	0	0	0	0	0	5	1	4.73853	R	0	0	0.166667	0	0	0	0	0	0	0	0	0	8	2
9A6483BA3C	86	Male	18.125	0	0	0	16	20	29	0	17.4	2.4	8.03571	1.28571	4.16667	0.666667	8	2	0	0	0	0	0	0	0	0	0	0	0	0	0	0	0	S	0	0	0	0	0	0	0	0	0	0	0	0	20	2
9484657146	96	Male	206.46	2.21528	66.6319	0	339	434	238	1.475	86.85	11.1	30.6964	2.73214	79.0833	10.5833	11	4	2	0	0	0	21.4286	1.78571	1.66667	1.66667	18.75	3.75	0	0	119.917	17.1667	33.743	S	0	0	1.28788	0	0	0	0	0	0	0	149.433	16.5417	72.25	8.75
7D177FAE54	82	Male	36.4951	13.1597	13.1597	0	25	46	46	0	18	1	0	0	8.16667	0.5	0	0	0	0	0	0	0	0	0	0	0	0	0	0	0	0	44.37	R	0	0	0.416667	0	0	0	0	0	0	0	0	0	0	0
6ECBB98DE6	88	Male	32.2944	0	10.1285	0	30	64	64	0	31.4	3.9	19.2857	2.89286	0	0	0	0	2	0	0	0	0	0	0	0	0	0	0	0	0	0	0	S	0	0	2.19949	0	0	0	0	0	0	1.66667	16.25	5	0	0
D894094BB5	78	Male	32.1236	0	3.93819	1	122	262	166	0	0	0	0.321429	0.321429	13.3333	2.33333	0	0	1.5	0	0	0	28.5714	7.14286	0	0	0	0	0	0	0	0	601.891	S	0	0	1.05556	0	0	0	0	0	0	0	32	6	102.5	11.5
5FD5520393	62	Female	0	0	0	1	18	10	18	0	0	0	0	0	0	0	0	0	0	0	0	0	0	0	0	0	0	0	0	0	0	0	0	S	0	0	0	0	0	0	0	0	0	0	12	2	0	0
9CD4E1D585	86	Male	151.956	70.2778	493.685	0	139	146	146	7.6	69.7	15.7	66	0	39	7.41667	150	10	8	0	0	0	101.786	25	147	9	0	0	0	0	0	0	3.77326	R	0	0	1.55556	0	0	0	0	0	0	0	49.6667	11.9167	20	2
C75D8EE9D8	78	Male	164.175	0	14.7208	1	426	756	313	20.4	122.8	26.3	12.2143	1.92857	9.16667	2.41667	18	4	10	0	0	0	14.2857	3.57143	0	0	0	0	0	0	0	0	513.845	S	0	0	0.166667	0	0	5.75	0.75	0	0	0	112	14.75	409	53.5
000A38A42D	50	Male	0	0	0	2	17	18	20	0	0	0	0	0	12	1	0	0	0	0	0	0	0	0	0	0	0	0	0	0	0	0	14.9464	R	0	0	0	0	0	0	0	0	0	0	3	2	0	0
CBC1BE769D	85	Female	42.0493	0	12.0444	0	34	44	44	0	30	5	0	0	13	1	0	0	1.5	0	0	0	5.35714	3.57143	0	0	0	0	0	0	0	0	0	S	0	0	1.02778	0	0	0	0	0	0	0	6.66667	1.66667	0	0
F46442DD46	76	Male	49.0458	0	1.55694	1	183	44	304	6.6	95.5	14.5	29.5714	4.5	0	0	16	6	2	0	0	0	0	0	0	0	0	0	0	0	3.5	1.5	11.7984	R	0	0	0.222222	0	0	16	3.5	0	0	0	21	5	57.5	3.5
75812F5564	64	Male	9.21319	4.83333	4.83333	0	14	15	15	0	17.4	2.4	0	0	8.66667	2.66667	0	0	0	0	0	0	0	0	0	0	0	0	0	0	6.5	1.5	15.8268	R	0	0	0.111111	0	0	0	0	0	0	0	0	0	15.5	2
758060FDB8	68	Male	9.53819	0	4.65486	0	31	8	12	0	7.4	2.4	0	0	0	0	0	0	0	0	0	0	0	0	0	0	0	0	0	0	11.5	1.5	4.59433	R	0	0	0	0	0	0	0	0	0	0	0	0	17	2
2BCC1D6205	81	Male	7.70139	0	0	0	1	28	30	0	0	0	14.1429	2.57143	19	2	0	0	0	0	0	0	0	0	0	0	0	0	0	0	0	0	3.88193	R	0	0	0	0	0	0	0	0	0	0	0	0	0	0
CDD88057EA	79	Male	57.0042	0	23.4354	3	92	95	109	0	78.4	6.4	0	0	22.3333	1.33333	7.5	1.25	2	0	0	0	0	0	0	0	0	0	0	0	0	0	14.456	R	0	0	0.833333	15	3	0	0	0	0	0	15	0.75	16.5	2.5
827FE7647E	93	Male	12.4972	0	3.91528	0	17	17	17	0	10.5	6	0	0	0	0	0	0	0	0	0	0	8.92857	7.14286	0	0	0	0	0	0	0	0	11.1421	R	0	0	0.972222	0	0	0	0	0	0	0	0	0	24	4.5
24FD844A9F	80	Male	10.6819	1.825	1.825	1	11	11	11	0	26	4	0	0	8.75	1.5	0	0	2	0	0	0	0	0	0	0	0	0	0	0	0	0	13.8072	R	0	0	0	0	0	0	0	0	0	0	0	0	0	0
3757D985E7	65	Female	22.759	0	1.03889	0	0	0	18	0	0	0	0	0	11.25	3.75	0	0	0	0	0	0	0	0	0	0	0	0	0	0	33.5	5.83333	8.61825	R	0	0	0.5	0	0	0	0	0	0	0	0	0	27.5	6.5
06226E796E	77	Female	23.0319	0	6.2625	3	11	18	20	0	0	0	0	0	9.16667	2.16667	0	0	3	0	0	0	17.8571	3.57143	0	0	0	0	0	0	13	3	16.9457	R	0	0	0.333333	0	0	2.5	1.5	0	0	0	0	0	13	2.5
775FEA27D8	56	Male	11.6042	2.00625	3.95	1	23	18	33	0	20	4	9.96429	1.28571	4	1	0	0	0	0	0	0	0	0	0	0	0	0	0	0	6	1	0	S	0	0	0	0	0	2.5	1.5	0	0	0	0	0	9.5	2
3FA8CCC5A9	80	Female	8.10486	0	0	0	13	14	14	0	8.4	2.4	0	0	0	0	4	2	3	0	0	0	0	0	0	0	0	0	0	0	0	0	0	S	0	0	0	0	0	0	0	0	0	0	5	2	14	2
0345F933E2	65	Male	25.7729	6.82917	12.8069	2	24	26	26	0	21	8.5	2.25	1.28571	9.66667	1.16667	0	0	0	0	0	0	0	0	0	0	0	0	0	0	13	3	17.7291	R	0	0	0.444444	0	0	0	0	0	0	0	0	0	0	0
B1C3506785	35	Female	23.2889	0	5.03958	0	27	68	13	0	34.5	6.5	0	0	3.33333	1.33333	0	0	0	0	0	0	0	0	0	0	0	0	0	0	0	0	123.745	R	0	0	0	0	0	0	0	0	0	0	52.875	5.625	22.5	3
1D45C170B3	93	Male	38.8681	0	4.17569	1	10	30	50	0	30.4	3.4	0	0	14.3333	2.33333	8	2	4	0	0	0	0	0	0	0	0	0	0	0	5.5	1.5	52.7253	R	0	0	0	0	0	0	0	0	0	0	0	0	45.5	3.5
9F5DFE83A6	70	Male	17.3833	5.63264	5.63264	2	9	17	18	0	12	2	2.25	1.28571	18.3333	2.33333	0	0	0	0	0	0	17.8571	3.57143	0	0	0	0	0	0	0	0	8.5213	R	0	0	0	0	0	0	0	0	0	0	0	0	0	0
C747827332	81	Female	23.6604	7.92014	7.92014	0	39	23	39	0	21.4	4.4	0	0	19.25	3.25	2	1	0	0	0	0	0	0	0	0	0	0	0	0	13.5	4.5	35.7444	R	0	0	0.166667	0	0	0	0	0	0	0	0	0	5	2
4E45DCDA5A	72	Male	38.391	20.1625	37.3792	0	9	21	24	0	19.4	2.4	14.4643	1.60714	30.6667	2.66667	0	0	0	0	0	0	0	0	0	0	0	0	0	0	0	0	2.86294	R	0	0	0.222222	0	0	0	0	0	0	0	0	0	0	0
326A590D14	74	Female	0	0	0	0	2	2	2	0	0	0	0	0	3.33333	1.33333	0	0	0	0	0	0	0	0	0	0	0	0	0	0	0	0	3.85376	R	0	0	0	0	0	0	0	0	0	0	0	0	0	0
C20585BD4C	84	Male	7.93403	0	0	0	20	13	20	0	18	2	0	0	17	2	0	0	2	0	0	0	0	0	0	0	0	0	0	0	0	0	0	S	0	0	0	0	0	0	0	0	0	0	0	0	0	0
484DFE2197	71	Male	14.6514	5.59792	5.59792	1	8	15	16	0	12.4	2.4	0	0	12.6667	1.66667	0	0	0	0	0	0	12.5	5.35714	0	0	0	0	0	0	0	0	3.61039	R	0	0	0.166667	0	0	0	0	0	0	0	0	0	0	0
07934FFAD6	70	Male	28.7153	10.5542	10.5542	0	16	22	26	0	37.5	6	0	0	16	2.66667	7	2	0	0	0	0	26.7857	7.14286	0	0	0	0	0	0	0	0	105.278	R	0	0	0	0	0	0	0	0	0	0	0	0	0	0
F8FC4B3C98	71	Male	0	0	0	0	2	5	7	0	0	0	0	0	7	2	0	0	0	0	0	0	0	0	0	0	0	0	0	0	0	0	4.73814	R	0	0	0	0	0	0	0	0	0	0	0	0	0	0
45A3D86092	66	Female	0	0	0	0	7	4	7	0	0	0	5.46429	1.60714	0	0	0	0	0	0	0	0	0	0	0	0	0	0	0	0	0	0	8.42924	R	0	0	0	0	0	0	0	0	0	0	0	0	0	0
2118AA406F	74	Female	7.81667	0	0	0	9	17	19	0	0	0	4.17857	1.28571	2.16667	0.666667	0	0	0	0	0	0	0	0	0	0	0	0	0	0	0	0	0	S	0	0	0	0	0	0	0	0	0	0	0	0	15.5	2.5
69F4EC7205	77	Male	10.5278	2.74236	4.47569	1	11	9	11	0	10.5	3	0	0	4.16667	0.666667	0	0	0	0	0	0	0	0	0	0	0	0	0	0	9.5	1.5	0	S	0	0	0	0	0	2	1	0	0	0	4	2	0	0
D5A023B023	66	Female	3.31736	0	0	1	4	4	4	0	0	0	0	0	4	1	0	0	0	0	0	0	8.92857	3.57143	0	0	0	0	0	0	0	0	0	S	0	0	0	0	0	0	0	0	0	0	0	0	0	0
E62E3F856E	69	Female	0	0	0	1	24	13	24	0	0	0	13.8214	1.28571	0	0	0	0	0	0	0	0	0	0	0	0	0	0	0	0	0	0	0	S	0	0	0	0	0	0	0	0	0	0	0	0	0	0
A11414DEBC	73	Female	0	0	0	1	12	9	12	0	0	0	11.8929	1.28571	0	0	0	0	0	0	0	0	0	0	0	0	0	0	0	0	0	0	8.18497	R	0	0	0	0	0	0	0	0	0	0	0	0	0	0
F532B55009	89	Female	13.0924	0	2.95833	0	13	14	14	0	0	0	0	0	5	2	8	2	0	0	0	0	0	0	0	0	0	0	0	0	11	1	10.8615	R	0	0	0.444444	0	0	0	0	0	0	0	0	0	10	2
AD0A4B5F91	88	Male	0	0	0	0	0	0	5	0	0	0	11.25	2.57143	2.75	0.75	0	0	0	0	0	0	0	0	0	0	0	0	0	0	0	0	0	S	0	0	0	0	0	0	0	0	0	0	0	0	0	0
80888BFB59	87	Female	21.7535	0	0	0	161	152	183	0	16	5	0	0	27.3333	3.16667	0	0	1	0	0	0	0	0	0	0	0	0	0	0	11.5	2.5	413.808	S	0	0	0.166667	0	0	0	0	0	0	0	19.6667	5.41667	0	0
5DA4AB02AC	65	Male	19.1083	0	0	1	8	32	32	2.4	0	0	9	1.28571	8.83333	1.5	0	0	1.5	0	0	0	0	0	0	0	0	0	0	0	0	0	18.9905	R	0	0	0	0	0	0	0	0	0	0	5	2	10.75	1.75
5F368CFDE9	76	Male	72.0868	4.99514	12.9694	1	139	145	51	3	31.4	8.4	0	0	30.1667	2.66667	0	0	2	0	0	0	12.5	3.57143	0	0	0	0	0	0	0	0	19.6996	R	0	0	1.16667	0	0	0	0	0	0	0	36.4167	5.66667	39.5	2
D1489F07DF	73	Male	19.8271	0	0	2	22	24	0	0	0	0	0	0	3.91667	1.08333	0	0	0	0	0	0	0	0	0	0	0	0	0	0	5.5	1.5	4.64208	R	0	0	0.444444	0	0	0	0	0	0	0	24.5833	2.08333	5	2
6399794ADF	75	Male	33.9486	15.4757	15.4757	0	70	69	69	0.8	22	2	6.10714	2.25	36	3.25	8	2	0	0	0	0	0	0	0	0	0	0	0	0	3.5	1.5	43.6681	R	0	0	0.333333	0	0	0	0	0	0	0	0	0	45	3
726BE22B83	72	Female	61.0319	8.93819	15.9889	1	82	49	72	0	39	7	42.1071	6.42857	6	1	3	2	0	0	0	0	0	0	0	0	0	0	0	0	45.5	6.5	19.8421	R	0	0	0	0	0	0	0	0	0	0	0	0	86.5	13
2D46AC13A5	67	Female	0	0	0	4	112	19	77	0.4	0	0	0	0	0	0	2	1	0	0	0	0	0	0	0	0	0	0	0	0	0	0	157.891	R	0	0	0	0	0	6.5	1.5	0	0	0	0	0	17.75	3.25
69934C29F7	70	Male	18.8396	0	0	0	28	0	28	0	0	0	14.7857	2.25	7.75	1	0	0	0	0	0	0	0	0	0	0	0	0	0	0	12.5	2.5	2.7786	R	0	0	0	0	0	0	0	0	0	0	0	0	4	2.5
3EE62F2308	74	Female	7.36736	5.37222	7.34097	0	8	8	2	0	9	1	0	0	5.58333	1.83333	0	0	0	0	0	0	0	0	0	0	0	0	0	0	0	0	3.76786	R	0	0	0	0	0	0	0	0	0	0	3	1.5	0	0
60465ED8C1	76	Male	0	0	0	0	0	0	0	0	0	0	0	0	0	0	0	0	0	0	0	0	0	0	0	0	0	0	0	0	0	0	0	S	0	0	0	0	0	0	0	0	0	0	0	0	0	0
130DF780A3	80	Female	0	0	0	1	9	16	25	0	0	0	0	0	7.33333	1.33333	0	0	0	0	0	0	0	0	0	0	0	0	0	0	0	0	12.9366	R	0	0	0	0	0	0	0	0	0	0	25.5	3	0	0
715AB89EAB	93	Male	36.9604	0	22.7785	1	32	23	32	0	23	4	10.9286	1.28571	0	0	13	4	0	0	0	0	0	0	0	0	0	0	0	0	0	0	6.90286	R	0	0	0	0	0	0	0	0	0	0	22.5	2.5	7.5	1.5
0EA6409E7B	93	Male	39.7868	5.99861	19.1403	0	71	71	0	0.4	69.4	9.4	7.07143	2.25	5.83333	1.83333	0	0	0	0	0	0	0	0	0	0	0	0	0	0	14.5	2.5	41.9223	S	0	0	0.0555556	0	0	0	0	0	0	0	31.6667	2.91667	26.25	5.25
D5050FDF1A	56	Female	19.5451	0	0	0	20	20	20	0	0	0	0	0	21.3333	1.33333	0	0	0	0	0	0	0	0	0	0	0	0	0	0	23.5	3.5	13.693	R	0	0	0	0	0	0	0	0	0	0	0	0	0	0
F78CABEDEA	33	Male	13.7417	1.87639	1.87639	0	9	13	17	0	8	4	0	0	21.3333	3.33333	0	0	0	0	0	0	0	0	0	0	0	0	0	0	7	1	9.50372	R	0	0	0	0	0	0	0	0	0	0	0	0	0	0
06EAC2225D	74	Male	0	0	0	0	1	1	1	0	0	0	0	0	2.33333	1.66667	0	0	0	0	0	0	0	0	0	0	0	0	0	0	0	0	0	S	0	0	0	0	0	0	0	0	0	0	0	0	0	0
3DAAE03091	72	Female	8.75903	0	0	0	0	10	10	0	0	0	0	0	5.16667	0.666667	0	0	0	0	0	0	23.2143	5.35714	0	0	0	0	0	0	0	0	10.5984	R	0	0	0	0	0	0	0	0	0	0	0	0	3.5	2
9694607ADA	65	Male	35.6465	5	5	2	29	45	29	2.4	0	0	0	0	16.1667	2.83333	14	4	2	0	0	0	0	0	0	0	0	0	0	0	2.5	1.5	36.8051	S	0	0	0.333333	0	0	0	0	0	0	12	0	0	20	2
CC8F3BEE11	74	Male	3.68194	0	0	0	4	13	9	0	0	0	0	0	17.3333	3.33333	0	0	0	0	0	0	0	0	0	0	0	0	0	0	0	0	3.47954	R	0	0	0.222222	0	0	0	0	0	0	0	0	0	0	0
EECC975FCC	64	Male	15.9486	4.15208	6.02292	3	9	36	36	3.6	0	0	0	0	43.6667	4.66667	0	0	0	0	0	0	0	0	0	0	0	0	0	0	0	0	8.58868	R	0	0	0	0	0	0	0	0	0	0	11	3	5	2
B5A9071662	56	Female	12.9	0	0	1	0	14	0	0	0	0	0	0	1.66667	0.666667	0	0	4	0	0	0	14.2857	3.57143	0	0	0	0	0	0	0	0	14.9226	R	0	0	0.166667	0	0	0	0	0	0	0	0	0	12.5	2
361A63084D	70	Female	0	4.90417	4.90417	0	3	3	3	0	0	0	0	0	2.16667	0.666667	0	0	0	3.5	0	0	0	0	0	0	0	0	0	0	0	0	3.63721	R	0	0	0.222222	0	0	0	0	0	0	0	0	0	0	0
EE3CC75E7B	87	Male	31.8222	0	23.0132	1	42	34	42	0	10.4	3.4	1.60714	0.964286	9.66667	2.16667	14	4	0	0	0	0	7.14286	3.57143	0	0	0	0	0	0	13	3	7.38762	R	0	0	0.333333	0	0	0	0	0	0	0	30.3333	4.33333	22.25	5.75
A4666717D1	72	Male	11.8417	1.95625	1.95625	0	3	4	0	0	17	4	4.17857	1.28571	5.5	1.16667	0	0	0	0	0	0	0	0	0	0	0	0	0	0	4	2	18.6882	R	0	0	0	0	0	0	0	0	0	0	0	0	0	0
D4C5E44DAA	85	Male	55.7062	12.6229	25.4639	0	61	77	93	0	26	6	22.5071	3.22143	28.3333	2.83333	0	0	0	0	0	0	0	0	0	0	0	0	0	0	0	0	55.3595	R	0	0	0.75	0	0	0	0	0	0	0	3.75	0.75	12	1.5
CEBF83BD0E	80	Male	10.5743	7.56667	7.56667	1	8	11	11	0	12	2	0	0	6.16667	0.833333	0	0	0	0	0	0	0	0	0	0	0	0	0	0	0	0	12.6976	R	0	0	0	0	0	0	0	0	0	0	0	0	7	2.5
485D36BB89	84	Female	39.9611	26.5618	26.5618	0	29	38	46	0	24	2	2.73214	0.803571	17.6667	1.16667	0	0	0	0	0	0	0	0	0	0	0	0	0	0	0	0	50.8463	S	0	0	0.555556	0	0	0	0	0	0	0	0	0	0	0
52D6117FB3	84	Male	0	0	0	1	4	5	5	0	0	0	0	0	0	0	0	0	0	0	0	0	0	0	0	0	0	0	0	0	0	0	0	S	0	0	0	0	0	3.5	1.5	0	0	0	0	0	6.5	2
A057533DB1	65	Female	90.4736	32.7833	60.2576	0	12	72	72	0	36	3	0	0	50.6667	4.66667	0	0	0	0	0	0	5.35714	3.57143	0	0	0	0	0	0	0	0	2.69654	R	0	0	1.42424	0	0	0	0	0	0	0	0	0	65	2
0F27FB0A12	60	Male	0	0	0	3	5	2	11	0	0	0	0	0	0	0	0	0	0	0	0	0	0	0	0	0	0	0	0	0	0	0	0	S	0	0	0	0	0	2.5	1.5	0	0	0	9.75	2.25	0	0
27D6FA4837	65	Male	9.90486	0	0	0	11	11	11	0	0	0	0	0	1.75	1	0	0	0	0	0	0	0	0	0	0	0	0	0	0	13.5	2.5	3.83243	R	0	0	0	0	0	0	0	0	0	0	0	0	17	2
E87D926573	68	Male	17.2368	0	0	4	11	19	30	0	0	0	5.14286	1.28571	11.5	1	0	0	0	0	0	0	25	3.57143	0	0	0	0	0	0	7	1	0	S	0	0	0	0	0	0	0	0	0	0	0	0	3.5	2
8C9C746842	76	Female	9.06042	4.85556	4.85556	0	6	7	7	0	0	0	0	0	10.3333	2.33333	0	0	3	0	0	0	0	0	0	0	0	0	0	0	4	1	3.87139	R	0	0	0.611111	0	0	0	0	0	0	0	0	0	0	0
8EAD52CDA2	74	Male	4.77778	2.95069	2.95069	1	6	11	14	1	0	0	0	0	7.75	2.25	0	0	0	0	0	0	0	0	0	0	0	0	0	0	6.5	1.5	8.5289	R	0	0	0	0	0	0	0	0	0	0	0	0	14.5	2.5
C755CA9433	76	Male	49.0979	0	0	5	154	127	160	0	0	0	17.6786	2.89286	21.8333	1.5	18	2	1	0	0	0	0	0	0	0	0	0	0	0	0	0	8.22924	R	0	0	1	0	0	0	0	0	0	0	22.75	1.75	0	0
A11E5F3FD4	85	Female	0	0	0	1	8	8	8	0	0	0	7.07143	3.21429	0	0	0	0	0	0	0	0	0	0	0	0	0	0	0	0	0	0	0	S	0	0	0	0	0	0	0	0	0	0	0	0	0	0
2B6340BA79	82	Male	25.9861	0	0	1	38	33	42	1.2	19	5	0	0	12.8333	3.16667	0	0	3	0	0	0	0	0	0	0	0	0	0	0	3.5	1.5	0	S	0	0	0.361111	0	0	0	0	0	0	0	13.25	3	0	0
44AE6F912D	78	Male	55.0653	2.01111	13.0243	2	21	49	85	0	32	5	30.8571	3.85714	27.25	2.41667	0	0	0	0	0	0	0	0	0	0	0	0	0	0	11.5	2.5	21.1635	R	0	0	2.51515	0	0	0	0	0	0	0	0	0	12.5	2
C14921B86F	58	Male	37.7007	0	9.03333	0	10	36	36	1.8	0	0	0	0	9.33333	4.33333	0	0	3	0	0	0	0	0	0	0	0	0	0	0	0	0	8.74919	R	0	0	0.444444	0	0	0	0	0	0	0	1.25	0.75	0	0
BDF30369DA	56	Female	15.8993	0	0	0	20	30	0	0	0	0	7.07143	1.28571	0	0	0	0	2	0	0	0	0	0	0	0	0	0	0	0	14.5	1.5	14.6327	R	0	0	0	0	0	0	0	0	0	0	0	0	29	2
E9AE3890E3	59	Male	16.7569	0	0	0	17	7	0	0	0	0	0	0	4.75	1	0	0	2	0	0	0	0	0	0	0	0	0	0	0	11	3	15.796	R	0	0	0	0	0	0	0	0	0	0	0	0	19.5	1.5
E38A45D44D	80	Male	0	0	0	0	15	11	8	0	0	0	15.1071	3.53571	0	0	0	0	0	0	0	0	0	0	0	0	0	0	0	0	0	0	20.2465	R	0	0	0	0	0	0	0	0	0	0	0	0	0	0
B3EEFFA3CB	80	Male	0	0	0	0	1	10	10	0	0	0	2.25	1.28571	4.75	1.75	0	0	0	0	0	0	3.57143	3.57143	0	0	0	0	0	0	0	0	9.11088	R	0	0	0.166667	0	0	0	0	0	0	0	0	0	9.5	2
D7C44A355F	67	Male	53.7257	19.0111	30.0431	0	48	57	57	3.6	66.5	8.5	0	0	26.6667	2.66667	13	4	0	0	0	0	16.0714	3.57143	0	0	0	0	0	0	0	0	15.9445	R	0	0	0.888889	0	0	0	0	0	0	0	4	1	40.5	4.5
FD30F719AD	80	Male	19.9889	8.68611	19.7583	0	26	14	14	0	22.025	6.525	10.9688	3.25446	5.25	0.75	4	1	0	0	0	0	0	0	0	0	0	0	0	0	17.5	3.5	22.6236	R	0	0	0.388889	0	0	0	0	0	0	0	6.75	2.25	11	2
634620263E	83	Male	2.01319	0	1.23958	0	1	4	4	0	5.11429	2.82857	6.75	1.60714	0	0	0	0	0	0	0	0	0	0	0	0	0	0	0	0	0	0	0	S	0	0	0	0	0	0	0	0	0	0	0	0	0	0
37DD93604A	75	Male	4.89861	0	0	1	1	10	17	0	8.9	3.9	0	0	7.33333	1.33333	0	0	0	0	0	0	0	0	0	0	0	0	0	0	0	0	17.7751	R	0	0	0	0	0	8.5	1.5	0	0	0	0	0	13	7
6EF98E5EEF	68	Female	0	0	0	1	45	0	46	0	0	0	0	0	0	0	0	0	0	0	0	0	0	0	0	0	0	0	0	0	0	0	0	S	0	0	0	0	0	0	0	0	0	0	0	0	0	0
38EC8CDA14	80	Male	41.8403	0	39.7368	0	14	11	42	0	53	6	0	0	9.83333	2.16667	0	0	0	0	0	0	0	0	0	0	0	0	0	0	0	0	24.8595	R	0	0	0.555556	0	0	0	0	0	0	0	40	1.25	0	0
C531FF28D3	77	Male	2.725	1.93542	3.93403	0	7	5	5	0	8.9	3.9	0.321429	0.321429	2.83333	0.833333	0	0	3	0	0	0	0	0	0	0	0	0	0	0	0	0	6.95578	R	0	0	0.333333	0	0	0	0	0	0	0	4.16667	1.66667	0	0
9EDB49642F	72	Male	39.8097	0	33.9639	0	23	21	23	0	36	4	0	0	0	0	0	0	3	0	0	0	0	0	0	0	0	0	0	0	5	1	0	S	0	0	0.166667	0	0	0	0	0	0	0	6.41667	2.66667	27.5	3.5
8437C1DCB6	78	Male	95.7215	0	19.5028	0	175	185	189	0	52	6.5	0	0	5.33333	1.33333	6	2	0	0	0	0	0	0	0	0	0	0	0	0	75.5	6.5	0	S	0	0	0	0	0	0	0	0	0	0	121	7	73.5	6
CC62C0B850	79	Male	73.1722	15.2576	34.1125	0	96	161	161	4.2	53.1381	9.87619	13.1786	1.60714	24.75	1.75	0	0	1	0	0	0	33.9286	7.14286	0	0	0	0	0	0	2.5	1.5	145.669	S	0	0	1.27778	0	0	0	0	0	0	0	85.5833	7.83333	6.5	3.5
D2057EF22D	70	Male	7.0125	0	0	2	41	6	51	0	0	0	0	0	5.16667	1.16667	9	2	0	0	0	0	0	0	0	0	0	0	0	0	0	0	0	S	0	0	0	0	0	0	0	0	0	0	4	2	2	2
8DD202EAB5	66	Female	32.9514	12	16.6299	2	17	38	38	0	0	0	8.35714	2.57143	31.5	5	0	0	0	0	0	0	0	0	0	0	0	0	0	0	7.5	1.5	17.7325	R	0	0	2.01717	0	0	0	0	0	0	0	12.0833	2.08333	0	0
2884E6B7D2	85	Female	2.97708	0	0	0	27	27	27	0	0	0	0	0	9	1.33333	0	0	0	0	0	0	0	0	0	0	0	0	0	0	0	0	11.7909	S	0	0	0	0	0	0	0	0	0	0	0.5	0.5	0	0
6C96866191	77	Female	33.7847	0	2.11875	0	21	249	280	0	4.4	2.4	18.9643	1.92857	23.5833	4.08333	7	2	0	0	0	0	0	0	0	0	0	0	0	0	17	2	22.8499	R	0	0	0.333333	0	0	0	0	0	0	11	6.75	2.75	7	3
354F0EB207	63	Male	92.0514	15.9417	39.9604	0	90	286	286	1.8	45.4	6.4	21.8571	2.57143	26.3333	1.83333	7	2	0	0	0	0	21.4286	3.57143	65.25	1.75	0	0	0	0	0	0	56.6184	S	0	0	2.57828	0	0	0	0	0	0	6.66667	16.5	1.5	0	0
1A9003D299	79	Female	13.9681	0	0	0	19	19	90	0	9.4	2.4	12.8571	2.25	8.5	1.75	0	0	0	0	0	0	0	0	0	0	0	0	0	0	0	0	30.8848	R	0	0	0	0	0	0	0	0	0	0	0.666667	0.333333	0	0
729947774F	73	Female	8.05694	0	7.22639	0	24	17	38	0	22	4	6.10714	1.28571	0	0	0	0	1.5	0	0	0	0	0	0	0	0	0	0	0	0	0	0	S	0	0	0.222222	0	0	0	0	0	0	0	0	0	0	0
2B11FC3A8D	61	Female	9.26875	0	0	0	26	10	4	0	0.5	0.5	11.25	2.57143	0	0	13	3	0	0	0	0	0	0	0	0	0	0	0	0	2.5	1.5	0	S	0	0	0	0	0	0	0	0	0	0	2.5	1.5	0	0
71377D5305	78	Male	0	0	0	1	25	3	12	0	0	0	0	0	0	0	0	0	0	0	0	0	0	0	0	0	0	0	0	0	0	0	0	S	0	0	0	0	0	0	0	0	0	0	0	0	16	4
4779FD39E0	50	Female	5.49236	0	0	2	19	8	21	0	0	0	0	0	5.16667	0.666667	0	0	0	0	0	0	0	0	0	0	0	0	0	0	0	0	11.7495	R	0	0	0	0	0	0	0	0	0	0	0	0	0	0
467EF85F3C	49	Male	7.83194	0	0	1	14	15	15	0	0	0	10.2857	1.60714	0	0	0	0	0	0	0	0	0	0	0	0	0	0	0	0	9	1	0	S	0	0	0	0	0	6.5	1.5	0	0	0	0	0	0	0
97A0653BA1	34	Male	0	0	0	1	23	17	23	0	0	0	8.03571	1.28571	0	0	0	0	0	0	0	0	0	0	0	0	0	0	0	0	0	0	18.3633	R	0	0	0	0	0	0	0	0	0	0	39	3	0	0
E5AAC66E50	39	Male	4.85139	0	0	1	15	12	15	0	0	0	1.28571	1.28571	4.16667	0.666667	0	0	0	0	0	0	0	0	0	0	0	0	0	0	6.5	1.5	10.2449	R	0	0	0	0	0	0	0	0	0	0	13.5	3	0	0
A23C71415F	54	Male	16.775	17.091	17.091	2	20	5	21	0	20	4	0	0	21.3333	1.33333	0	0	0	0	0	0	0	0	0	0	0	0	0	0	0	0	0	S	0	0	0.166667	0	0	0	0	0	0	0	0	0	0	0
A71BEBFDD9	58	Female	0	0	0	0	20	8	20	0	0	0	0	0	3	1	0	0	0	0	0	0	0	0	0	0	0	0	0	0	0	0	3.73816	R	0	0	0	0	0	0	0	0	0	0	0	0	17	2
0C52CACEF5	86	Male	0	0	0	0	4	1	11	0	0	0	1.92857	0.964286	0	0	0	0	0	0	0	0	0	0	0	0	0	0	0	0	0	0	0	S	0	0	0	0	0	0	0	0	0	0	0	0	0	0
46BD473B57	56	Female	2.09792	0	0	0	54	115	134	0	0	0	62.0357	6.42857	6.16667	0.666667	0	0	4	0	0	0	0	0	0	0	0	0	0	0	0	0	42.5375	R	0	0	0.0833333	0	0	0	0	0	0	0	1.75	0.75	0	0
33F336620C	54	Male	11.6819	0	14.8681	3	64	15	100	0	50	8	11.25	1.60714	16.8333	3.33333	0	0	2	0	0	0	23.2143	3.57143	0	0	0	0	0	0	0	0	49.502	R	0	0	1.73737	0	0	0	0	0	0	8	0	0	0	0
ACE8A652A3	44	Male	4.08819	0	0	0	31	9	35	0	10	4	0	0	4.66667	0.666667	0	0	0	0	0	0	0	0	0	0	0	0	0	0	3.5	1.5	0	S	0	0	0	0	0	0	0	0	0	0	0	0	0	0
5BA72FDDB0	33	Male	6.95139	0	10.3674	0	12	12	12	0	15	8	3.21429	1.28571	3.16667	0.666667	0	0	0	0	0	0	16.0714	7.14286	0	0	0	0	0	0	0	0	0	S	0	0	0.222222	0	0	0	0	0	0	0	0	0	9	1.5
A90A991F15	79	Male	8.88194	4.74792	4.74792	0	11	16	16	0	25.5	5.5	0	0	17	1	3	1	0	0	0	0	0	0	0	0	0	0	0	0	0	0	0	S	0	0	0.222222	0	0	0	0	0	0	0	0	0	0	0
98C574A745	75	Male	2.90347	0	0	0	16	3	9	0.15	0	0	0	0	3.5	0.5	0	0	0	0	0	0	0	0	0	0	0	0	0	0	4.5	1.5	12.7261	R	0	0	0	0	0	0	0	0	0	0	0	0	0	0
DDD6DCDCD0	70	Male	16.7958	0	19.1667	2	16	16	0	2.4	11.8	3.1	8.67857	0.964286	0	0	2	2	0	0	0	0	0	0	0	0	0	0	0	0	0	0	3.47329	R	0	0	0.5	0	0	0	0	0	0	0	7.91667	2.91667	0	0
43A493A5F9	75	Male	4.99236	0	10.8396	0	0	21	21	0	7.6	5.5	0	0	1	1	14	6	0	0	0	0	0	0	0	0	0	0	0	0	1	1	27.6605	R	0	0	0.979798	0	0	0	0	0	0	0	6	1	25	5
4DB7F79A96	85	Male	8.88681	2.02986	11.5799	1	11	0	11	0	12	5	4.82143	0.964286	2.16667	1.16667	0	0	0	0	0	0	0	0	0	0	0	0	0	0	5.5	1.5	9.92361	R	0	0	0.277778	0	0	0	0	0	0	0	0	0	9	1.5
E39C13B7E8	59	Male	10.1222	0	0	1	11	10	29	0	0	0	0	0	11.3333	1.33333	0	0	0	0	0	0	0	0	0	0	0	0	0	0	16	3	17.6186	R	0	0	0	0	0	0	0	0	0	0	0	0	0.5	0.5
D224B395D6	77	Male	27.4271	8.04653	12.0417	1	27	22	27	7.2	10.4	2.4	0	0	28.5833	7.58333	0	0	0	1	0	0	8.03571	5.35714	0	0	0	0	0	0	6	2	13.8208	R	0	0	0.361111	0	0	0	0	0	0	0	5.41667	1.66667	0	0
E44FDEEB0B	36	Male	5.82431	0	0	0	7	6	0	0	0	0	0	0	8	1.5	7	1	0	0	0	0	0	0	0	0	0	0	0	0	0	0	10.5992	R	0	0	0	0	0	0	0	0	0	0	0	0	0	0
E0F80BA315	74	Female	0	0	0	2	9	2	4	0	0	0	0	0	0	0	0	0	0	0	0	0	0	0	0	0	0	0	0	0	0	0	0	S	0	0	0	0	0	2.5	1.5	0	0	0	0	0	5.5	2.5
6BC9749C63	34	Female	0	0	0	2	9	1	10	0	0	0	0	0	0	0	0	0	0	0	0	0	0	0	0	0	0	0	0	0	0	0	0	S	0	0	0	0	0	0	0	0	0	0	0	0	2.5	1.5
60B97AD83E	90	Male	83.7021	41.6778	62.5736	1	104	105	107	0	117.5	18	3.21429	1.28571	23.1667	3.33333	11	2	0	0	0	0	51.7857	3.57143	0	0	0	0	0	0	7	2	58.7374	S	0	0	0.583333	0	0	0	0	0	0	0	28.3333	4.58333	11.5	3
AEFBBC4C39	32	Male	15.8875	0	3.05764	4	18	15	20	0	15.4	4.4	17.3571	4.5	0	0	7	1	4	0	0	0	0	0	0	0	0	0	0	0	0	0	8.95742	S	0	0	0	0	0	0	0	0	0	0	0	0	0	0
47D115BF5A	30	Male	238.722	82.5715	110.868	5	525	781	502	21.9333	320.1	54.8	55.3661	8.67857	171	24.5833	0	0	10	0	0	0	171.429	21.4286	8	1	0	0	0	0	19.5	1.5	400.88	S	0	6	2.77778	0	0	0	0	26.4	2.4	0	97.25	12.25	48.25	8.25
6A71610EB6	38	Male	13.016	0	0	0	24	28	28	0	11	3	21.2143	4.5	0	0	18	5	0	0	0	0	0	0	0	0	0	0	0	0	0	0	0	S	0	0	0	0	0	0	0	0	0	0	0	0	0	0
4F3BAB8837	88	Male	65.7264	20.8111	20.8111	2	117	112	114	0	14	3	0	0	46.9167	4.75	0	0	2	0	0	0	0	0	0	0	0	0	0	0	0	0	306.875	S	0	0	0.472222	0	0	0	0	0	0	0	38.6667	5.66667	23	3.5
61CDCB6F62	22	Male	11.6313	0	0	4	20	0	26	0	0	0	0	0	5.75	1.25	0	0	0	0	0	0	0	0	0	0	0	0	0	0	7.5	1.5	8.94037	R	0	0	0	0	0	0	0	0	0	0	10.25	4.25	0	0
8A708016E7	50	Male	19.0785	0	0	1	22	19	29	0	3	1	22.8214	2.25	0	0	16	5	0	0	0	0	0	0	0	0	0	0	0	0	1	1	26.5242	R	0	0	0	0	0	0	0	0	0	0	0	0	0	0
743813C256	64	Male	13.466	0	9.20903	3	113	46	114	0	0	0	32.4643	3.53571	7.16667	0.666667	11	2	12	0	0	0	0	0	0	0	0	0	0	0	0	0	43.5624	S	0	0	0	0	0	0	0	0	0	0	2.5	2.5	0	0
79BE0737E0	50	Male	21.4917	0	1.83958	0	63	61	74	4.8	5.25	2.75	70.3929	6.10714	0	0	0	0	0	0	0	0	8.92857	3.57143	0	0	0	0	0	0	0	0	14.7428	R	0	0	0	0	0	0	0	0	0	0	42.75	3.75	0	0
D1F9A20F0F	81	Male	97.7139	36.7583	65.2667	0	119	113	119	13.2	134.4	27.9	94.8214	20.25	82	17.8333	0	0	8.5	0	0	0	0	0	0	0	0	0	0	0	39	5	13.2817	R	0	0	0.111111	0	0	0	0	0	0	0	2.25	0.75	6	1.5
61FEFA63E5	73	Female	0	0	0	1	0	0	0	0	0	0	0	0	1.5	1.5	0	0	0	0	0	0	3.57143	3.57143	0	0	0	0	0	0	0	0	0	S	0	0	0	0	0	0	0	0	0	0	0	0	0	0
7A2C9CCC96	53	Male	39.2667	12.9986	23.8229	2	46	48	49	2.4	40.5	8.5	11.25	2.25	26	2	24	4	0	0	0	0	0	0	0	0	0	0	0	0	4.5	1.5	24.4099	S	0	0	0	0	0	6.41667	2.41667	0	0	0	21.25	5.75	14	2
6537D7BC89	82	Male	8.8	0	0	0	35	15	38	0	0	0	13.8214	1.28571	7.5	1.75	5	2	0	0	0	0	0	0	0	0	0	0	0	0	8.5	1.5	16.7259	S	0	0	0	0	0	0	0	0	0	0	5.75	0.75	0	0
16CF6F6E46	27	Male	3.72639	0	0	0	43	8	23	0	0	0	6.75	1.60714	3.83333	1.33333	6	2	0	0	0	0	0	0	0	0	0	0	0	0	0	0	6.78234	R	0	0	0	0	0	0	0	0	0	0	0	0	0	0
6977C19EAA	67	Male	9.32083	0	2.02847	0	14	14	14	0	3.5	1.5	0	0	5.75	1.25	0	0	3	0	0	0	0	0	0	0	0	0	0	0	8	3	16.3737	R	0	0	0	0	0	0	0	0	0	0	4	2	11	2
27B1DE3631	90	Male	104.085	5.66667	32.1833	4	149	179	194	0	72.8	17.3	9	1.28571	23	5	0	0	0	0	0	0	33.9286	3.57143	0	0	0	0	0	0	19.5	5.5	3.95988	R	0	0	1.82778	0	0	0	0	4.4	1.2	0	39.9167	7.91667	75	11.5
99AE915962	89	Male	12.8264	5.97917	11.4389	0	13	13	13	0	9.8	3.8	9.96429	2.57143	9	2	9	2	3	0	0	0	0	0	0	0	0	0	0	0	7.5	1.5	4.58372	R	0	0	0	0	0	0	0	0	0	0	0	0	0	0
37FF5E8734	54	Female	0	0	0	3	26	7	27	0	0	0	6.75	1.60714	0	0	0	0	0	0	0	0	0	0	0	0	0	0	0	0	0	0	7.6461	R	0	0	0	0	0	0	0	0	0	0	6	2	0	0
9E88CF3D4C	50	Male	13.2667	0	0	1	12	20	21	0	0	0	7.07143	2.25	5.33333	2.33333	0	0	1	0	0	0	0	0	0	0	0	0	0	0	14	3	23.6634	R	0	0	0.166667	0	0	4	3	0	0	0	0	0	0	0
80EE1F457A	46	Male	0	0	0	1	18	7	18	0	0	0	11.8929	1.60714	0	0	0	0	0	0	0	0	0	0	0	0	0	0	0	0	0	0	0	S	0	0	0	0	0	0	0	0	0	0	4	3	0	0
0E7F59B806	66	Male	0	0	0	1	5	5	5	0	0	0	7.39286	2.25	0	0	0	0	0	0	0	0	0	0	0	0	0	0	0	0	0	0	0	S	0	0	0	0	0	0	0	0	0	0	0	0	0	0
E98DB86C37	56	Male	11.9958	0	0	2	21	25	25	0	0	0	3.21429	1.28571	7.83333	1.83333	0	0	0	0	0	0	0	0	0	0	0	0	0	0	16.5	2.5	0	S	0	0	0	0	0	10.5	1.5	0	0	0	0	0	0	0
7961CC482D	74	Female	30.7715	3.85208	3.85208	1	203	12	219	0	24	2	0	0	12.6667	0.666667	0	0	0	0	0	0	1.78571	1.78571	0	0	0	0	0	0	0	0	0	S	0	0	0.166667	0	0	0	0	0	0	0	0	0	45.5	6.5
3824C531B6	50	Male	12.7417	0	0	0	24	24	14	2.4	8.9	3.9	18.3214	2.89286	26.6667	2.66667	0	0	5	0	0	0	0	0	0	0	0	0	0	0	0	0	10.7659	R	0	0	0.222222	0	0	0	0	0	0	0	0	0	0	0
0A9AAA12EE	25	Male	6.67083	0	0	6	36	9	29	0	0	0	0	0	10.25	1.25	0	0	0	0	0	0	0	0	0	0	0	0	0	0	0	0	8.2264	R	0	0	0	0	0	0	0	0	0	0	0	0	0	0
72C934407E	77	Male	18.1076	0	0	6	113	48	51	0	0	0	46.9286	7.39286	11	1	0	0	0	0	0	0	0	0	0	0	0	0	0	0	23	8	0	S	0	0	0.111111	0	0	0	0	0	0	0	2	2	0	0
5F0C737BAA	87	Male	78.709	15.1465	32.1285	0	162	112	166	14.4	84.2	19.2	93.2143	11.8929	40.3333	8.33333	0	0	8	0	0	0	64.2857	8.92857	0	0	0	0	0	0	0	0	3.48676	R	0	0	0.722222	16	1.33333	0	0	0	0	0	0	0	11.5	4
5410231F65	45	Male	8.15069	0	0	3	36	34	36	0	0	0	31.5	3.21429	3.66667	0.666667	0	0	0	0	0	0	0	0	0	0	0	0	0	0	13	3	0	S	0	0	0	0	0	0	0	0	0	0	6.25	2.75	0	0
7A906A7993	41	Male	16.7889	1.60417	7.46181	1	22	0	20	0	0	0	0	0	10.6667	2.66667	4	2	3	0	0	0	0	0	0	0	0	0	0	0	0	0	0	S	0	0.75	0.583333	0	0	0	0	0	0	0	0	0	0	0
CC7F0A414A	73	Female	0	0	0	0	20	0	26	0	0	0	15.75	1.60714	5.33333	1.33333	0	0	0	0	0	0	0	0	0	0	0	0	0	0	0	0	14.9555	R	0	0	0	0	0	0	0	0	0	0	0	0	0	0
36979D4036	51	Female	0	2.75139	2.75139	2	20	8	23	0	5.4	2.4	2.57143	1.28571	4.5	1.5	0	0	0	0	0	0	0	0	0	0	0	0	0	0	0	0	10.6062	R	0	0	0	0	0	6	3.5	0	0	0	0	0	0	0
6C2B8D64A0	57	Male	19.2979	0	0	2	76	16	153	0	0	0	58.5	3.21429	8.25	1.25	12	4	0	0	0	0	0	0	0	0	0	0	0	0	0	0	0	S	0	0	0	0	0	0	0	0	0	0	0	0	17	2
0E55CC6027	62	Male	58.7118	0	26.0549	3	30	41	41	4.8	18.4	2.4	49.1786	2.89286	4.75	1	0	0	4	0	0	0	0	0	0	0	0	0	0	0	0	0	12.5311	R	0	0	0.277778	0	0	0	0	0	0	0	0	0	0	0
08277102D7	66	Female	0	0	0	0	2	2	2	0	0	0	4.17857	1.60714	0	0	0	0	0	0	0	0	0	0	0	0	0	0	0	0	0	0	0	S	0	0	0	0	0	0	0	0	0	0	0	0	0	0
4D24BC00D5	76	Female	20.3965	8.52222	8.52222	0	48	91	114	1.2	32.8	6.8	19.9286	2.57143	4.66667	0.666667	0	0	3	0	0	0	0	0	0	0	0	0	0	0	0	0	692.391	R	0	0	0.777778	0	0	0	0	0	0	0	0	0	0	0
9920E4176F	63	Male	11.8222	0	1.02222	0	23	23	23	0	2	1	12.8571	1.28571	9.25	1	0	0	0	0	0	0	0	0	0	0	0	0	0	0	13	1	18.8652	R	0	0	0	0	0	0	0	0	0	0	0	0	0	0
172F754EF0	62	Male	0	0	0	1	15	15	15	0	0	0	0	0	0	0	0	0	0	0	0	0	0	0	0	0	0	0	0	0	0	0	0	S	0	0	0	0	0	0	0	0	0	0	15.5	1.5	0	0
16741D3DFD	36	Male	17.8507	0	4.01042	1	24	15	26	0	15.4	2.4	0	0	2.33333	1.33333	0	0	0	0	0	0	0	0	0	0	0	0	0	0	0	0	16.514	R	0	0	0	0	0	0	0	0	0	0	0	0	23	2
16F8756A12	89	Male	78.0674	0	13.5722	3	94	89	100	0	33	7	0	0	19.6667	2	0	0	0	0	0	0	5.35714	3.57143	0	0	0	0	0	0	0	0	3.75731	R	0	0	6.25421	0	0	0	0	0	0	0	8.5	1.5	54	7
C5831F61CF	71	Female	27.9194	0	0	2	40	40	48	0	0	0	0.642857	0.642857	6.83333	0.5	0	0	0	0	0	0	25	3.57143	0	0	0	0	0	0	0	0	22.933	R	0	0	0.222222	0	0	0	0	0	0	0	5.5	1	12.5	1.5
4735157949	74	Male	0	0	0	1	18	24	24	0	0	0	0	0	0	0	0	0	0	0	0	0	0	0	0	0	0	0	0	0	0	0	0	S	0	0	0	0	0	0	0	0	0	0	22	3	0	0
DD1D4756BE	75	Female	41.9722	13.8118	19.8826	0	44	68	82	0	21.8	4.8	20.8929	1.60714	30.3333	6.33333	29	6	7.5	0	0	0	28.5714	5.35714	0	0	0	0	0	0	0	0	4.74061	R	0	0	0	0	0	0	0	0	0	0	12.5	3.5	0	0
89AC4A0BB0	81	Female	5.64792	0	0	1	55	26	48	0	0	0	5.14286	1.28571	0	0	8	2	0	0	0	0	0	0	0	0	0	0	0	0	0	0	45.0678	R	0	0	0	0	0	0	0	0	0	0	25	5.5	0	0
086461ED04	51	Male	5.73403	1.91806	1.91806	1	23	23	23	0	3	1	6.42857	1.28571	22.3333	3.33333	0	0	5	0	0	0	0	0	0	0	0	0	0	0	0	0	23.3687	R	0	0	0	0	0	0	0	0	0	0	0	0	0	0
9898EEBDC5	67	Male	0	0	0	1	4	5	5	0	0	0	0	0	3.5	0.833333	0	0	0	0	0	0	0	0	0	0	0	0	0	0	0	0	0	S	0	0	0	0	0	0.5	0.5	0	0	0	0	0	0	0
3CED093980	80	Female	18.0215	0	0	3	198	198	198	0	0	0	0	0	21.5	2.5	9	2	1	0	0	0	0	0	0	0	0	0	0	0	2	1	68.9205	S	0	0	0.166667	0	0	0	0	0	0	0	15.5	1.5	64	8.5
B0CAC5FB24	82	Male	30.5389	0	1.08958	1	75	125	125	0	11.4	2.4	0	0	5.66667	1	23	9	3	0	3	1	0	0	0	0	0	0	0	0	21.5	4.5	0	S	0	1	0.416667	0	0	0	0	0	0	0	30.8333	3.33333	12.5	2
A3F84D8BDC	64	Male	35.8458	0	0	1	80	127	127	0	37	7	15.75	2.89286	29.75	4.75	7	2	3	0	0	0	0	0	0	0	0	0	0	0	0	0	21.8071	R	0	0	0	0	0	0	0	0	0	0	16.5	1.5	20	5
579BA216E3	52	Male	0	0	0	1	8	8	8	0	0	0	0	0	0	0	0	0	0	0	0	0	0	0	0	0	0	0	0	0	0	0	10.069	R	0	0	0	0	0	9.5	1.5	0	0	0	0	0	0	0
79E27540E7	57	Male	0	0	0	2	54	17	54	0	0	0	0	0	13.3333	1.33333	0	0	0	0	0	0	0	0	0	0	0	0	0	0	0	0	17.7515	R	0	0	0	0	0	0	0	0	0	0	0	0	9.5	2
A08345C13D	64	Male	3.67569	0	0	1	6	23	23	0	6	2	0.321429	0.321429	15.3333	1.33333	0	0	0	0	0	0	0	0	0	0	0	0	0	0	0	0	24.6664	R	0	0	0	0	0	0	0	0	0	0	0	0	15.5	3.5
A882011129	51	Male	0	0	0	4	41	23	42	0	0	0	11.25	1.60714	7	1	0	0	0	0	0	0	0	0	0	0	0	0	0	0	0	0	20.5313	R	0	0	0	0	0	0	0	0	0	0	0	0	14	5
3947406805	29	Female	31.2257	0	5.72153	5	33	31	53	2.4	30	5	0	0	0	0	0	0	0	0	0	0	0	0	0	0	0	0	0	0	18.5	1.5	17.0406	S	0	0	0	0	0	7	7	0	0	0	0	0	44.5	5.5
6F45B8D2B3	19	Male	23.4035	0	0	1	35	35	35	0	25.5	3.5	18.6429	1.92857	21	1	3	2	0	0	0	0	0	0	0	0	0	0	0	0	0	0	0	S	0	0	0	0	0	0	0	0	0	0	0	0	3.5	2
7940E01296	76	Male	14.9028	20.284	20.284	1	6	2	9	0	13.5	3	0	0	20.5	7	0	0	0	12	0	0	0	0	0	0	0	0	0	0	8	1	9.71957	R	0	0	0.166667	0	0	0	0	0	0	0	0	0	0.5	0.5
D4313036DB	30	Male	13.6597	0	0	0	20	20	20	0	0	0	5.14286	1.28571	0	0	0	0	0	0	0	0	0	0	0	0	0	0	0	0	0	0	14.7485	S	0	0	0.166667	0	0	1.625	0.625	0	0	0	10	2	12	3.5
C7FF75BEEE	60	Male	1.05903	0	0	2	17	4	12	0	0	0	0	0	5.33333	1.83333	0	0	0	0	0	0	0	0	0	0	0	0	0	0	0	0	0	S	0	0	0	0	0	0	0	0	0	0	0	0	0	0
83B28CF3AC	48	Male	8.17708	0	0	0	9	9	9	0	0	0	0	0	8.33333	1.33333	0	0	0	0	0	0	0	0	0	0	0	0	0	0	0	0	9.76079	R	0	0	0	0	0	0	0	0	0	0	0	0	7	4
17FF66A5DA	57	Male	0	0	0	1	35	8	40	0	0	0	5.14286	1.28571	7.33333	1.33333	0	0	0	0	0	0	0	0	0	0	0	0	0	0	0	0	28.3056	S	0	0	0	0	0	0	0	0	0	0	5.5	1.5	0	0
F075B78469	85	Female	6.95764	0	0	0	24	25	25	0	0	0	14.4643	1.60714	12.6667	3.66667	0	0	3	0	0	0	0	0	0	0	0	0	0	0	0	0	3.5384	R	0	0	0	0	0	0	0	0	0	0	0	0	0	0
C52EC573AA	77	Male	0	0	0	1	9	6	10	0	0	0	0.642857	0.642857	11.6667	2.66667	0	0	0	0	0	0	0	0	0	0	0	0	0	0	0	0	0	S	0	0	0	0	0	0.5	0.5	0	0	0	0	0	0	0
DCD22E3536	58	Male	0	0	0	2	10	10	10	0	0	0	9.96429	1.28571	0	0	0	0	0	0	0	0	0	0	0	0	0	0	0	0	0	0	4.91049	R	0	0	0	0	0	0	0	0	0	0	0	0	0	0
67537319FA	62	Female	0	0	0	1	12	2	13	0	0	0	4.82143	1.92857	0	0	0	0	0	0	0	0	0	0	0	0	0	0	0	0	0	0	5.94325	R	0	0	0	0	0	0	0	0	0	0	0	0	0	0
0C14A4B2B3	57	Male	0	0	0	1	0	1	1	0	0	0	0	0	0	0	0	0	0	0	0	0	0	0	0	0	0	0	0	0	0	0	4.27772	R	0	0	0	0	0	0	0	0	0	0	3	2	1.75	1.75
DC6A4A7E14	20	Male	2.73125	0	0	0	3	3	3	0	0	0	0	0	5	2	0	0	0	0	0	0	0	0	0	0	0	0	0	0	0	0	4.51236	R	0	0	0	0	0	0	0	0	0	0	0	0	0	0
C695608527	69	Male	4.78056	0	3.03194	1	11	11	11	0	10.5	3	0	0	9.33333	1.33333	0	0	2	0	0	0	0	0	0	0	0	0	0	0	0	0	4.40713	R	0	0	0.388889	0	0	0	0	0	0	0	0	0	6.5	2
00AFCBEA61	65	Male	11.9569	0	0	1	36	16	26	0	0	0	7.07143	3.21429	0	0	0	0	0	0	0	0	0	0	0	0	0	0	0	0	0	0	0	S	0	0	0	0	0	0	0	0	0	0	6	2	24.5	3.5
CB802EEDEF	49	Male	2.01944	0	0	1	8	13	13	0	0	0	11.8929	2.89286	5	1	0	0	3	0	0	0	0	0	0	0	0	0	0	0	0	0	3.52237	R	0	0	0	0	0	0	0	0	0	0	0	0	0	0
99C5B733DF	81	Female	0	0	0	1	0	13	13	0	0	0	0	0	2.16667	0.666667	0	0	0	0	0	0	0	0	0	0	0	0	0	0	0	0	0	S	0	0	0	0	0	0	0	0	0	0	5	2	12.25	1.75
31CCEA850E	81	Male	15.6562	0	0	1	20	20	20	0	18.4	2.4	0	0	24	4	3	2	0	0	0	0	0	0	0	0	0	0	0	0	0	0	0	S	0	0	0	0	0	0	0	0	0	0	0	0	0	0
C0F2F60FBE	48	Male	15.1993	0	0	2	91	17	36	0	0	0	0	0	13.3333	2.33333	0	0	0	0	0	0	0	0	0	0	0	0	0	0	0	0	8.60351	R	0	0	0.222222	0	0	0	0	0	0	0	0	0	10	4
31F1C71F47	25	Male	11.0528	0	0	1	14	16	16	0	0	0	0	0	18.3333	2.33333	0	0	0	0	0	0	7.14286	5.35714	0	0	0	0	0	0	14.5	3.5	11.2932	R	0	0	0.166667	0	0	0	0	0	0	0	0	0	0	0
6A53EC372C	69	Male	7.13889	5.77847	5.77847	1	14	8	17	0	9	3	0	0	12.1667	1.83333	0	0	0	0	0	0	0	0	0	0	0	0	0	0	0	0	11.6176	R	0	0	0	0	0	0	0	0	0	0	7.5	1.5	3.5	2
C4A3C0C4B4	42	Male	5.86319	0	0	1	11	22	22	0	0	0	10.2857	1.60714	15	2	0	0	0	0	0	0	0	0	0	0	0	0	0	0	0	0	11.3369	R	0	0	0.333333	0	0	0	0	0	0	0	0	0	0	0
5168DE621E	67	Male	7.15208	0	0	0	2	47	50	2.4	0	0	0	0	9.25	1.25	0	0	6	0	0	0	14.2857	3.57143	0	0	0	0	0	0	0	0	15.8479	R	0	0	0	0	0	3	1.5	0	0	0	0	0	38.5	4
5CBD9C66FD	55	Female	15.0361	0	0	0	17	18	18	0	0	0	3.21429	1.28571	11.6667	1.66667	0	0	0	0	0	0	35.7143	7.14286	0	0	0	0	0	0	0	0	18.0502	R	0	0	0	0	0	0	0	0	0	0	0	0	0	0
0F7ABA1728	55	Male	14.6743	0	0	3	29	29	51	0	0	0	0	0	9.33333	1.33333	0	0	0	0	0	0	0	0	0	0	0	0	0	0	7	1	18.5816	R	0	0	0	0	0	0	0	0	0	0	2	2	24.75	3.75
9F7DEE7804	65	Male	2.83194	0	0	2	3	18	18	0	6	4	13.8214	2.25	3.16667	0.666667	0	0	0	0	0	0	8.92857	3.57143	0	0	0	0	0	0	0	0	15.2018	R	0	0	0	0	0	0	0	0	0	0	0	0	2.25	1.25
F9C486DFAF	72	Female	0	0	0	1	11	13	15	0	1	1	2.25	1.28571	13.6667	2.66667	0	0	0	0	0	0	0	0	0	0	0	0	0	0	0	0	10.3184	R	0	0	0	0	0	0	0	0	0	0	0	0	0	0
55F1A2D4C4	82	Female	5.05625	0	0	1	5	6	6	0	0	0	0	0	6.33333	1.33333	0	0	0	0	0	0	0	0	0	0	0	0	0	0	0	0	4.77951	R	0	0	0	0	0	0	0	0	0	0	3.5	2.5	0	0
52CB876F64	82	Male	16.7514	0	1.76528	0	17	17	18	0	0	0	0	0	2.16667	0.666667	16	2	0	0	0	0	0	0	0	0	0	0	0	0	6.5	1.5	3.90635	R	0	0	0	0	0	0	0	0	0	0	34.5	3	0	0
83A782FB36	81	Male	11.7556	0	0	0	31	31	31	0	0	0	0.321429	0.321429	19.3333	1.33333	0	0	3	0	0	0	0	0	0	0	0	0	0	0	0	0	0	S	0	0	0	0	0	0	0	0	0	0	2.75	0.75	0	0
AA132CC1A1	58	Male	23.8347	0	8.13056	0	81	106	106	0	52.5	7.5	56.25	2.89286	2.33333	1.33333	0	0	0	0	0	0	0	0	0	0	0	0	0	0	0	0	0	S	0	0	0	0	0	0	0	0	0	0	51.75	3.75	0	0
283075F5EC	31	Male	22.5958	5.53611	5.53611	4	11	23	27	0	8.5	2.5	1.28571	1.28571	15.5	2	0	0	3	0	0	0	0	0	0	0	0	0	0	0	0	0	14.9206	R	0	0	0.194444	0	0	0	0	0	0	0	2.5	1.5	0	0
AB65523CB7	30	Male	9.61875	0	0	2	16	11	20	0	0	0	0	0	25	4	0	0	3	0	0	0	0	0	0	0	0	0	0	0	0	0	0	S	0	0	0	0	0	0	0	0	0	0	0	0	0	0
3F9648A4CB	55	Male	8.91042	0	0	2	19	18	19	0	0	0	0	0	13.5	0.833333	0	0	0	0	0	0	0	0	0	0	0	0	0	0	0	0	8.80101	R	0	0	0.25	0	0	0	0	0	0	0	0	0	0	0
373EEA80A1	74	Female	41.366	2.06806	17.766	0	5	48	48	0.6	15.5	3.5	0	0	8	2	0	0	2	0	0	0	16.0714	3.57143	0	0	0	0	0	0	21.5	3.5	13.7741	R	0	0	0.388889	0	0	0	0	0	0	0	0	0	52.5	9
50CB7F3FB3	73	Male	10.8729	1.2	1.2	0	10	10	0	0	0	0	0	0	7.5	0.833333	6	1	0	0	0	0	0	0	0	0	0	0	0	0	0	0	5.71895	R	3.6	0	0	0	0	0	0	0	0	0	0	0	0	0
720A064253	53	Male	14.9236	0	0	4	55	14	44	0	0	0	10.6071	1.60714	9.5	2	0	0	0	0	0	0	0	0	0	0	0	0	0	0	0	0	0	S	0	0	0	0	0	0	0	0	0	0	0	0	0	0
0126B46BEB	42	Male	9.87847	0	0	0	23	31	31	0	0	0	8.03571	2.57143	10.3333	0.833333	0	0	0	0	0	0	0	0	0	0	0	0	0	0	11	1	4.96826	R	0	0	0	0	0	0	0	0	0	0	0	0	0	0
301D3B6300	39	Male	0	0	0	4	28	1	4	0	0	0	0	0	0	0	2	1	0	0	0	0	0	0	0	0	0	0	0	0	0	0	0	S	0	0	0	0	0	0	0	0	0	0	0	0	0	0
63160A371E	45	Female	0	0	0	0	6	6	6	0	0	0	6.10714	1.28571	0	0	0	0	0	0	0	0	0	0	0	0	0	0	0	0	0	0	0	S	0	0	0	0	0	0	0	0	0	0	0	0	0	0
6C70DC436C	67	Female	26.2153	0	1.68472	1	35	38	38	2.4	0	0	0	0	14.3333	1.33333	0	0	0	0	0	0	1.78571	1.78571	0	0	0	0	0	0	0	0	12.92	R	0	0	1.9697	0	0	0	0	0	0	0	25.25	6.25	0	0
95D934966B	73	Female	0	0	0	0	1	1	1	0	0	0	2.25	1.28571	0.666667	0.666667	3	2	2	0	0	0	0	0	0	0	0	0	0	0	0	0	0	S	0	0	0	0	0	0	0	0	0	0	0	0	0	0
922A94F07E	66	Male	0	12.9153	12.9153	1	23	23	23	0	40	12	0	0	24.3333	2.33333	0	0	0	0	0	0	26.7857	3.57143	0	0	0	0	0	0	0	0	6.94906	R	0	0	0	0	0	0	0	0	0	0	3	2	0	0
772E0B4B60	35	Male	42.0167	10.5125	28.8271	7	25	1	61	0	27	4	29.8929	2.89286	8.16667	0.666667	0	0	0	0	0	0	0	0	0	0	0	0	0	0	26.5	4.5	0	S	0	0	0.166667	0	0	0	0	0	0	17	0	0	0	0
0C219CD04D	31	Male	36.9347	0	24.9208	1	19	42	42	0	13.875	1.125	7.71429	0.964286	3.66667	0.666667	0	0	0	0	0	0	25	1.78571	0	0	0	0	0	0	0	0	20.2998	R	0	0	0	0	0	0	0	0	0	16	27.5	1.25	7.5	1.5
98F6666BCE	71	Male	40.1146	27.0688	27.0688	1	11	40	40	0	20.4	3.4	3.21429	1.28571	24.1667	1.83333	0	0	0	0	0	0	23.2143	3.57143	0	0	0	0	0	0	0	0	19.9244	R	0	0	0.333333	0	0	0	0	0	0	0	4	1	0	0
605B6D24C2	76	Male	0	0	0	0	1	1	1	0	0	0	0	0	2.33333	1.33333	0	0	0	0	0	0	0	0	0	0	0	0	0	0	0	0	3.62541	R	0	0	0	0	0	0	0	0	0	0	0	0	0	0
9E28DA6861	77	Male	18.4299	4.96597	6.64931	0	17	50	48	0	36	4	5.46429	1.60714	11.4167	1.91667	5	2	0	0	0	0	0	0	0	0	0	0	0	0	0	0	21.6471	S	0	0	1.59596	0	0	0	0	0	0	0	19.6667	4.16667	0	0
E29558BE22	51	Male	17.7694	1.94861	1.94861	1	16	16	16	0	0	0	3.21429	1.28571	14.3333	1.33333	0	0	0	0	0	0	25	3.57143	0	0	0	0	0	0	0	0	0	S	0	0	0.166667	0	0	0	0	0	0	0	0	0	0	0
CD87B60263	73	Female	111.291	1.99861	21.0639	9	81	123	124	8.4	45.9	7.4	0	0	27.8333	3.33333	46	10	2	0	0	0	0	0	0	0	0	0	0	0	21.5	5.5	28.2743	S	0	0	2.87121	0	0	0	0	0	0	10.3333	28	3	17	2
648CA26C4F	53	Male	17.5021	0	9.78056	3	99	100	100	0	28.5	7.5	22.1786	2.89286	10.3333	1.83333	0	0	0	0	0	0	0	0	0	0	0	0	0	0	10	2	0	S	0	0	0	0	0	0	0	0	0	0	9	3.5	0	0
06867DC19F	20	Female	0	0	0	0	13	4	13	0	0	0	11.8929	1.28571	0	0	0	0	0	0	0	0	0	0	0	0	0	0	0	0	0	0	0	S	0	0	0	0	0	0	0	0	0	0	0	0	0	0
D5C3A8B6DB	58	Male	12.15	0	0	2	30	19	35	0	0	0	0	0	8.16667	0.666667	0	0	0	0	0	0	0	0	0	0	0	0	0	0	0	0	9.80652	R	0	0	0	0	0	0	0	0	0	0	4	1.5	0	0
24F5F4FA16	43	Male	7.66181	0	0	1	10	9	10	0	0	0	0	0	20.5	2.5	0	0	0	0	0	0	17.8571	3.57143	0	0	0	0	0	0	0	0	11.4381	R	0	0	0	0	0	0	0	0	0	0	0	0	0	0
9DA87E4BC6	80	Male	20.8667	0	0	0	33	16	34	0	0	0	0	0	9.41667	2.41667	0	0	0	0	0	0	0	0	0	0	0	0	0	0	0	0	71.7676	S	0	0	0	0	0	0	0	0	0	0	0	0	25.5	3.5
828C9FF923	52	Female	0	0	0	2	32	1	26	0	0	0	5.14286	1.28571	0	0	0	0	0	0	0	0	0	0	0	0	0	0	0	0	0	0	0	S	0	0	0	0	0	0	0	0	0	0	0	0	0	0
A005D6E70E	92	Male	24.9	0	0	0	14	31	31	0	28	6	0	0	2.66667	1.16667	0	0	0	0	0	0	0	0	0	0	0	0	0	0	7.5	1.5	16.8313	R	0	0	0.222222	0	0	0	0	0	0	0	11.25	1.25	34.25	5.25
33119B16C8	87	Male	18.0694	0	8.86111	1	9	16	16	0	18.4	2.4	0	0	10.8333	4.83333	5	2	0	0	0	0	0	0	0	0	0	0	0	0	9.5	2.5	16.3604	S	0	0	0	0	0	0	0	3.6	3.6	0	6.5	2	12.5	2
B7BA3AACEC	85	Male	0	0	0	0	14	12	14	0	0	0	0	0	23	2	0	0	0	0	0	0	0	0	0	0	0	0	0	0	0	0	9.71508	R	0	0	0	0	0	0	0	0	0	0	0	0	0	0
F5C44D62D8	88	Male	0	0	0	2	0	7	0	0	0	0	0	0	0	0	0	0	0	0	0	0	0	0	0	0	0	0	0	0	0	0	12.7308	R	0	0	0	0	0	0	0	0	0	0	0	0	15.5	2
2C6B2D0611	81	Female	23.1826	11.3917	11.3917	1	44	24	44	0	6	0.5	0	0	27.8333	3.83333	0	0	0	0	0	0	0	0	0	0	0	0	0	0	0	0	33.937	R	0	0	0.277778	0	0	0	0	0	0	0	0	0	0	0
716F675114	20	Female	0	0	0	1	6	2	6	0	0	0	9.32143	1.60714	0	0	0	0	0	0	0	0	0	0	0	0	0	0	0	0	0	0	0	S	0	0	0	0	0	0	0	0	0	0	0	0	0	0
D65012F1A7	76	Female	11.2222	6.60139	6.60139	3	13	13	13	0	9.4	2.4	0	0	6.66667	0.666667	0	0	0	0	0	0	25	3.57143	0	0	0	0	0	0	0	0	8.59425	R	0	0	0	0	0	0	0	0	0	0	0	0	0	0
94BA49BE8B	70	Male	22.1611	0	5.88194	0	18	18	18	0	17.9	5.4	0	0	8.75	2	9	1	0	0	0	0	0	0	0	0	0	0	0	0	0	0	4.35944	R	0	0	0.277778	0	0	0	0	0	0	0	0	0	8.25	2.25
9DFA413011	32	Female	3.85694	0	0	3	8	8	8	0	0	0	0	0	8.33333	1.33333	0	0	0	0	0	0	0	0	0	0	0	0	0	0	0	0	10.9965	R	0	0	0	0	0	0	0	0	0	0	4	3	0	0
23928167C6	69	Male	16.8014	0	4.83472	0	0	16	17	0	13	1	6.10714	2.89286	9	1.5	0	0	0	0	0	0	25	3.57143	0	0	0	0	0	0	2	1	0	S	0	0	0	0	0	0	0	0	0	0	0	0	0	0
7647CED290	71	Male	10.0583	0	1.01736	1	12	29	29	0	3.4	2.4	8.35714	2.57143	11.3333	3.83333	0	0	0	0	0	0	7.14286	5.35714	0	0	0	0	0	0	2.5	1.5	18.506	S	0	0	0.333333	0	0	2	2	0	0	0	0	0	22	4
B083CC1BAA	85	Female	22.0694	4.01319	4.01319	1	35	35	0	0	14.4	2.4	0	0	10.3333	0.833333	0	0	0	0	0	0	0	0	0	0	0	0	0	0	0	0	0	S	0	0	0	0	0	0	0	0	0	0	0	0	14	2
906B466E38	61	Male	2.93819	0	0	0	4	4	4	0	5.4	2.4	0	0	3.5	0.833333	0	0	0	0	0	0	0	0	0	0	0	0	0	0	0	0	9.84053	R	0	0	0	0	0	0	0	0	0	0	0	0	0	0
A7C5D5D7EB	92	Male	95.4979	0	29.4097	2	220	226	226	0	36	4	9	1.28571	62.3333	12.5	16	3	2	10.6667	0	0	0	0	0	0	0	0	0	0	0	0	7.93794	R	0	0	1.44444	0	0	0	0	0	0	25	39.75	4.25	88	10
1AD2BBECA7	65	Male	7.70139	0	0	2	31	15	31	0	0	0	0	0	6.16667	1.16667	0	0	0	0	0	0	0	0	0	0	0	0	0	0	0	0	23.5584	R	0	0	0.25	0	0	0.75	0.75	0	0	0	0	0	17	2
DBE20C22A6	60	Female	0	0	0	2	14	14	14	0	0	0	11.8929	1.28571	0	0	0	0	0	0	0	0	0	0	0	0	0	0	0	0	0	0	13.9777	R	0	0	0	0	0	0	0	0	0	0	2.5	1	0	0
12A53F9FD5	78	Male	5.91319	0	0	1	24	24	24	0	0	0	18.6429	1.28571	0	0	8	2	0	0	0	0	0	0	0	0	0	0	0	0	0	0	23.7187	R	0	0	0	0	0	0	0	0	0	0	0	0	11	2
66D811E3E0	82	Male	20.0306	2.81528	2.81528	0	21	13	21	0	8.5	5.5	0	0	5.5	0.5	5	2	0	0	0	0	0	0	0	0	0	0	0	0	17.5	1.5	24.7808	S	0	0	0	0	0	0	0	0	0	0	0	0	18.5	2
A570865793	39	Male	2.81319	0	1.8375	2	13	15	28	0	0	0	0	0	8.16667	1.5	0	0	0	0	0	0	7.14286	3.57143	0	0	0	0	0	0	0	0	10.0251	R	0	0	0.25	0	0	0	0	0	0	0	4.5	2.5	6.5	2
E1D0D55ACF	25	Male	0	0	0	1	16	12	12	0	0	0	0	0	0	0	0	0	0	0	0	0	0	0	0	0	0	0	0	0	0	0	7.68223	R	0	0	0	0	0	9.5	1.5	0	0	0	3.5	1.5	0	0
31FF276537	58	Female	5.78056	0	0	1	19	19	19	0	0	0	12.8571	1.28571	0	0	0	0	0	0	0	0	0	0	0	0	0	0	0	0	0	0	0	S	0	0	0	0	0	0	0	0	0	0	8.25	1.25	0	0
E4FD5B0F06	61	Male	0	0	0	1	17	8	9	0	0	0	0.321429	0.321429	4.66667	0.666667	0	0	0	0	0	0	0	0	0	0	0	0	0	0	0	0	7.48468	R	0	0	0	0	0	0	0	0	0	0	0.5	0.5	0	0
A31A2E803C	43	Male	0	0	0	1	3	3	3	0	0	0	2.89286	1.60714	0	0	0	0	0	0	0	0	5.35714	5.35714	0	0	0	0	0	0	0	0	0	S	0	0	0	0	0	2.5	1.5	0	0	0	0	0	0	0
21E56D4603	56	Male	6.08958	0	3.17986	1	10	10	10	0	5.4	3.4	0	0	4.66667	0.666667	0	0	3.5	0	0	0	17.8571	5.35714	0	0	0	0	0	0	0	0	11.2209	R	0	0	0.333333	0	0	0	0	0	0	0	4.16667	1.66667	0.5	0.5
88799E48E3	89	Female	4.73611	0	0	1	14	13	6	0	0	0	6.10714	1.92857	0	0	0	0	0	0	0	0	0	0	0	0	0	0	0	0	7.5	1.5	7.95306	R	0	0	0	0	0	3	2	0	0	0	16.5	7.5	17	2
469A6DC579	62	Male	0	0	0	0	12	6	14	0	0	0	0	0	13.1667	2.5	0	0	0	0	0	0	0	0	0	0	0	0	0	0	0	0	17.6299	R	0	0	0	0	0	0	0	0	0	0	0	0	5	2
F3148F1B94	58	Male	8.82361	0	0	1	54	30	29	0	4	1	30.2143	1.92857	0	0	0	0	0	0	0	0	0	0	0	0	0	0	0	0	0	0	0	S	0	0	0	0	0	3.75	0.75	0	0	0	0	0	0	0
2F8BDB97AA	66	Male	0	0	0	1	17	62	62	0	0	0	0	0	30	2	0	0	0	0	0	0	0	0	0	0	0	0	0	0	0	0	28.8036	R	0	0	0	0	0	0	0	0	0	0	10.25	2.25	0	0
202C8C3F80	90	Male	0	0	0	2	25	20	30	0	0	0	0	0	23.3333	4.16667	0	0	0	0	0	0	0	0	0	0	0	0	0	0	0	0	20.8719	R	0	0	0	0	0	0	0	0	0	0	17.5	6	7	2.5
A251D0A1F1	85	Male	0	0	0	1	8	13	13	0	0	0	0	0	0	0	0	0	0	0	0	0	0	0	0	0	0	0	0	0	0	0	3.89596	R	0	0	0	0	0	0	0	0	0	0	14.5	1.5	0	0
16FF7CACCC	51	Female	6.75139	0	0	3	11	16	18	0	18	4	0	0	12.8333	0.833333	0	0	0	0	0	0	0	0	0	0	0	0	0	0	0	0	5.59685	R	0	0	0	0	0	0	0	0	0	0	0	0	0	0
FD8005E1E3	55	Male	9.63819	0	0	2	11	11	14	0	0	0	0	0	9.91667	1.91667	5	2	0	0	0	0	0	0	0	0	0	0	0	0	8.5	1.5	6.81103	R	0	0	0	0	0	0	0	0	0	0	0	0	6	1.5
7813916B69	85	Male	12.6694	0	0	1	13	0	0	0	0	0	14.7857	2.25	0	0	0	0	0	0	0	0	0	0	0	0	0	0	0	0	16.5	3.5	0	S	0	0	0	0	0	0	0	0	0	0	0	0	0	0
D549A2A82B	78	Female	12.9722	0	0	1	42	43	43	0	33	3	18	2.57143	8.33333	1.33333	0	0	0	0	0	0	0	0	0	0	0	0	0	0	0	0	7.03355	R	0	0	0	0	0	0	0	0	0	0	15.75	4	0	0
74AC9D268B	31	Female	70.2222	47.1361	91.7007	22	91	5	105	6.4	0	0	24.4286	2.89286	29.6667	2.83333	0	0	0	0	0	0	0	0	0	0	0	0	0	0	18	2	20.7836	S	0	0	0.555556	0	0	0	0	0	0	0	0	0	0	0
050607258B	54	Male	12.5792	6.30764	6.30764	3	8	12	14	0	9.9	3.9	0	0	9.33333	1.5	0	0	0	0	0	0	0	0	0	0	0	0	0	0	0	0	13.5945	R	0	0	0	0	0	0	0	0	0	0	0	0	2	2
4AE909C33F	75	Female	0	0	0	0	2	0	4	0	0	0	9.32143	2.25	10.25	2.25	0	0	0	0	0	0	0	0	0	0	0	0	0	0	2	1	0	S	0	0	0	0	0	0	0	0	0	0	0	0	1.75	1.75
E82641D830	75	Male	40.5	0	0	5	19	50	50	0	13.5	3	0	0	9.33333	1.33333	7	2	0	0	0	0	0	0	0	0	0	0	0	0	4.5	1.5	18.0623	R	0	0	0.333333	0	0	0	0	0	0	0	21	3	55	5.5
316DC189E9	67	Male	36.6611	2.99514	2.99514	4	41	61	0	0	0	0	0	0	44.1667	4.33333	6	1	0	0	0	0	0	0	5	2	0	0	0	0	0	0	3.75921	R	0	0	0.555556	0	0	0	0	0	0	0	41	5.5	3.5	2
18E0AC37DA	41	Male	6.01875	0	0	0	21	6	12	0	0	0	8.03571	1.28571	0	0	0	0	0	0	0	0	0	0	0	0	0	0	0	0	7.5	1.5	6.95012	R	0	0	0	0	0	0	0	0	0	0	0	0	6.5	2
1B7FF153ED	49	Female	9.84444	0	0	1	0	43	0	0	0	0	9.32143	1.60714	13.6667	0.666667	0	0	0	0	0	0	0	0	0	0	0	0	0	0	0	0	19.7992	R	0	0	0	0	0	0	0	0	0	0	0	0	18.5	2
197B72C790	67	Male	0	0	0	1	20	10	24	0	0	0	0	0	0	0	0	0	0	0	0	0	0	0	0	0	0	0	0	0	0	0	6.99631	R	0	0	0	0	0	3	1	0	0	0	0	0	12.5	2
7280335C9C	73	Male	0	0	0	0	15	25	25	0	0	0	9.96429	1.28571	7.33333	0.666667	0	0	0	0	0	0	0	0	0	0	0	0	0	0	0	0	15.6512	R	0	0	0	0	0	0	0	0	0	0	1.5	0.5	0	0
A53E41AFAC	42	Male	37.0535	7.28194	24.6632	0	28	32	26	1.8	28	4	0	0	21.3333	3.33333	0	0	1.5	0	0	0	0	0	0	0	0	0	0	0	16.25	5.25	561.651	R	0	0	0.833333	0	0	0	0	0	0	0	6.25	0.75	0	0
0B007B20F5	59	Male	0	0	4.89583	7	10	8	17	0	0	0	4.17857	1.28571	5.5	0.833333	0	0	0	0	0	0	0	0	0	0	0	0	0	0	0	0	0	S	0	0	0.979798	0	0	0	0	0	0	0	7.91667	1.66667	5	2
253B4EDB7F	58	Male	5.22292	0	0	3	13	13	13	0	0	0	12.8571	1.28571	1.16667	0.666667	0	0	0	0	0	0	0	0	0	0	0	0	0	0	7.5	1.5	8.40402	R	0	0	0	0	0	0	0	0	0	0	1	1	0	0
3F87A27830	54	Male	40.5368	2.80069	16.2319	1	30	35	35	0	2.5	1	0	0	20.3333	4.33333	0	0	0	0	0	0	28.5714	3.57143	0	0	0	0	0	0	0	0	19.9079	S	0	0	0.305556	0	0	0	0	0	0	0	3.5	1	23	2
F3FB1DFFE0	93	Male	2.20972	0	0	0	2	0	2	0	0	0	0	0	0	0	4	2	0	0	0	0	0	0	0	0	0	0	0	0	0	0	0	S	0	0	0	0	0	0	0	0	0	0	0	0	5	2
0CAEF1F40E	78	Male	31.1778	0	5.31736	0	28	24	26	0	26.4	2.4	0	0	4	0.5	0	0	0	0	0	0	0	0	0	0	0	0	0	0	0	0	0	S	0	0	0.333333	0	0	0	0	0	0	0	45	2.25	0	0
45CAECC95A	58	Male	47.3812	0	36.7042	0	53	71	71	4.2	0	0	22.5	2.25	2	0.5	25	3	8	0	0	0	0	0	16.5	2.5	0	0	0	0	0	0	30.8786	S	0	0	0.277778	0	0	13	2	0	0	0	0	0	14	3.5
4B894D614B	42	Male	7.70417	0	0	0	8	7	8	0	0	0	0	0	7.33333	1.33333	0	0	0	0	0	0	0	0	0	0	0	0	0	0	10.5	2.5	0	S	0	0	0	0	0	0	0	0	0	0	4	2	0	0
2BE522C709	54	Female	0	0	0	0	13	6	0	0	0	0	0	0	4.66667	0.666667	0	0	0	0	0	0	0	0	0	0	0	0	0	0	0	0	13.6018	S	0	0	0	0	0	0	0	0	0	0	0	0	0	0
76336D9D88	78	Male	96.5736	8.01181	46.6701	0	76	77	78	0	0	0	11.8929	1.28571	28.25	4.5	0	0	3.5	0	1.66667	1	0	0	9.75	0.75	0	0	0	0	11	2	17.8802	R	0	0	0.861111	0	0	10.25	0.75	0	0	0	0	0	25	7
98562F6772	89	Male	34.0826	7.225	14.8007	0	33	21	0	0	4	2	0	0	9.5	0.833333	0	0	0	0	0	0	0	0	0	0	0	0	0	0	11.5	2.5	0	S	0	0	1.59848	0	0	0	0	0	0	0	21.25	6.25	12.5	2
EC2B573832	50	Male	62.4424	1.27986	8.64097	0	66	66	66	0	24	2	0	0	17.3333	2.33333	0	0	12	0	0	0	17.8571	3.57143	0	0	0	0	0	0	0	0	67.9011	R	0	0	0	0	0	0	0	0	0	0	74.25	6.75	34.5	6
E48570E07D	65	Male	0	0	0	0	1	1	0	0	0	0	2.25	1.28571	0	0	0	0	0	0	0	0	0	0	0	0	0	0	0	0	0	0	0	S	0	0	0	0	0	0	0	0	0	0	0	0	0	0
F699C56B27	58	Male	27.5785	0	10.6785	1	33	35	35	0	22	4	0	0	0	0	0	0	2	0	0	0	0	0	0	0	0	0	0	0	13.5	2.5	22.8543	R	0	0	2.77778	0	0	0	0	0	0	0	0	0	30.5	3.5
E39DCE25FB	72	Female	0	0	0	2	12	7	12	0	0	0	0	0	8.83333	1.83333	0	0	0	0	0	0	0	0	0	0	0	0	0	0	0	0	0	S	0	0	0	0	0	3	1	0	0	0	0	0	0	0
A436952B67	64	Male	13.6979	8.76181	8.76181	2	1	44	44	0	11	2	0	0	35.3333	2.33333	0	0	0	0	0	0	0	0	0	0	0	0	0	0	0	0	5.66714	R	0	0	0.305556	0	0	1	1	0	0	6	0	0	15.5	2
4990CF5201	68	Male	4.67917	0	0	1	15	5	13	0	0	0	7.07143	1.28571	0	0	7	2	0	0	0	0	0	0	0	0	0	0	0	0	0	0	3.84947	R	0	0	0	0	0	0	0	0	0	0	1.25	0.75	0	0
6185820D89	86	Female	1.00694	0	0	1	38	56	57	0	0	0	0	0	17.5	2.16667	24	1	0	0	0	0	0	0	0	0	0	0	0	0	0	0	20.7661	R	0	0	0	0	0	0	0	0	0	0	0	0	0	0
44632AA519	86	Male	35.6903	5.88819	17.9785	0	88	15	63	0	32	6.5	9.32143	1.60714	27	4	0	0	0	0	0	0	0	0	0	0	0	0	0	0	37	5	0	S	0	0	0.277778	0	0	0	0	0	0	0	0	0	20.5	4
3C85784B38	81	Male	118.421	11	31.8917	2	468	1130	88	8	30.8	7.8	31.8214	4.82143	62.1667	10.6667	132	30	2	0	0	0	0	0	0	0	0	0	0	0	60	8	10.705	S	0	0	1	0	0	83.75	19.75	0	0	0	336.875	52.875	3	1.5
A1CB009C51	74	Male	6.01458	8.12778	8.12778	0	11	23	23	0	12.9	3.9	11.8929	1.28571	9.33333	2	8	2	0	0	0	0	8.92857	3.57143	0	0	0	0	0	0	0	0	0	S	0	0	0	0	0	0	0	0	0	0	1	1	0	0
8A17B1FD48	85	Male	10.0403	1.34722	7.04167	0	12	13	21	0	13.5	1.5	0	0	4	1.5	0	0	3	0	0	0	0	0	0	0	0	0	0	0	9.5	2.5	22.7604	R	0	0	0	0	0	0	0	0	0	0	0	0	15.5	2
9804EC7C29	92	Male	41.6285	0	0	1	45	163	163	0	0	0	11.5714	1.92857	17.8333	1.83333	0	0	2	0	0	0	0	0	0	0	0	0	0	0	8.5	1.5	69.8223	S	0	0	4.81818	0	0	0	0	0	0	0	18.75	1.25	35.5	4
B23DE7A907	89	Male	293.96	60.8285	148.462	3	779	1046	1046	5.4	223.7	48.3	35.3571	4.5	172.167	29.75	12	2	21.5	0	0	0	151.786	28.5714	0	0	0	0	0	0	0	0	108.624	S	0	0	11.4217	0	0	0	0	0	0	25	141.333	17.8333	232.75	40.75
2A02F5C2DD	78	Male	2.74028	0	0	2	13	6	6	0	0	0	0	0	7.33333	2.33333	0	0	0	0	0	0	0	0	0	0	0	0	0	0	0	0	9.92017	R	0	0	0	0	0	0	0	0	0	0	2	1	0	0
32498250CF	88	Female	19.0646	1.73264	1.73264	0	36	17	17	0	21.4	5.4	0	0	14.5	3.5	0	0	5	0	0	0	0	0	0	0	0	0	0	0	6.5	2.5	0	S	0	0	0	0	0	0	0	0	0	0	0	0	5.5	2.5
64A5E0067D	81	Male	50.8729	6.95833	35.9653	7	48	21	37	0	53.5	8	21.2143	2.89286	4.33333	1.66667	9	2	0	0	0	0	62.5	7.14286	0	0	0	0	0	0	0	0	211.786	R	0	3.5	0.444444	0	0	0	0	0	0	0	2.91667	1.66667	18	4
CD913C1ABE	84	Male	9.54722	0	0	0	19	21	0	0	17	2	0	0	8	2	0	0	0	0	0	0	0	0	0	0	0	0	0	0	0	0	23.9125	R	0	0	0	0	0	0	0	0	0	0	0.75	0.75	0	0
9DAC3E1F9B	83	Female	1.89167	1.96667	1.96667	3	9	12	0	0	0	0	0.321429	0.321429	6.16667	0.666667	0	0	0	0	0	0	0	0	0	0	0	0	0	0	0	0	0	S	0	0	0.388889	0	0	0	0	0	0	0	0	0	0	0
BF7546C91B	76	Female	4.99375	0	3.61181	0	9	10	10	0	29	11	9.96429	2.25	2	1	6	2	0	0	0	0	0	0	0	0	0	0	0	0	0	0	10.4415	R	0	0	0	0	0	0	0	0	0	0	0	0	0	0
175184C301	85	Male	5.03611	0	6.975	1	1	0	11	0	18	4	0	0	6.25	1.75	0	0	0	0	0	0	0	0	0	0	0	0	0	0	8.5	1.5	0	S	0	0	0.194444	0	0	0	0	0	0	0	18.75	1.25	3	1.5
A844B0A79F	61	Male	0	0	0	1	16	16	16	0	0	0	0	0	9.33333	1.33333	0	0	0	0	0	0	0	0	0	0	0	0	0	0	0	0	0	S	0	0	0	0	0	0	0	0	0	0	9	1	0	0
B329792319	76	Female	9.46806	0	0	0	11	11	11	1.2	0	0	10.9286	1.28571	0	0	11	1	0	0	0	0	0	0	0	0	0	0	0	0	0	0	7.57194	R	0	0	0	0	0	0	0	0	0	0	0	0	0	0
D53DF2AA57	90	Male	86.1951	0	14.3771	5	149	149	149	3	56	4	0	0	24.8333	2.83333	0	0	2.5	0	0	0	0	0	0	0	0	0	0	0	0	0	2.91678	R	0	0	1.94444	0	0	0	0	0	0	0	90.25	8	0	0
959BA93142	85	Male	18.8604	0	0	1	41	57	63	0	7	1	0	0	20	1.5	0	0	2	0	0	0	0	0	0	0	0	0	0	0	0	0	11.6706	R	0	0	0.5	0	0	0	0	0	0	0	24.5	3.5	15.5	2
0DE7DCDA5E	73	Female	28.725	0	14.1986	0	44	36	44	2.4	45.5	8	27.9643	4.82143	9.5	0.833333	18	6	0	0	0	0	0	0	0	0	0	0	0	0	0	0	29.9087	R	0	0	0.111111	0	0	0	0	0	0	0	0	0	6	1.5
E8205305F3	86	Female	9.02222	0	0	0	11	11	11	0	0	0	11.8929	2.25	2.33333	1.33333	0	0	0	0	0	0	0	0	0	0	0	0	0	0	10.5	1.5	6.71045	R	0	0	0	0	0	0	0	0	0	0	0	0	0	0
683979E3ED	69	Male	6.35069	3.01875	31.7521	0	22	22	22	0	16.4	3.4	23.4643	2.89286	14.5	2.5	0	0	2	0	0	0	0	0	12	1	0	0	0	0	0	0	0	S	0	0	0.444444	0	0	0	0	0	0	0	0	0	0	0
084CCF3340	86	Male	9.48542	0	1.04028	0	9	16	16	0	9	4	0	0	6.5	2	7	2	0	0	0	0	5.35714	3.57143	0	0	0	0	0	0	0	0	10.3972	R	0	0	0.222222	0	0	0	0	0	0	0	0	0	23	3.5
054B148CE3	72	Male	15.4743	0	0	3	12	59	59	0	0	0	0	0	0	0	0	0	0	0	5	1	0	0	0	0	0	0	0	0	0	0	20.4142	R	0	0	0	0	0	18.75	1.25	0	0	0	17	2.5	0	0
95AB955A78	78	Male	24.4167	6.88403	14.6604	3	33	27	33	0	41.9	11.9	0	0	15.6667	2.66667	0	0	0	0	0	0	0	0	0	0	0	0	0	0	0	0	17.7605	R	0	0	0.166667	0	0	0	0	0	0	0	12	2	0	0
3D9FB5B53A	80	Male	28.8708	7.15278	13.2049	1	30	11	30	0	16	2	7.39286	1.60714	14.6667	3.91667	3	2	0	0	0	0	12.5	7.14286	0	0	0	0	0	0	0	0	20.8697	R	0	0	0.166667	0	0	0	0	0	0	0	0	0	13	5.5
2078E35E8E	85	Male	0	0	0	0	0	1	1	0	2	2	0	0	3.5	2	0	0	0	0	0	0	0	0	0	0	0	0	0	0	0	0	4.60955	R	0	0	0	0	0	0	0	0	0	0	0	0	0	0
AEEEAFB107	82	Male	77.4951	30.5326	30.5326	0	102	102	102	0	29.5	3.5	27.3214	3.21429	45.6667	2.16667	0	0	0	0	0	0	0	0	0	0	0	0	0	0	0	0	6.4752	R	0	0	0.916667	0	0	0	0	0	0	0	0	0	0	0
CFEF5804FB	88	Male	0	0	0	0	18	19	19	0	0	0	19.6071	1.28571	0	0	0	0	0	0	0	0	0	0	0	0	0	0	0	0	0	0	0	S	0	0	0	0	0	0	0	0	0	0	0	0	0	0
8DF3D76A6C	62	Male	0	0	0	1	22	5	7	0	0	0	6.10714	1.28571	0	0	0	0	0	0	0	0	0	0	0	0	0	0	0	0	0	0	11.9635	R	0	0	0	0	0	0	0	0	0	0	0	0	0	0
DCF574A179	86	Male	118.924	3.81736	6.79514	0	464	537	524	0	56.4	9.4	15.75	2.89286	68.6667	11.8333	5	2	6	0	0	0	55.3571	14.2857	0	0	0	0	0	0	0	0	72.7026	R	0	0	2.75	0	0	0	0	0	0	0	85.3333	14.0833	125	22.5
4D8ED93412	78	Male	5.47778	1.97917	1.97917	6	6	6	6	0	0	0	0	0	5.5	1	0	0	0	0	0	0	0	0	0	0	0	0	0	0	0	0	13.6964	R	0	0	0.166667	0	0	0	0	0	0	0	0	0	0	0
72327368EF	88	Male	79.5472	33.0653	33.0653	1	70	70	70	4.8	65	9	0	0	65.6667	5.66667	3	2	0	0	0	0	41.0714	3.57143	0	0	0	0	0	0	0	0	12.2082	R	0	0	0.25	0	0	0	0	0	0	0	23.3333	2.08333	2	2
83FF0D0A92	89	Male	1.87847	0	0	0	64	64	64	0	0	0	27.3214	3.21429	10.6667	1.16667	0	0	0	0	0	0	0	0	0	0	0	0	0	0	0	0	0	S	0	0	0.166667	0	0	0	0	0	0	0	7.91667	2.66667	0	0
D64975CC84	85	Male	9.93333	0	0	0	0	10	30	0	0	0	0	0	12.25	1.75	1	1	0	0	0	0	0	0	0	0	0	0	0	0	0	0	14.7665	R	0	0	0.277778	0	0	0	0	0	0	0	0	0	16.5	1.5
08B1DB5A12	80	Male	17.8653	0	0	1	49	55	63	0	0	0	0	0	15.8333	1.33333	0	0	1	0	0	0	5.35714	3.57143	0	0	0	0	0	0	0	0	46.7743	R	0	0	0.583333	0	0	0	0	0	0	0	41.1667	6.41667	0	0
FAEB0BE8EE	89	Female	0	0	0	0	0	24	37	0	0	0	0	0	5.16667	0.666667	8	2	0	0	0	0	0	0	0	0	0	0	0	0	0	0	21.9358	R	0	0	0	0	0	0	0	0	0	0	20.625	2.625	5	1
F22591852F	76	Female	0	1.36458	1.36458	0	19	3	36	0	3.4	2.4	0	0	2.5	1.5	0	0	0	0	0	0	0	0	0	0	0	0	0	0	2.5	1.5	0	S	0	0	0	0	0	0	0	0	0	0	0	0	0	0
12DE5F437B	82	Male	6.10903	4.88958	6.10625	0	15	6	17	0	12	3	0	0	4.16667	0.833333	0	0	0	0	0	0	0	0	0	0	0	0	0	0	8.5	2.5	0	S	0	0	0	0	0	0	0	0	0	0	0	0	3.5	2
6DB4C6AE72	64	Male	6.87986	0	0	1	21	13	15	2.4	0	0	0	0	0	0	1	1	0	0	0	0	0	0	0	0	0	0	0	0	0	0	0	S	0	0	0	0	0	0	0	0	0	0	0	0	21.5	2
B004FF2A9F	56	Male	0	0	0	1	26	3	26	0	0	0	4.17857	1.60714	0	0	0	0	0	0	0	0	0	0	0	0	0	0	0	0	0	0	0	S	0	0	0	0	0	0	0	0	0	0	0	0	0	0
7D65AAD662	89	Female	7.92847	0	0	1	0	23	23	0	0	0	0	0	0	0	10	2	0	0	0	0	0	0	0	0	0	0	0	0	0	0	0	S	0	0	0	0	0	0	0	0	0	0	18.5	3.5	9.5	1.5
4E15CBC0E4	91	Male	138.226	25.3917	94.3639	3	181	221	228	1.825	69.5	9	2.57143	1.60714	63.75	12.1667	13	4	0	0	0	0	60.7143	12.5	0	0	0	0	0	0	0	0	22.8827	R	0	0	11.5859	0	0	0	0	0	0	0	73.3333	8.33333	14	3.5
4424B8EED3	86	Male	0	0	0	0	4	4	4	0	0	0	3.85714	0.964286	1	1	0	0	0	0	0	0	0	0	0	0	0	0	0	0	0	0	0	S	0	0	0	0	0	0	0	0	0	0	0	0	0	0
AE2A1B65A8	85	Male	7.30278	3.85556	3.85556	0	12	27	41	0	0	0	10.6071	0.964286	14.3333	2.08333	0	0	7	0	0	0	0	0	0	0	0	0	0	0	1.5	1.5	3.78405	R	0	0	0.333333	0	0	0	0	0	0	0	0	0	0	0
A7A619C3CF	86	Male	34.7604	12.9306	16.8451	1	53	25	75	0	25.9	6.4	14.7857	1.28571	14.8333	2	0	0	5.5	0	0	0	0	0	0	0	0	0	0	0	15	1	89.6239	S	0	0	0	0	0	0	0	0	0	0	0	0	0	0
7CC28D570E	66	Male	0	0	0	3	1	1	1	0	0	0	0	0	1.5	0.833333	0	0	0	0	0	0	5.35714	3.57143	0	0	0	0	0	0	0	0	2.6369	R	0	0	0	0	0	0	0	0	0	0	0	0	0	0
6756F3C222	82	Female	43.7319	4.00208	8.17292	1	27	48	48	0	15	3	6.42857	3.21429	17.1667	2.5	0	0	0	4.8	0	0	0	0	0	0	0	0	0	0	0	0	0	S	0	0	0.75	0	0	0	0	0	0	0	30.5	3.5	0	0
B84A13FC8B	80	Female	95.7347	2.96042	11.0139	1	413	371	554	11.4	97.7	16.2	2.89286	1.60714	67.5	14.3333	34	5	22	0	0	0	78.5714	10.7143	0	0	0	0	0	0	0	0	7.70375	S	0	0	0.555556	0	0	0	0	8	0.4	0	0	0	23.5	4
0FA53DCDC9	78	Male	27.7014	3.56111	3.56111	1	46	42	42	0	22.4	9.4	0	0	23.1667	2	0	0	0	0	0	0	0	0	0	0	0	0	0	0	5	3	25.9603	R	0	0	0.555556	0	0	0	0	0	0	0	16.5	3	0	0
3FD1F04475	84	Male	0	0	0	1	0	30	27	0	0	0	0	0	0	0	0	0	0	0	0	0	0	0	0	0	0	0	0	0	0	0	218.608	S	0	0	0	0	0	0	0	0	0	0	0	0	0	0
9AFEE7D484	36	Male	65.5229	13.0174	21.2271	2	14	49	49	1.2	20	4	0	0	22.0833	4.08333	6	2	0	15.0667	0	0	12.5	3.57143	0	0	0	0	0	0	0	0	3.75124	R	0	0	0.638889	0	0	0	0	0	0	0	33.5	7	0	0
44E78462FA	80	Female	83.7889	21.6611	25.7826	0	44	70	0	0	21	6	14.4643	0.964286	42.75	6.75	0	0	5	0	0	0	83.9286	8.92857	0	0	0	0	0	0	0	0	0	S	0	0	1.11111	0	0	0	0	0	0	0	0	0	21.5	3.5
CD29A944EE	86	Male	66.3576	24.5507	35.1882	2	82	78	82	0	61.4	18.4	0	0	48.4167	8.66667	6	2	8	0	0	0	33.9286	12.5	0	0	0	0	0	0	8.5	2.5	85.4746	S	0	0	1.22222	0	0	0	0	0	0	0	19.1667	2.91667	44.25	10.5
30B25BB20E	72	Male	12.9972	0	10.9569	1	10	16	16	0	38	8	0	0	4.75	2.25	7	4	0	0	0	0	3.57143	1.78571	0	0	0	0	0	0	11.5	2.5	5.51704	R	0	0	0.527778	0	0	3.5	1.5	0	0	0	2.91667	1.66667	18.25	1.75
4E4253B80D	83	Male	16.8104	0	0	1	26	0	0	0	0	0	18.6429	2.25	2.5	0.5	0	0	0	0	0	0	0	0	0	0	0	0	0	0	0	0	0	S	0	0	0	0	0	0	0	0	0	0	0	0	0	0
F0DE846B84	38	Male	15.5833	1.99306	4.73889	0	15	9	11	0	16.4	2.4	0	0	6.83333	2.83333	0	0	0	0	0	0	0	0	0	0	0	0	0	0	9	3	0	S	0	0	0	0	0	0	0	0	0	0	0	0	14	2
824CCF918C	78	Female	16.6153	0	1.80208	0	28	0	0	0	29.9	6.9	18.6429	1.28571	7.16667	0.666667	6	2	0	0	0	0	0	0	0	0	0	0	0	0	0	0	27.7251	S	0	0	0.166667	0	0	0	0	0	0	0	3.75	1.25	0	0
30AC90F20A	61	Male	0	0	0	1	7	1	15	0	0	0	0	0	0	0	0	0	0	0	0	0	0	0	0	0	0	0	0	0	0	0	0	S	0	0	0	0	0	0	0	0	0	0	0	0	0	0
7D4784B492	55	Female	0	0	0	0	20	4	15	0	0	0	13.5	1.92857	0	0	0	0	0	0	0	0	0	0	0	0	0	0	0	0	0	0	0	S	0	0	0	0	0	0	0	0	0	0	0	0	0	0
F047BC1DA6	92	Male	35.8174	0	17.8354	3	33	72	73	0	43.9	9.9	39.8571	3.21429	18	4	0	0	2	0	0	0	10.7143	3.57143	0	0	0	0	0	0	0	0	5.57193	R	0	0	0.333333	0	0	0	0	0	0	0	0	0	6.5	2
1BF1B55D43	55	Male	0	0	1.00694	2	0	2	2	0	4.4	2.4	0	0	1.5	1.5	5	3	0	0	0	0	0	0	0	0	0	0	0	0	0	0	0	S	0	0	0	0	0	0	0	0	0	0	0	0	6.5	3.5
1126DF07FE	101	Female	64.2806	6.96875	21.9319	2	50	55	56	0	0	0	7.07143	1.28571	9.83333	1.33333	10	3	1.5	0	0	0	66.0714	14.2857	0	0	0	0	0	0	0	0	26.8978	S	0	0	1.51515	0	0	0	0	0	0	0	17.75	5	44.5	5.5
883E03D146	76	Male	0	0	0	1	0	14	19	0	0	0	0	0	17.5	1.5	0	0	0	0	0	0	0	0	0	0	0	0	0	0	0	0	0	S	0	0	0	0	0	0	0	0	0	0	0	0	8.5	2.5
23351C97C2	82	Female	170.561	15.9653	83.6319	0	410	469	471	4.8	72.9	17.9	3.21429	1.28571	39.5833	7.41667	22	8	15.5	0	0	0	112.5	21.4286	0	0	0	0	0	0	2.5	1.5	19.4259	R	0	1.5	1.94444	0	0	0	0	0	0	0	146.583	18.0833	2	2
3D069FF28C	66	Male	14.6639	0	0	0	18	21	21	0	0	0	7.07143	1.28571	20.8333	3.83333	16.6667	2.08333	0	0	0	0	0	0	0	0	0	0	0	0	0	0	9.6258	S	0	0	0.25	0	0	0	0	0	0	0	0	0	0	0
5D3C96E75E	69	Male	5.95833	0	18.4021	0	0	17	17	0	19.4	2.4	0	0	6.5	2	0	0	3	0	0	0	0	0	0	0	0	0	0	0	0	0	10.9011	R	0	0	0.444444	0	0	0	0	0	0	0	0	0	18.5	2
95046A5AC5	87	Female	149.106	54.5764	64.4333	0	125	261	261	6	36	4	5.15	2.9	93.75	16.5	32	10	10	0	0	0	17.8571	7.14286	0	0	0	0	0	0	65	9	6.92333	R	0	2	3.94444	0	0	0	0	0	0	0	122.208	22.9583	0	0
2080B77A41	66	Male	5.79792	0	0	32	20	10	10	0	0	0	0	0	5.66667	0.666667	0	0	0	0	0	0	0	0	0	0	0	0	0	0	0	0	15.7348	R	0	0	0.222222	0	0	0	0	0	0	0	0	0	0	0
69E5563272	86	Male	14.1722	6.33542	15.1687	4	16	10	10	2.4	17.4	6.4	0	0	7.33333	1.33333	5	1	0	0	0	0	0	0	0	0	0	0	0	0	7.5	1.5	10.8821	R	0	0	0.166667	0	0	0	0	0	0	0	6.66667	1.66667	0	0
0E7A66ACD0	82	Male	8.2875	8.22153	8.22153	1	9	9	9	0	13.4	4.4	0	0	14.5	5.5	0	0	2	0	0	0	0	0	0	0	0	0	0	0	0	0	6.182	R	0	0	0	0	0	0	0	0	0	0	0	0	0	0
2E17EB4328	76	Female	9.19167	0	0	2	6	15	21	0	0	0	0	0	0	0	12	2	0	0	0	0	0	0	0	0	0	0	0	0	0	0	16.2498	R	0	0	0	0	0	0	0	0	0	0	0	0	27.5	3.5
8054D00537	34	Male	44.7722	1.76319	35.6757	0	24	27	26	0	45.6	9.8	4.17857	1.60714	3	1	0	0	0	0	0	0	16.0714	3.57143	0	0	0	0	0	0	0	0	25.187	R	0	0	1.33333	0	0	0	0	0	0	0	0	0	38.5	5.5
BF088A4270	89	Male	106.265	11.0299	50.1201	0	159	165	138	0	74.8	16.8	14.7857	2.25	23.6667	3.66667	16.6667	2.08333	3	0	0	0	0	0	0	0	0	0	0	0	0	0	16.9311	R	0	0	1.30556	0	0	0	0	0	0	0	114.167	9.16667	0	0
74BBF2DCD2	52	Female	13.0333	0	0	2	39	59	60	0	0	0	6.58929	0.964286	0	0	8	1	0	0	0	0	0	0	0	0	0	0	0	0	0	0	52.6838	S	0	0	0	0	0	0	0	0	0	0	0	0	51	11
D66F0A199E	92	Female	4.80556	0	0	0	0	60	60	0	7.4	2.4	22.5	3.21429	0	0	0	0	0	0	0	0	0	0	0	0	0	0	0	0	0	0	0	S	0	0	0	0	0	0	0	0	0	0	0	0	19.5	1.5
46A28795E4	85	Female	0	0	0	1	7	11	12	0	0	0	0	0	0	0	0	0	0	0	0	0	0	0	0	0	0	0	0	0	0	0	0	S	0	0	0	0	0	7.5	1.5	0	0	0	0	0	6.5	1.5
D762D1528A	80	Female	0	0	0	0	13	13	13	0	0	0	0	0	0	0	0	0	0	0	0	0	0	0	0	0	0	0	0	0	6	1	0	S	0	0	0	0	0	4.75	0.75	0	0	0	0	0	0	0
B7F32FC700	85	Male	4.85833	0	0	2	11	12	12	0	0	0	2.25	1.28571	15	6	0	0	0	0	0	0	0	0	0	0	0	0	0	0	6.5	1.5	13.6697	R	0	0	0	0	0	0	0	0	0	0	0	0	6	1
5A1ECFE3FE	80	Male	1.94583	0	0	0	9	11	11	0	0	0	0	0	8.83333	1.5	0	0	0	0	0	0	0	0	0	0	0	0	0	0	0	0	0	S	0	0	0	0	0	0	0	0	0	0	0	0	0	0
A20FADBF61	77	Female	136.826	0	10.0111	2	285	308	308	1.8	31	4	0	0	33.8333	3.33333	0	0	3.5	0	0	0	0	0	0	0	0	0	0	0	0	0	26.7172	R	0	0	1.69444	0	0	0	0	0	0	0	156.75	11	66.5	6.5
DEF40B8D80	78	Female	1.01042	0	0	1	4	1	3	0	6.8	4.8	0	0	6.5	3.5	0	0	0	0	0	0	0	0	0	0	0	0	0	0	0	0	4.85906	R	0	0	0	0	0	0	0	0	0	0	0	0	0	0
EAC7D2A477	72	Male	1.18542	0	0	1	7	2	5	0	0	0	0	0	2.16667	0.833333	3	2	1	0	0	0	0	0	0	0	0	0	0	0	0	0	0	S	0	0	0	0	0	0	0	0	0	0	0	0	0	0
F1F3680967	80	Male	14.0028	0	0	0	0	0	0	0	12	4	9	1.28571	28.25	3.5	0	0	1.5	0	0	0	0	0	0	0	0	0	0	0	0	0	63.8117	R	0	0	0	0	0	0	0	0	0	0	0	0	10.5	1.5
A5E45862E4	50	Female	6.71667	0	0	0	7	7	7	0	0	0	0	0	9.33333	2.33333	0	0	5	0	0	0	0	0	0	0	0	0	0	0	0	0	3.85292	R	0	0	0	0	0	0	0	0	0	0	0	0	0	0
65D473FB10	52	Male	0	0	0	0	18	5	13	0	0	0	0	0	17	2	0	0	0	0	0	0	0	0	0	0	0	0	0	0	0	0	0	S	0	0	0	0	0	0	0	0	0	0	0	0	0	0
37C1EF475E	78	Female	2.62292	1.08056	1.08056	0	6	9	9	0	4.8	4.8	0	0	2.25	0.75	0	0	1.5	0	0	0	0	0	0	0	0	0	0	0	2.5	1.5	10.7085	R	0	0	0.25	0	0	0	0	0	0	0	0	0	13.25	4.25
39C703D181	93	Male	88.2812	10.9118	19.9222	0	729	48	730	0	34.8	7.8	19.9286	2.57143	72.25	9.25	11	3	0	0	0	0	0	0	0	0	0	0	0	0	62	13.5	4.31628	R	0	1.125	0.277778	0	0	0	0	0	0	0	301.125	51.875	133.5	23.5
1537DF3ACE	101	Male	95.8354	34.3118	48.4535	1	488	574	332	0	45.2	8.2	34.3929	5.46429	111.833	16.6667	0	0	0	0	7.66667	1	51.7857	5.35714	0	0	0	0	0	0	16.5	4.5	10.9656	R	0	0	0.416667	0	0	0	0	0	0	0	41.6667	5.41667	2.5	2.5
AC20421159	80	Female	72.4444	0	15.8264	1	68	53	53	0	43.4	5.4	5.78571	0.964286	1.66667	0.333333	35	5.5	0	0	0	0	0	0	0	0	0	0	0	0	17	3	888.985	S	0	0	0.222222	0	0	0	0	0	0	0	11.25	0.75	16.75	4.25
6567D518E4	91	Female	46.0111	23.6493	42.9042	0	44	51	57	0.538983	42.2	12.2	0	0	18.9167	4.91667	22	6	0	0	0	0	0	0	0	0	0	0	0	0	25	6	14.9169	R	0	0	0.833333	0	0	0	0	0	0	0	25.25	6.5	9.5	2
123F98BE18	95	Female	4.26458	1.32778	1.32778	0	17	17	17	0	5	1	0	0	2.5	0.5	0	0	0	0	0	0	0	0	0	0	0	0	0	0	2	1	4.32236	R	0	0	0	0	0	0	0	0	0	0	0	0	0	0
8C5419049C	92	Male	13.2938	4.80833	10.7313	3	12	5	0	0	19.9	7.9	0	0	5.33333	0.833333	0	0	0	0	0	0	0	0	0	0	0	0	0	0	3.5	1.5	13.7295	R	0	0	0.111111	0	0	0	0	0	0	0	3.75	1.5	0	0
E6C794EC39	91	Male	169.974	53.7139	62.7479	0	134	189	10	0.333333	106.9	16.9	0	0	61.4167	7.41667	28	5	3	76.5	0	0	0	0	0	0	0	0	0	0	26	4	4.32909	R	0	1.125	0.555556	0	0	0	0	0	0	0	27	3.75	110	9.5
277A406372	95	Male	39.1965	3.81944	10.6597	0	49	50	50	0	47.4	5.4	0	0	9.33333	1.33333	0	0	0	0	0	0	0	0	0	0	0	0	0	0	8.5	1.5	3.89907	R	0	0	0	0	0	0	0	0	0	0	42.0833	5.83333	10.5	2.5
833A4F5778	86	Male	0	0	0	0	0	0	125	0	0	0	0	0	0	0	0	0	0	0	0	0	0	0	0	0	0	0	0	0	0	0	4.32769	R	0	0	0	0	0	0	0	0	0	0	0	0	0	0
9D7762EA3E	84	Female	0	0	0	0	27	6	20	0	0	0	0	0	0	0	0	0	0	0	0	0	0	0	0	0	0	0	0	0	0	0	0	S	0	0	0	0	0	0	0	0	0	0	0	0	12.5	2
F7375741D4	95	Female	43.7965	4.22708	15.2653	0	88	21	88	0	70	15	0	0	21.1667	2.66667	25.6667	6.08333	0	0	0	0	21.4286	5.35714	0	0	0	0	0	0	2.5	1.5	0	S	0	0	0.388889	0	0	0	0	0	0	0	7.5	2.5	48	6.5
8F223DAFAF	82	Male	25.6285	5.00833	8.96597	6	149	82	101	2.4	0	0	0	0	30.3333	7.16667	8	2	1.5	0	0	0	0	0	0	0	0	0	0	0	33	7	3.71307	R	0	0	0.305556	0	0	0	0	0	0	0	46.9167	6.16667	44.75	5.75
06C08F0E4D	89	Female	2.09097	0	0	1	4	2	4	0	1.5	0.5	0	0	0	0	0	0	0	0	0	0	0	0	0	0	0	0	0	0	2	1	5.85398	R	0	0	0	0	0	0	0	0	0	0	0	0	6.5	3.5
066F583A49	93	Male	54.1813	9.74375	48.9819	1	46	53	0	0	48.4	7.4	21.8571	2.57143	5.66667	0.666667	17.6667	3.08333	0	0	0	0	53.5714	10.7143	0	0	0	0	0	0	19.5	6.5	121.93	S	0	0	0.5	0	0	0	0	0	0	0	26.6667	1.66667	24.5	5.5
EBA0A345DE	90	Male	22.7382	2.65972	14.5965	0	31	34	34	0	14.4	4.4	0	0	14	2.75	4	2	4	8	0	0	0	0	0	0	0	0	0	0	11.5	2	28.9897	R	0	0	0.444444	0	0	0	0	0	0	0	0	0	15	3
6D4B461FB8	93	Male	95.009	12.9736	48.4	0	76	324	0	0	0	0	15.75	2.25	31.4167	2.91667	0	0	0	0	0	0	0	0	4	1	0	0	0	0	25	2	1190.6	S	0	1	1	0	0	4.75	1.25	0	0	0	66.6733	3.54333	0	0
D3C40C19CA	93	Female	0	0	0	1	28	1	28	0	0	0	0	0	0	0	0	0	0	0	0	0	0	0	0	0	0	0	0	0	0	0	0	S	0	0	0	0	0	0	0	0	0	0	0	0	0	0
F72CBACA5E	94	Male	16.5132	8.02431	8.02431	0	31	92	0	0	35.9	8.4	32.1429	6.10714	18.25	2.5	0	0	0	0	0	0	0	0	0	0	0	0	0	0	0	0	5.59951	R	0	0	0	0	0	0	0	0	0	0	12	1.5	0	0
91CD21AB7E	54	Female	13.6701	0	0	0	13	28	35	0	0	0	0	0	0	0	0	0	0	0	0	0	0	0	0	0	0	0	0	0	16.5	2.5	0	S	0	0	0	0	0	0	0	0	0	0	16	2.5	24.5	3.5
43D368214F	83	Female	0	0	0	0	0	0	23	0	0	0	0	0	0	0	0	0	0	0	0	0	0	0	0	0	0	0	0	0	0	0	0	S	0	0	0	0	0	0	0	0	0	0	0	0	0	0
F5A50F63BD	92	Male	29.6153	0	0	0	0	0	65	2.4	0	0	0	0	16	3.25	0	0	0	0	0	0	0	0	0	0	0	0	0	0	26	5	4.32034	R	0	0	0	0	0	0	0	0	0	0	1.5	1.5	46	5.5
142142BAFA	96	Male	269.061	11.4674	258.35	2	239	311	311	0.225	196.325	35.325	56.5714	6.42857	18.8333	3.91667	0	0	0	0	0	0	51.7857	8.92857	0	0	0	0	0	0	30	6	29.9527	R	0	0	7.17172	0	0	0	0	0	0	4	248.333	18.75	0	0
8B4C3DD027	88	Female	12.3701	0	4.21667	0	15	15	15	0	0	0	0	0	0	0	0	0	2	0	0	0	0	0	0	0	0	0	0	0	0	0	2.33663	R	0	0	0.111111	0	0	0	0	0	0	0	23.25	7.5	14	3
AEDA134038	86	Male	112.803	21.0764	32.3361	1	182	1142	436	0	23.3	7.3	40.5	7.71429	46.5833	8.16667	59	12	5	0	0	0	0	0	0	0	0	0	0	0	73	16	25.9308	R	0	0.75	1.27778	0	0	0	0	0	0	0	230.583	46.3333	126.5	23
EEB13259EA	94	Male	30.7389	0	14.0007	0	28	28	28	0	18.5	3	0	0	6	1	1	1	5.5	11	0	0	0	0	0	0	0	0	0	0	12	3	21.9506	S	0	0	0	0	0	0	0	0	0	0	0	0	44	11
0B7D9A88B2	82	Male	0	0	0	0	69	0	469	0	0	0	0	0	0	0	0	0	0	0	0	0	0	0	0	0	0	0	0	0	0	0	167.317	S	0	0	0	0	0	0	0	0	0	0	0	0	27.5	3.5
C683A36786	91	Male	0	0	0	0	32	0	32	0	0	0	0	0	0	0	0	0	0	0	0	0	0	0	0	0	0	0	0	0	0	0	21.7679	R	0	0	0	0	0	0	0	0	0	0	0	0	23.5	2.5
33AB837BEA	92	Male	9.28194	6.36944	6.36944	0	15	4	15	0.666667	0	0	6.75	2.57143	6.75	1.5	5	2	3	0	0	0	0	0	0	0	0	0	0	0	0	0	1473.35	R	0	0	0.166667	0	0	0	0	0	0	0	0	0	0	0
15291F4BAC	88	Male	85.7076	0	15.8687	0	668	0	0	0	35.4	3.4	55.2857	8.03571	9.16667	3.66667	0	0	2	0	0	0	20.5357	6.25	7	2	0	0	0	0	26	4	1245.34	S	0	0	0.222222	0	0	21	3	0	0	0	39.3333	10.1667	81.5	15.5
CA36683A1F	98	Female	0	0	0	0	6	6	6	0	0	0	0	0	4	1.5	0	0	0	0	0	0	0	0	0	0	0	0	0	0	0	0	5.49578	R	0	0	0.222222	0	0	0	0	0	0	0	4.5	1.5	0	0
7518364326	91	Male	56.7646	0	0	0	157	0	133	0	0	0	0	0	16.25	2.75	66	13	0	0	0	0	0	0	0	0	0	0	0	0	0	0	0	S	0	4.6875	0	0	0	0	0	0	0	0	30	3	0	0
674A4F675A	92	Female	51.8368	0	3.95625	0	117	0	599	0	6.4	2.4	28.9286	5.78571	40.5833	6	105	25	0	0	0	0	0	0	0	0	0	0	0	0	61	9	4.32844	R	0	0	0.194444	0	0	33	6	0	0	0	264	40.5	50.75	7.75
984163B56C	96	Male	45.3778	10.4882	12.3764	1	158	2	13	1.33333	0	0	0	0	28.4167	5	8.5	2.5	0	0	0	0	7.14286	3.57143	0	0	0	0	0	0	44.5	11.5	52.9234	R	0	0	0.222222	0	0	0	0	0	0	0	74.9167	13.4167	2.25	1.25
668AEF7EAE	96	Female	19.7806	0	0	1	72	66	65	0	6.4	3.4	1.92857	0.964286	18.25	1.91667	0	0	0	0	0	0	0	0	0	0	0	0	0	0	15.5	2.5	12.0742	R	0	0	0.333333	0	0	0	0	0	0	0	18.375	2.625	14.75	6.25
458D1DB777	89	Male	10.9736	4.71319	13.909	0	16	17	17	0	31.4	5.9	0	0	6.33333	1.33333	4	1	0	0	0	0	8.92857	5.35714	0	0	0	0	0	0	5	3	4.55131	R	0	0	0.5	0	0	0	0	0	0	0	15.8333	2.08333	16	7
C3F1A08A15	94	Male	13.1069	0	0	0	82	82	82	0	0	0	0	0	8.5	1.5	10	3	0	0	0	0	0	0	0	0	0	0	0	0	19	3	0	S	0	0	0	0	0	0	0	0	0	0	50.25	7.5	0	0
951EE62866	85	Female	2.77431	0	0	0	0	0	0	0	0	0	0	0	0	0	6	3	0	0	0	0	0	0	0	0	0	0	0	0	0	0	0	S	0	0	0	0	0	0	0	0	0	0	4	1.5	11.5	3
216778478D	97	Male	20.5222	6.01528	18.0826	0	12	12	0	0	18.9	3.3	0	0	4.66667	1.16667	0	0	0	0	0	0	0	0	0	0	0	0	0	0	3	2	6.88801	S	0	0	1.51515	0	0	0	0	0	0	0	7.91667	1.66667	0	0
04C4CE3CC9	90	Male	45.7535	1.1375	21.8785	0	57	58	64	0	39.8	7.8	27.9643	7.39286	3.33333	1.33333	19	4	2	0	0	0	0	0	0	0	0	0	0	0	29.5	3.5	305.764	R	0	0	0	0	0	0	0	0	0	0	21.75	5.08333	41.75	7.25
4A21A66649	90	Male	14.2514	0	0	3	16	16	23	0	0	0	9.96429	2.25	4.66667	0.666667	0	0	0	0	0	0	0	0	0	0	0	0	0	0	19.5	6.5	0	S	0	0	0	0	0	0	0	0	0	0	3	0.75	0	0
3436363D06	90	Female	33.8104	5.27014	7.55486	0	119	101	116	0	8	2	0	0	44.8333	4.83333	14	2	1.5	0	0	0	0	0	0	0	0	0	0	0	18	3	0	S	0	0	0.222222	0	0	0	0	0	0	0	21	3	0	0
69AC4467C3	44	Male	73.4326	1.90139	27.0368	0	74	76	76	0	32	4	25.0714	2.89286	37.75	4.25	16	4	6.5	0	0	0	0	0	0	0	0	0	0	0	33	5	11.5482	R	0	1.875	0	0	0	0	0	0	0	0	0	0	30	3
B40AD15ED6	91	Male	42.8924	23.6951	40.8792	0	37	46	0	0	31.8	7.8	6.75	0.964286	11.3333	2.33333	0	0	1.5	0	0	0	0	0	0	0	0	0	0	0	14.5	2.5	29.9641	R	0	0	1.5	0	0	0	0	0	0	0	8	2	23.5	5
53456011F1	93	Male	0	0	0	1	5	5	5	0	0	0	3.85714	1.28571	1.75	1	0	0	0	0	0	0	0	0	0	0	0	0	0	0	0	0	2.87147	R	0	0	0	0	0	0	0	0	0	0	0	0	0	0
23528D5505	93	Male	18.6542	0	20.4389	0	22	21	22	0	28	4.25	3.85714	0.964286	0	0	0	0	0	0	0	0	26.7857	3.57143	0	0	0	0	0	0	2.5	1.5	7.61887	R	0	0	0.166667	0	0	0	0	0	0	0	0	0	26	2
88B1635328	93	Female	198.705	7.92431	44.141	0	559	633	703	0	85.1	15.1	23.5045	2.29018	61.3333	8.5	0	0	2	0	0	0	0	0	0	0	0	0	0	0	127	20	25.8359	R	0	0	0.666667	0	0	0	0	0	0	0	167.68	25.3133	48.25	5.75
519ADFFD49	75	Male	193.092	6.66389	70.7368	1	199	4	34	0	145.7	25.7	0.964286	0.964286	14	4	0	0	1	75.5	0	0	0	0	17	5	0	0	0	0	0	0	4.34362	R	0	1.5	0.388889	0	0	2	1	0	0	0	122	18	194	19
B30B67F6FC	92	Male	4.97986	0	0	0	372	372	372	0	12.4	4.4	0	0	10.5	2.33333	14	5	0	0	0	0	0	0	0	0	0	0	0	0	6.5	1.5	4.33104	R	0	0	0.222222	0	0	0	0	0	0	0	0	0	2	2
A4452A4F91	89	Male	73.2299	15.6556	85.5708	0	42	38	42	2.15833	31.4	3.4	20.8929	3.53571	7.33333	1.33333	0	0	7	0	0	0	42.8571	7.14286	0	0	0	0	0	0	0	0	21.9356	R	0	0	0	0	0	0	0	0	0	0	0	0	20	2
8CA77EF56A	76	Male	13.1326	0	0	0	0	0	0	0	0	0	9.96429	1.28571	0	0	42	8	0	0	0	0	0	0	0	0	0	0	0	0	0	0	419.327	S	0	0	0	0	0	0	0	0	0	0	108.75	15.75	147.75	20.75
4ADA399DC3	93	Female	1.42431	1.2625	1.2625	1	18	3	2	0	0	0	0	0	3.25	1	0	0	0	0	0	0	0	0	0	0	0	0	0	0	3.5	1.5	18.8822	R	0	0	0.222222	0	0	0	0	0	0	0	0	0	0	0
70495AE097	72	Female	5.72917	1.73472	1.73472	0	9	8	9	0	10.9	4.4	0	0	9	1	0	0	0	0	0	0	0	0	0	0	0	0	0	0	0	0	0	S	0	0	0	0	0	0	0	0	0	0	0	0	0	0
F75E36358C	95	Male	0	0	0	0	74	74	74	0	0	0	0	0	7	0.5	10	2	0	0	0	0	0	0	0	0	0	0	0	0	0	0	3.1326	R	0	0	0	0	0	0	0	0	0	0	68.25	9.75	0	0
E48D4DA23A	90	Male	128.503	14.8646	94.2396	3	91	90	52	0.666667	62.4	12.4	7.07143	1.28571	24.3333	5.16667	0	0	0	0	0	0	0	0	0	0	0	0	0	0	28.5	5.5	47.6828	R	0	10.5	0.777778	0	0	0	0	0	0	0	121.667	20.4167	0	0
8F6017AB2D	93	Female	9.18819	0	0	2	11	0	11	0	0	0	0	0	4.66667	0.666667	0	0	0	0	0	0	0	0	0	0	0	0	0	0	10.5	1.5	12.9073	R	0	0	0.222222	0	0	0	0	0	0	5	2.91667	1.66667	3.5	2.5
2603BF8B28	91	Male	72.4493	12.5965	23.8063	0	327	588	603	0	45.8	8.8	117.643	19.6071	54.4167	13.4167	0	0	8.5	0	0	0	0	0	10	1	0	0	0	0	20.5	3.5	10.3256	R	0	0	0.666667	0	0	0	0	0	0	0	21	3	17	2
CE730258E0	79	Female	62.2083	0	4.71806	0	700	891	1042	5	0	0	18	2.57143	32.0833	3.75	91	16	0	0	0	0	0	0	7	2	0	0	0	0	61.5	7.5	4.33274	R	0	1.125	0	0	0	0	0	0	0	0	203.125	27.875	97.5	18
BC85948C24	95	Male	26.5778	9.47639	9.47639	0	17	16	16	0	13.2	3.1	0	0	13.75	1	0	0	2	0	0	0	0	0	0	0	0	0	0	0	13.5	1.5	12.6085	R	0	0	0	0	0	0	0	0	0	0	0	0	0	0
4D895673B2	86	Male	5.93194	0	4.62361	0	21	21	6	0	10.5	3	0	0	0	0	0	0	0	0	0	0	0	0	0	0	0	0	0	0	7.5	1.5	4.3417	R	0	0	0.333333	0	0	0	0	0	0	0	0	0	11	2
1702B47529	81	Male	13.9958	0	0	0	0	0	0	0	0	0	18.0714	3.28571	0	0	10	3	0	0	0	0	0	0	0	0	0	0	0	0	16	1	0	S	0	0	0	0	0	0	0	0	0	0	0	0	21.5	3.5
DDA7B04997	90	Female	46.2319	13.4243	29.966	0	12	49	49	0	27	5	0	0	13.9167	2.58333	25	6	5	0	0	0	0	0	0	0	0	0	0	0	11	2	23.3253	S	0	1.125	0.611111	0	0	0	0	0	0	0	12.75	2.25	21	4
801BF8A516	88	Male	127.867	8.05347	18.3833	2	261	329	388	7.2	56.8	8.8	0	0	47.5833	8.58333	13	2.5	0	0	0	0	0	0	0	0	29.5	5	0	0	94.5	15.5	11.6669	S	0	0	1.27778	0	0	0	0	0	0	20	84.0833	14.0417	30	5
11CC856EC3	85	Male	7.68264	0	0	1	8	8	8	0	0	0	0	0	4.75	0.75	10	2	0	0	0	0	0	0	0	0	0	0	0	0	0	0	6.88042	R	0	0	0	0	0	0	0	0	0	0	0	0	0	0
82E0E4946D	90	Female	35.8479	2.95486	19.7167	0	67	2	179	0	30.8	8.8	15.75	5.46429	20.375	4.25	3	2	0	4.8	0	0	5.35714	3.57143	0	0	0	0	0	0	13.5	2.5	72.7056	R	0	0	0.444444	0	0	0	0	0	0	0	4.5	3	26	6.5
0D1872AD93	98	Male	101.232	0	61.8354	0	66	380	322	0	45.4	7.4	5.46429	2.57143	80.1667	9.41667	0	0	0	0	0	0	0	0	0	0	0	0	0	0	81	13	33.6571	S	0	0	7.07071	24	5.33333	0	0	0	0	0	40.1667	4.91667	64	8.5
F54CC40C40	88	Male	66.0444	0	8.78333	1	75	423	423	0	20.8	4.8	86.4643	14.1429	49.1667	10.0833	8	3	8	7.2	0	0	0	0	0	0	0	0	0	0	27.5	4.5	11.5583	R	0	0	0.722222	0	0	0.5	0.5	0	0	0	25.5	5.25	1.5	1.5
07408EE7B3	95	Male	2.45556	0	2.97847	1	7	7	7	0	5.4	2.4	0	0	4.75	2.5	0	0	0	0	0	0	0	0	0	0	0	0	0	0	10.5	3.5	23.9264	R	0	0	0.222222	0	0	0	0	0	0	0	5.41667	2.08333	0	0
C4F3C646EB	86	Male	32.5076	0	8.93264	0	178	7	303	0	54	12	6.42857	1.60714	7.5	2	0	0	0	0	0	0	0	0	0	0	0	0	0	0	6.5	1.5	959.947	S	0	0	0	0	0	0	0	0	0	0	0	0	126.5	19
69B57E09C0	82	Female	227.83	14.6403	38.6257	0	472	544	812	1.6	45.7	11.2	8.67857	0.964286	79.8333	11.9167	107	19	4	7.2	0	0	7.14286	3.57143	23.6667	5.66667	0	0	0	0	130.5	19.5	279.979	S	0	3.66667	0.777778	0	0	4.125	0.625	0	0	0	471.5	71.5	195.5	24
165694DBF1	75	Male	2.34097	2.85	2.85	1	3	3	3	0	9.8	6.8	0	0	8.66667	2.66667	0	0	0	0	0	0	8.92857	5.35714	0	0	0	0	0	0	6.5	3.5	0	S	0	0	0.611111	0	0	0	0	2.4	1.2	0	0	0	1.5	1.5
812725F1D5	87	Female	54.4493	23.5674	51.6854	1	41	57	64	1.8	36.8	7.1	11.5714	0.964286	22.75	2.5	21	7	6.5	0	0	0	7.14286	3.57143	0	0	0	0	0	0	23.5	2.5	207.518	S	0	0	0.555556	0	0	7.5	3.5	2.4	0.8	0	1.75	0.75	53	12.5
C39CC98B2E	76	Male	0	0	0	9	23	4	0	0	0	0	0	0	2.16667	1	0	0	3	0	0	0	0	0	0	0	0	0	0	0	0	0	23.8885	R	0	0	0	0	0	0	0	0	0	0	3.75	2.25	0	0
15DB711A1F	81	Female	0	0	0	0	0	3	3	0	3	3	5.46429	1.60714	0	0	0	0	0	0	0	0	0	0	0	0	0	0	0	0	0	0	4.63172	R	0	0	0	0	0	0	0	0	0	0	0	0	0	0
F0CD5BCAE2	90	Male	24.6222	0	0	0	27	0	31	0	4	2	5.46429	1.60714	12.3333	1.83333	0	0	1.5	0	0	0	0	0	0	0	0	0	0	0	23.5	6.5	13.6116	R	0	0	0	0	0	0	0	0	0	0	0	0	12.5	2
7DB3D1E6F0	85	Female	30.5986	0	32.025	1	43	58	65	0	30.75	1.75	19.2857	4.82143	0	0	0	0	0	0	0	0	0	0	0	0	0	0	0	0	6.5	1.5	65.9935	R	0	0	0.166667	0	0	0	0	0	0	0	0	0	59	3.5
3904FE0AFB	93	Male	90.3632	1.07778	39.1431	0	90	90	90	3.6	34	4	36.6429	5.14286	6.83333	2.08333	21.5	3.5	0	0	0	0	0	0	0	0	0	0	0	0	44	9	14.4457	R	0	0	0.5	0	0	0	0	0	0	0	42.9167	6.04167	0	0
FB3D895E15	90	Male	16.5056	1.98194	9.01597	0	15	4	15	0	19.5	4	0	0	5.16667	1.16667	0	0	0	0	0	0	0	0	0	0	0	0	0	0	0	0	14.7294	R	0	0	0.333333	0	0	0	0	0	0	0	0	0	12.5	2
C2DBCDAE3C	86	Male	25.5278	9.88403	33.3993	0	30	32	32	0	46.9	11.9	0	0	9.16667	0.666667	0	0	0	5.5	0	0	16.0714	5.35714	0	0	0	0	0	0	0	0	24.7664	R	0	0	0.333333	0	0	0	0	0	0	10	14.1667	1.66667	12.5	5
A20FAFAAEA	91	Male	78.8188	23.7528	42.941	2	72	90	106	0	50.3	11.3	0	0	44.6667	5.66667	3	2	3	0	0	0	57.1429	12.5	0	0	0	0	0	0	0	0	20.5875	R	0	0	1	0	0	0	0	0	0	0	38.75	6.5	48.5	5
C7FBBB4E92	92	Female	0	0	0	0	108	33	4	0	0	0	8.35714	3.53571	1	1	0	0	0	0	0	0	0	0	0	0	0	0	0	0	0	0	0	S	0	0	0	0	0	0	0	0	0	0	2	2	0	0
4296E62678	86	Male	26.0521	26.2799	27.9486	2	15	41	51	0	26.8	8.8	1.28571	1.28571	29.8333	4.33333	0	0	0	0	0	0	48.2143	16.0714	0	0	0	0	0	0	3.5	1.5	29.8872	R	0	0	1.27778	0	0	0	0	0	0	0	0	0	19	4
C75EFAA0D1	94	Male	8.58264	5.74653	5.74653	1	65	6	30	0	7	1	0	0	5.33333	0.833333	0	0	0	0	0	0	0	0	0	0	0	0	0	0	11.5	2.5	8.59541	R	0	0	0	0	0	0	0	0	0	0	0	0	0	0
5817196547	87	Male	3.01111	1.20625	1.20625	0	25	3	25	0	0	0	0	0	3.25	1	0	0	0	0	0	0	0	0	0	0	0	0	0	0	0	0	26.9111	S	0	0	0.166667	0	0	0	0	0	0	0	0	0	0	0
B9050881F7	90	Male	59.1618	17.9708	31.6639	1	67	67	67	0	22.2	6.5	0	0	16.75	2.25	7	1.75	0	0	0	0	0	0	0	0	0	0	0	0	0	0	3.56407	R	0	0	0.944444	0	0	0	0	0	0	0	40.125	12.375	33	5.5
AB92BF1789	88	Female	36.1326	15.2465	15.2465	0	22	21	0	0	17.4	2.4	0	0	21.75	3.25	6	1	3	0	0	0	0	0	0	0	0	0	0	0	0	0	0	S	0	0	0.444444	0	0	0	0	0	0	0	0	0	0	0
C13E68B6CF	87	Male	35.3313	2.99514	16.9368	0	41	34	41	0	14	3	0	0	10.6667	2.16667	10	3	8	0	0	0	0	0	0	0	0	0	0	0	30.5	5.5	22.5181	R	0	0	0.277778	0	0	0	0	0	0	0	0	0	19.5	3
62C21C4E35	87	Female	17.1083	6.02639	6.02639	2	7	4	7	0	16.4	2.4	19.3259	3.89732	18.5	2.5	0	0	0	0	0	0	0	0	0	0	0	0	0	0	8.5	2	0	S	0	0	0	0	0	0	0	0	0	0	0	0	0	0
2DE0550DBB	87	Female	3.97292	0	3.03333	0	4	0	0	0	5	1	0	0	1.16667	1.16667	0	0	0	0	0	0	0	0	0	0	0	0	0	0	4.5	1.5	0	S	0	0	0	0	0	1.75	0.75	0	0	0	0	0	3.25	0.75
C25DCD1E11	90	Male	87.0118	0	26.1618	0	118	129	70	0	43.2	14.2	40.3393	8.03571	50.4167	11.8333	12	1	3.5	0	0	0	0	0	0	0	0	0	0	0	51.5	15.5	59.9706	R	0	0	1.38889	0	0	0	0	0	0	0	17	2	50	12.5
1E2DEA21F2	66	Male	11.0187	4.20833	4.20833	0	6	0	0	0	8.3	3.1	0	0	8.66667	2.66667	4	4	0	0	0	0	12.1429	3.03571	0	0	0	0	0	0	0	0	4.00044	R	0	0	0	0	0	0	0	0	0	0	0	0	0	0
F77E05A720	73	Female	64.7715	3.59097	18.8229	1	22	69	69	2.4	37.4	8.9	3.21429	1.28571	5.33333	1.33333	21	4	13	0	0	0	0	0	0	0	0	0	0	0	0	0	44.5359	S	0	0	0.305556	0	0	3.75	0.75	0	0	0	15	3	64.5	7.5
B869CDB480	89	Male	0	0	1.82639	0	10	1	1	0	3.4	2.4	0	0	0	0	0	0	3	0	0	0	0	0	0	0	0	0	0	0	0	0	11.9721	R	0	0	0.111111	0	0	0	0	0	0	0	0	0	0	0
8D27A0C981	88	Female	279.446	60.6278	159.485	0	551	513	588	0	183.257	31.8286	19.9286	3.53571	100.167	13.9167	47	11	0	0	0	0	13.3929	5.35714	0	0	35	6.5	0	0	84	18	18.97	R	0	0	6.65825	0	0	0	0	0	0	14	192.625	27.0417	18.75	3.25
425488B0FA	64	Female	39.9333	0	0	0	0	124	124	0.6	0	0	53.3571	6.10714	7.33333	0.833333	0	0	0	0	0	0	0	0	0	0	0	0	0	0	9.5	1.5	3.6202	R	0	1.875	0	0	0	0	0	0	0	0	0	0	0	0
956FAC6F62	90	Male	60.9368	6.94306	14.5028	1	67	16	123	0.6	38.4	7.4	0	0	12	2	9	2	0	0	0	0	0	0	0	0	0	0	0	0	14.5	2.5	214.639	R	0	0	0.611111	0	0	3	2	0	0	4.66667	9.58333	4.33333	105.5	9.5
7167C93924	94	Male	21.2417	10.0847	10.0847	3	8	11	0	0	16.5	4.5	0	0	13.5	2.5	0	0	0	0	0	0	0	0	0	0	0	0	0	0	15.5	5.5	1061.94	S	0	0	0.361111	0	0	0	0	0	0	0	14.5833	4.58333	14	3.5
0F60E19F65	94	Male	28.0007	0	0	0	232	212	0	0	0	0	0	0	18	4	0	0	0	0	0	0	0	0	0	0	0	0	0	0	23	3	25.892	R	0	0	0.757576	0	0	0	0	0	0	0	81.2917	9.54167	62.5	11
09C139DC87	95	Female	0	0	0	1	17	11	19	0	0	0	8.03571	1.60714	0	0	3	2	0	0	0	0	0	0	0	0	0	0	0	0	0	0	7.06873	R	0	0	0	0	0	1.5	1.5	0	0	0	0	0	0	0
24D9E921B2	92	Female	22.1694	8.15903	14.6576	0	45	34	34	0.6	6	1	0	0	19	1	0	0	0	0	0	0	0	0	0	0	0	0	0	0	12.5	2.5	26.9666	R	0	0	0.222222	0	0	0	0	0	0	0	33.1667	6.16667	0	0
C9884E2AAE	92	Male	8.54028	1.30625	1.30625	2	28	5	17	0	0	0	0	0	8.25	1.5	0	0	0	0	0	0	0	0	0	0	0	0	0	0	6	1	19.8812	R	0	0	0.277778	0	0	0	0	0	0	0	23.625	3.375	0	0
C438A8E046	94	Male	126.031	50.8153	99.2826	2	175	301	0	0.4	16.5	1	102.696	14.7857	65.5	9.16667	6	2	4	0	0	0	0	0	0	0	0	0	0	0	75	9	1065.87	S	0	1.5	2.12626	0	0	0	0	0	0	0	198.09	35.7533	50.5	9.5
1868D3A876	89	Male	40.85	7.13472	7.13472	1	19	13	17	0	16	2	26.6786	5.78571	15.5	2.75	17	2	2	0	0	0	0	0	0	0	0	0	0	0	32	6	35.6244	R	0	0.75	0.166667	0	0	0	0	0	0	0	0	0	18.75	2.25
04E1EA86B6	82	Male	41.2833	0	3.48056	1	85	168	79	0.2	0	0	18.9643	4.17857	4.16667	0.666667	15	3	0	0	0	0	0	0	0	0	0	0	0	0	76	9	5.67012	R	0	0	0	0	0	0	0	0	0	0	90.625	9.625	44.275	5.275
4E81A23936	93	Male	3.09861	0	2.80833	1	35	3	0	0	5	2	0	0	6.16667	0.833333	0	0	2	0	0	0	0	0	0	0	0	0	0	0	5.5	2.5	2.84559	R	0	0	0	0	0	0	0	0	0	0	43.8333	7.08333	0	0
CAB9BF5A59	84	Female	7.05694	1.08889	1.08889	2	10	11	0	0	13.4	8.4	7.07143	3.21429	4	1.75	0	0	0	0	0	0	0	0	0	0	0	0	0	0	8.5	3.5	7.60075	R	0	0	0.277778	0	0	0	0	0	0	0	0	0	8	2
5073822ABB	67	Female	72.3958	9.04722	9.04722	1	70	360	366	0	14	2	27.3616	6.14732	19.6667	2.33333	50	14	9.5	0	0	0	0	0	0	0	0	0	34.5	0.75	39	6	49.6827	R	0	0	0	0	0	0	0	0	0	0	15.75	2.75	119.75	15.75
F8A3D6C13A	90	Male	8.02292	0	0	2	0	0	15	0	0	0	0	0	0	0	0	0	0	0	0	0	0	0	0	0	0	0	0	0	10.5	2.5	3.48068	R	0	0	0	0	0	0	0	0	0	0	0	0	26	2
F98E8A37D8	85	Female	0	0	0	0	3	3	3	0	0	0	0	0	2.16667	0.666667	0	0	0	0	0	0	0	0	0	0	0	0	0	0	0	0	4.73057	R	0	0	0	0	0	0	0	0	0	0	0	0	0	0
64D1984F0C	87	Female	0	0	1.90139	6	2	2	2	0	3	1	0	0	0	0	0	0	0	0	0	0	0	0	0	0	0	0	0	0	3	1	2.78399	R	0	0	0	0	0	0	0	0	0	0	0	0	5	2
5F4B7FD067	84	Female	25.4201	0	4.01111	0	24	24	24	0	14.4	4.4	2.25	1.28571	10.75	1.75	0	0	0	0	0	0	0	0	0	0	0	0	0	0	2.5	1.5	15.7036	R	0	0	0.166667	0	0	0	0	0	0	0	25.125	4.125	0	0
AF286AA030	98	Male	105.905	12.0535	24.7785	0	385	485	610	0	55.3	14.3	11.25	2.57143	81.0417	15.875	40	13	9	0	0	0	0	0	1	1	0	0	0	0	37	8	115.113	R	0	0.75	1	0	0	0	0	0	0	0	190.5	27.4167	157.75	27.25
CEEDC1594A	76	Female	40.6472	0	19.8437	3	26	27	48	0	23.4	3.4	0	0	12	0.666667	0	0	0	0	0	0	39.2857	5.35714	0	0	0	0	0	0	0	0	15.6803	R	0	0	0.555556	0	0	0	0	0	0	0	19.5	2.5	18.5	5
99DD29D8D6	74	Female	0	0	0	2	5	2	2	0	0	0	0	0	0	0	0	0	0	0	0	0	0	0	0	0	0	0	0	0	0	0	10.6983	R	0	0	0	0	0	0	0	0	0	0	0	0	5.5	2.5
348560CBED	47	Male	7.18194	0	0	1	22	35	35	0	0	0	20.8929	2.57143	8.33333	1.33333	0	0	0	0	0	0	17.8571	3.57143	0	0	0	0	0	0	0	0	18.5249	R	0	0	0.166667	0	0	0	0	0	0	0	1.25	0.75	0	0
4BFE5E47BD	77	Male	2.9875	10.8694	10.8694	0	15	15	15	0	13.5	2.5	0	0	13.75	3.41667	5	2	0	0	0	0	0	0	0	0	0	0	0	0	0	0	6.99186	R	0	0	0	0	0	0	0	0	0	0	0	0	0	0
0D530578C7	96	Female	105.396	9.00278	21.9479	1	66	235	260	0	23.4	2.4	45.3214	3.85714	25.3333	3.20833	6	2	2.5	0	0	0	0	0	0	0	0	0	0	0	47.5	9.5	40.893	R	0	0	0.333333	0	0	0	0	0	0	0	24.125	3.375	87.5	11
E375DF58AB	83	Female	48.3951	6.49792	13.4021	2	55	72	72	0	36.4	13.4	11.8929	1.60714	27.3333	4.33333	0	0	6	0	0	0	0	0	0	0	0	0	0	0	0	0	12.8902	R	0	0	0.805556	0	0	4.5	1.5	0	0	0	27.5	3.5	29.5	4
845604E8F3	95	Male	46.2674	10.8861	11.9785	1	47	37	36	0	4.4	2.4	8.03571	3.21429	14.0833	2.75	0	0	0	0	0	0	0	0	0	0	0	0	0	0	0	0	37.8859	S	0	0	2.18687	0	0	0	0	0	0	0	0	0	15	1.5
91964EFDDB	91	Male	7.43333	0	0	2	8	18	11	0	0	0	11.8929	1.28571	1	0.5	0	0	0	0	0	0	0	0	0	0	0	0	0	0	0	0	489.757	R	0	0	0	0	0	0	0	0	0	0	0	0	14	5
CAAEFBFD88	76	Male	18.1146	0	5.475	0	26	31	19	0	8.4	2.4	0	0	12	1.5	8	2	4	0	0	0	0	0	0	0	0	0	0	0	0	0	41.7664	R	0	0	0	0	0	0	0	0	0	0	0	0	22	2.5
3744BB98AB	79	Male	18.9507	4.13681	4.13681	1	19	19	19	0	8	5	0	0	11.75	3.16667	0	0	0	0	0	0	0	0	0	0	0	0	0	0	16	2	12.5676	R	0	0	0.222222	0	0	0	0	0	0	0	9	3	0	0
E86AF1CEA7	95	Male	11.6979	0	1.23819	1	12	0	0	0	13	1	0	0	0	0	15	2	0	0	0	0	0	0	0	0	0	0	0	0	2	1	11.9212	R	0	0	0	0	0	0	0	0	0	0	6.75	1.25	0	0
BB955E9E35	87	Male	22.9139	0	2.03681	0	13	151	151	0	13.4	4.4	6.10714	2.57143	20.1667	3.66667	0	0	4	0	0	0	26.7857	7.14286	0	0	0	0	0	0	3.5	1.5	106.585	R	0	0	0.444444	0	0	0	0	0	0	0	1.75	0.75	36.5	3.5
2868B5C753	85	Female	10.841	0	4.81806	1	23	22	17	0	4.25	0.75	20.25	4.82143	17.8333	3.08333	7	2	0	0	0	0	0	0	0	0	0	0	0	0	8.5	2.5	335.753	R	0	0	0	0	0	0	0	0	0	0	0	0	10	2
27E6D6FD38	69	Male	58.859	0	0	0	195	189	214	0	0	0	74.8929	8.35714	9.83333	1.33333	0	0	0	0	0	0	0	0	0	0	0	0	0	0	42	3	11.836	R	0	0	0.444444	0	0	0	0	0	0	0	0	0	46	4
99A6DDEC60	84	Male	18.6403	1.02222	3.88194	0	16	15	12	2.4	6	1	0	0	13.5	3.75	0	0	0	0	0	0	0	0	0	0	0	0	0	0	9.5	1.5	0	S	0	0	0	0	0	0	0	0	0	0	13.3333	2.08333	0	0
2163ACBA8D	86	Male	71.9993	0	3.77708	0	92	135	91	0	0	0	54.3214	7.07143	10.5	1.75	22	5	0	0	0	0	0	0	0	0	0	0	0	0	58	9	113.692	S	0	0	0.277778	0	0	0	0	0	0	0	103.125	12.625	50.5	7
DC6AB99AC1	91	Male	10.4944	0	0	1	13	0	0	0	0	0	0	0	10.75	1	0	0	0	0	0	0	0	0	0	0	0	0	0	0	12.5	1.5	10.4763	S	0	0	0	0	0	0	0	0	0	0	0	0	0	0
4C543E9C7C	74	Male	37.5403	0	4.80694	0	27	68	78	0	40.4	5.4	0	0	5.16667	1.66667	7	1	0	0	0	0	0	0	8	3	0	0	0	0	17	4	51.8475	R	0	0	0	0	0	0	0	0	0	0	0	0	51.75	8.25
A01384AE96	82	Male	33.1833	0	0	0	13	38	37	1.8	0	0	23.7857	3.53571	20.75	3.25	32	8	0	0	0	0	0	0	0	0	0	0	0	0	40.5	8.5	27.8727	S	0	0	0	0	0	0	0	0	0	0	0	0	39	6
2B60032FFA	84	Male	97.2674	45.534	71.4312	0	88	94	100	12	81.4	17.9	84.8571	7.71429	74.6667	9.66667	0	0	14	0	0	0	51.7857	12.5	0	0	0	0	0	0	0	0	49.4293	R	0	0	0.277778	0	0	0	0	0	0	0	0	0	0	0
9E8432507C	49	Female	9.42986	0	0	2	24	21	24	0	3.4	2.4	8.03571	1.28571	5.5	1.5	0	0	0	0	0	0	0	0	0	0	0	0	0	0	13.5	3.5	4.51765	R	0	0	0	0	0	0	0	0	0	0	18.3333	3.33333	0	0
833AF5A39A	83	Female	0	0	0	1	0	9	13	0	0	0	0	0	0	0	0	0	0	0	0	0	0	0	0	0	0	0	0	0	0	0	0	S	0	0	0	0	0	2.5	1.5	0	0	0	0	0	14	2
56D27A5815	89	Male	21.6472	5.86806	7.84653	0	2	9	18	0	28	5	0	0	11.8333	2.83333	0	0	0	0	0	0	0	0	0	0	0	0	0	0	13	2	0	S	0	0	0.361111	0	0	0	0	0	0	0	0	0	5	2
D5A5198C26	85	Female	63.659	5.83472	12.8076	0	43	14	38	0	122	14	0	0	9.83333	1.33333	0	0	0	0	0	0	0	0	0	0	0	0	0	0	10	1	30.6014	R	0	0	0	0	0	0	0	0	0	0	65	8	27	4.5
CB82D607F6	83	Male	20.6056	7.45069	7.45069	0	20	41	41	0	0	0	0	0	23.3333	3.5	0	0	0	0	0	0	33.9286	8.92857	0	0	0	0	0	0	0	0	3.57744	R	0	0	0.305556	0	0	0	0	0	0	0	20.4167	2.5	0	0
DA3AE4F694	87	Male	34.0021	7.97153	18.9743	0	0	40	111	0.2	12	1.75	27.9643	6.42857	7.66667	0.666667	10	2	0	0	0	0	0	0	0	0	0	0	0	0	23.5	3.5	20.444	R	0	0	0	0	0	0	0	0	0	0	7.5	1.5	49.5	7
6AE79F6ECB	84	Male	121.877	6.99375	31.9326	0	397	430	307	0.6	22.4	2.4	82.9687	8.71875	53.6667	7	0	0	0	0	0	0	0	0	0	0	0	0	0	0	64	10	12.9879	R	0	0	3.97475	0	0	0	0	0	0	0	12.5	1.25	37	3.5
41CAE0A159	89	Male	160.849	23.3937	46.1236	1	157	173	88	0	45.8	6.8	9.64286	2.89286	27.5833	4.83333	37	7	4	0	0	0	0	0	0	0	0	0	0	0	37.5	5.5	49.4457	R	0	0	1.36111	0	0	0	0	0	0	0	160.75	22	0	0
AEF8CC570B	88	Male	8.97431	0	0	0	18	18	26	0	0	0	0	0	12.1667	0.666667	0	0	0	0	0	0	0	0	0	0	0	0	0	0	0	0	16.7962	R	0	0	0.222222	0	0	0	0	0	0	0	0	0	0	0
446ED7E9AC	88	Female	4.81111	0	0	1	29	29	29	0	0	0	9.96429	1.92857	12.75	1.75	0	0	0	0	0	0	0	0	0	0	0	0	0	0	6	1	39.8955	R	0	0	0	0	0	0	0	0	0	0	0	0	0	0
D525DD5C11	91	Male	5.67361	2.35556	4.55069	1	9	7	52	0	7	4	23.7857	3.53571	2.16667	0.666667	0	0	2	0	0	0	0	0	0	0	0	0	0	0	7	1	3.07421	R	0	0	0.222222	0	0	0	0	0	0	0	0	0	0	0
0B263956C3	56	Female	0	0	0	0	0	2	2	0	0	0	0	0	1.33333	1.33333	0	0	0	0	0	0	0	0	0	0	0	0	0	0	0	0	0	S	0	0	0	0	0	0	0	0	0	0	0	0	5.75	2.75
43A1D12412	75	Female	34.0347	0	0	2	59	59	77	0	0	0	51.75	2.89286	0	0	17	2	5	0	0	0	0	0	0	0	0	0	0	0	0	0	70.6997	R	0	0	0	0	0	0	0	0	0	0	0	0	24.5	2
381658ADEB	89	Female	6.89375	0	0	1	41	1	40	0	3	2	3.21429	1.28571	15	2	4	1	1.5	0	0	0	0	0	0	0	0	0	0	0	2.5	1.5	0	S	0	0	0	0	0	2.5	1.5	0	0	0	27.8333	9	0	0
EA325BF93E	64	Male	18.5139	11.9639	11.9639	0	18	17	18	0	22.5	3	7.07143	1.28571	14.6667	2.66667	0	0	0	0	0	0	0	0	0	0	0	0	0	0	19	1	20.8389	R	0	0	0	0	0	0	0	0	0	0	0	0	0	0
7B42A23697	91	Male	13.9278	2.47917	2.47917	0	20	21	21	0	0	0	9	1.28571	7.33333	1.33333	10	1	1.5	0	0	0	7.14286	3.57143	0	0	0	0	0	0	0	0	12.4324	R	0	0	0	0	0	0	0	0	0	0	0	0	0	0
20864DE0F9	79	Male	2.21667	0	0	2	2	0	0	0	2	2	0	0	0	0	0	0	0	0	0	0	0	0	0	0	0	0	0	0	0	0	0	S	0	0	0	0	0	0	0	0	0	0	14.25	9.75	0	0
D288F14332	87	Male	8.01042	0	0	0	30	7	188	0	0	0	0	0	26.5833	2.33333	16	5	0	0	0	0	0	0	0	0	0	0	0	0	10.5	2.5	573.672	S	0	0	0	0	0	0	0	0	0	0	0	0	14	3.5
32B82DB177	51	Male	0	0	0	0	0	14	0	0	0	0	7.07143	1.28571	0	0	1	1	0	0	0	0	0	0	0	0	0	0	0	0	0	0	0	S	0	0	0	0	0	7	1	0	0	0	27.75	3	0	0
A61618BE33	83	Female	16.7229	0	11.7993	1	21	21	21	0	14.4	2.4	40.5	4.82143	2.125	0.625	0	0	0	0	0	0	0	0	0	0	0	0	0	0	14.5	1.5	11.9512	R	0	0	0	0	0	0	0	0	0	0	0	0	0	0
48D0CD2EF1	88	Male	13.6181	1.05	4.97361	0	13	14	14	0	7	2	0	0	6.5	2	4	2	1.5	0	0	0	0	0	0	0	0	0	0	0	5.5	1.5	0	S	0	0	0.166667	0	0	0	0	0	0	0	0	0	14	2
A4D7E2C0D9	72	Male	17.2306	0	0	0	33	33	33	0	0	0	0	0	13	0.5	0	0	3	0	0	0	0	0	0	0	0	0	0	0	0	0	13.8521	R	0	0	0.25	0	0	0	0	0	0	0	0	0	0	0
06D50BC919	86	Male	4.76111	0	0	1	7	1	5	0	0	0	0	0	8.41667	1.41667	3	2	0	0	0	0	0	0	0	0	0	0	0	0	6.5	1.5	0	S	0	0	0	0	0	0	0	0	0	0	0	0	0	0
0C98F25340	96	Female	16.7257	6.91319	6.91319	1	17	13	15	0	12.6	3.8	0	0	8.5	1.5	0	0	4	0	0	0	0	0	0	0	0	0	0	0	2.5	1.5	0	S	0	0	0	0	0	0	0	0	0	0	0	0	0	0
363C183E76	81	Male	9.09722	0	7.96458	1	17	17	17	0	0	0	2.89286	1.60714	0	0	0	0	0	0	0	0	0	0	0	0	0	0	0	0	0	0	7.905	R	0	0	0.333333	0	0	0	0	0	0	0	20.4167	2.91667	0	0
9B4D8BEC19	94	Male	28.366	0	3.74444	0	64	27	74	0	4	2	18.9643	5.46429	8	2.5	8	2	2	0	0	0	0	0	0	0	0	0	0	0	19.5	6.5	86.3551	S	0	0	0.277778	0	0	0	0	0	0	0	20.89	3.7	6.5	2
3DFAA8D1D9	88	Male	10.9556	0	7.57153	0	19	12	20	0	7.4	2.4	17.0357	1.60714	0	0	0	0	0	0	0	0	0	0	0	0	0	0	0	0	0	0	12.1223	R	0	0	0.444444	0	0	0	0	0	0	0	0	0	0	0
F4E5CF7B01	77	Male	247.963	26.6153	117.269	2	356	216	25	0.3	106	20	40.3929	8.57143	75.25	10.25	102	18	11	0	0	0	7.14286	3.57143	0	0	0	0	0	0	42.5	7.5	30.5899	R	0	0	1.22222	0	0	0	0	0	0	0	74.2083	14.9583	72.5	14
2DBD4C6564	47	Male	18.0125	0	2.03681	3	35	25	36	0	9	2	17.6786	1.28571	3.66667	0.666667	0	0	0	0	0	0	0	0	0	0	0	0	0	0	0	0	0	S	0	0	0	0	0	0	0	0	0	0	0	0	11	1
A318DB1E7A	65	Female	7.93125	1.83472	1.83472	0	4	9	9	0	19	3	0	0	5.83333	2.16667	4	2	0	0	0	0	0	0	0	0	0	0	0	0	0	0	0	S	0	0	0	0	0	8.5	3	0	0	0	0	0	2.75	1.25
C10C02781A	81	Male	0	0	0	1	29	44	44	0	0	0	16.7143	1.28571	0	0	0	0	0	0	0	0	0	0	0	0	0	0	0	0	0	0	0	S	0	0	0	0	0	0	0	0	0	0	10.25	2.25	0	0
AB43ACD42E	83	Male	5.43681	0	0	1	29	0	0	0	0	0	0	0	0	0	0	0	0	0	0	0	0	0	0	0	0	0	0	0	7.5	1.5	10.9221	R	0	0	0	0	0	0	0	0	0	0	0	0	11	2
01E3838325	64	Male	4.72569	0	0	0	4	5	5	0	0	0	0	0	0	0	6	1	0	0	0	0	0	0	0	0	0	0	0	0	0	0	0	S	0	0	0	0	0	0	0	0	0	0	3.25	0.75	0	0
1EE1362646	87	Male	84.734	19.3056	35.2438	0	95	40	1	2	26	7	61.0714	12.2143	55	10	47	11	0	0	0	0	0	0	0	0	0	0	0	0	44	10	154.852	S	0	0	0.611111	0	0	0	0	0	0	0	71.25	13.5	79.75	12.75
139906A421	73	Male	29.5465	4.29444	7.11875	2	19	71	71	1.2	6	1	5.14286	1.28571	33	3	0	0	2	0	0	0	25	3.57143	0	0	0	0	0	0	0	0	57.901	S	0	0	0.555556	0	0	0	0	0	0	0	0.5	0.5	6.5	2
EB627C4D26	92	Male	165.341	20.8319	54.091	1	189	368	368	4.8	55.5	14	9.32143	1.60714	52.3333	10.25	30	6	7	0	0	0	67.8571	12.5	0	0	0	0	0	0	15	1	38.8772	S	0	0	2.72222	0	0	0	0	0	0	0	108.917	13.9167	60.75	8.25
7C89EF9900	55	Male	50.8083	0	0	2	8	84	95	0	20.4	2.4	6.75	0.964286	15.6667	1	0	0	1.5	0	0	0	28.5714	8.92857	0	0	0	0	0	0	0	0	31.4059	R	0	0	0.25	0	0	0	0	0	0	0	0	0	53.5	7
670501EEBA	75	Female	12.7799	0	0	0	3	1	23	0	0	0	7.71429	0.964286	6.25	1	7	2	0	0	0	0	0	0	0	0	0	0	0	0	8.5	1.5	16.8841	R	0	0	0	0	0	0	0	0	0	0	0	0	12	3
0FD8F4CEF3	92	Male	0	0	0	1	0	0	1	0	0	0	0	0	0	0	0	0	0	0	0	0	0	0	0	0	0	0	0	0	0	0	0	S	0	0	0	0	0	0	0	0	0	0	0	0	11.25	2.25
01CD955F93	76	Male	14.9764	2.31944	2.31944	1	14	12	0	0	14	3	0	0	7.16667	2.33333	0	0	0	0	0	0	0	0	0	0	0	0	0	0	0	0	10.5695	R	0	0	0.222222	0	0	0	0	0	0	0	21	3	0	0
D325FB1582	70	Female	2.05903	0	0	2	0	3	3	0	0	0	0	0	4.33333	1.33333	0	0	0	0	0	0	0	0	0	0	0	0	0	0	0	0	0	S	0	0	0	0	0	0	0	0	0	0	0	0	0	0
1127C6728F	85	Male	36.85	4.60694	4.60694	1	70	56	56	0	8.4	2.4	0	0	44.1667	7.16667	8	4	0	0	0	0	0	0	0	0	0	0	0	0	6	1	96.908	S	0	0	0.833333	0	0	2.75	0.75	0	0	0	0	0	0	0
5778A36334	83	Female	0	0	0	0	36	0	2	0	0	0	0	0	0	0	0	0	0	0	0	0	0	0	0	0	0	0	0	0	0	0	10.7867	R	0	0	0	0	0	0	0	0	0	0	0	0	0	0
9A44524E17	83	Male	17.7174	0	0	2	22	20	22	0	0	0	0	0	4	0.666667	7	2	3	0	0	0	0	0	0	0	0	0	0	0	11.5	1.5	13.6946	R	0	0	0	0	0	0	0	0	0	0	19.5	3	0	0
F1CC035D17	78	Male	7.87847	1.08333	1.08333	1	19	19	19	0	0	0	8.03571	1.28571	8.75	2.25	0	0	2	0	0	0	0	0	0	0	0	0	0	0	0	0	11.8459	R	0	0	0.388889	0	0	0	0	0	0	0	6.83333	3.58333	0	0
6CB69D4976	78	Female	16.9785	4.03542	4.03542	1	24	25	25	0	28	4	0	0	12.3333	1.33333	0	0	0	0	0	0	10.7143	1.78571	0	0	0	0	0	0	2.5	1.5	27.3433	S	0	0	0	0	0	0	0	0	0	0	11.5	5.5	12	1.5
C90B47187F	46	Male	24.9396	8.88194	16.0312	17	95	21	27	0	13.8	4.8	13.5	4.5	29.25	3.25	0	0	0	0	0	0	39.2857	10.7143	0	0	0	0	0	0	16	4	1145.99	S	0	0	0	0	0	0	0	0	0	0	0	0	3.5	2
FE6958CF43	88	Male	49.0868	0	0	0	143	36	150	1.2	17	2	0	0	24	1.5	15	6	0	11.7333	0	0	0	0	0	0	0	0	0	0	0	0	55.689	S	0	0	3.33333	0	0	0	0	0	0	0	5.41667	2.41667	71.5	6
EE2BFA5BBA	84	Female	56.0542	0	0	1	149	159	169	0	0	0	3.85714	0.964286	61.8333	4.33333	12	2	0	0	0	0	0	0	0	0	0	0	0	0	0	0	1318.68	S	35.7333	0	0.583333	0	0	0	0	0	0	0	0	0	35.5	4
89D17EC7F5	82	Male	59.3444	10.8583	10.8583	1	71	105	88	0	31	4.5	0	0	15.6667	0.666667	0	0	0	0	0	0	14.2857	3.57143	0	0	0	0	0	0	0	0	18.7328	R	0	0	0.25	0	0	0	0	0	0	0	80.75	6.08333	0	0
1DB70FF914	60	Male	39.3938	0	16.6271	0	30	19	30	0	32.4	4.4	0	0	1.66667	1.66667	7	2	0	0	0	0	0	0	0	0	0	0	0	0	0	0	7.72251	R	0	0	0.305556	0	0	0	0	0	0	0	24.5833	3.33333	21.5	2
FA8DE52B61	53	Male	10.8889	0	0	2	25	9	12	0	0	0	6.10714	1.28571	0	0	0	0	0	0	0	0	0	0	0	0	0	0	0	0	0	0	0	S	0	0	0	24.6667	2.66667	0	0	0	0	0	0	0	11	2
5EB7770865	76	Male	20.1514	8.23611	12.2174	1	10	12	18	0	21.4	5.4	0	0	10.1667	1.83333	0	0	0	0	0	0	0	0	0	0	0	0	0	0	11	1	12.4363	S	0	0	0.333333	0	0	0	0	0	0	0	0	0	12.5	2
2EE865D856	76	Male	26.2215	6.01319	6.01319	0	58	74	74	0	24.4	3.4	0	0	24.5	2	0	0	0	0	0	0	0	0	0	0	0	0	0	0	0	0	5.6263	R	0	0	0.111111	0	0	0	0	0	0	0	0	0	22.5	1.5
9D909F711F	76	Male	1.18819	0	0	4	5	12	12	0	0	0	0	0	13.3333	2.33333	0	0	0	0	0	0	0	0	0	0	0	0	0	0	0	0	13.416	R	0	0	0.25	0	0	0	0	0	0	0	0	0	5.5	3.5
7E6AABE521	53	Male	2.49653	0	0	0	11	11	11	0	0	0	0	0	0	0	0	0	0	0	0	0	0	0	0	0	0	0	0	0	0	0	0	S	0	0	0.222222	0	0	0	0	0	0	0	6.25	0.75	0	0
C81A094ACE	76	Male	0	0	0	0	8	4	8	0	0	0	0	0	0	0	0	0	0	0	0	0	0	0	0	0	0	0	0	0	0	0	0	S	0	0	0	0	0	0	0	0	0	0	0	0	14.5	2.5
63B92862EE	58	Male	0	0	0	1	3	0	3	0	0	0	0	0	3.25	1.25	0	0	0	0	0	0	0	0	0	0	0	0	0	0	0	0	0	S	0	0	0	0	0	0	0	0	0	0	0	0	0	0
0A43D8F0C7	79	Male	69.5958	8.87361	16.7569	0	79	43	121	5.3	16	4	44.6786	2.25	10.3333	1.33333	34	2	2	0	0	0	33.9286	3.57143	0	0	0	0	0	0	0	0	29.6062	R	0	0	0.805556	0	0	9.75	0.75	0	0	6	0	0	0	0
265F212B52	86	Male	40.6319	0	34.8271	0	0	43	0	0	11.4	2.4	0	0	7.83333	1.83333	20	4	0	1	0	0	25	3.57143	0	0	0	0	0	0	18.5	5.5	2.72784	R	0	0	0	0	0	0	0	0	0	0	28	4	24.5	2
824F5B88A4	76	Male	35.9097	1.07778	48.8125	0	32	32	32	0	20	2	3.22143	1.29286	18.8333	4.58333	6	2	2	0	0	0	0	0	0	0	0	0	0	0	0	0	40.6859	R	0	0	0.555556	0	0	4	1	0	0	0	0	0	31.5	3.5
DFBABA4580	88	Male	21.1021	0	0	1	222	6	43	0	0	0	12.8571	1.28571	18.75	2.25	0	0	0	0	0	0	0	0	0	0	0	0	0	0	27	5	48.9005	R	0	0	0	0	0	0	0	0	0	0	7.5	1.5	22.5	1.5
0229350A22	74	Male	0	0	0	1	0	5	16	0	0	0	7.71429	0.964286	0	0	0	0	0	0	0	0	0	0	0	0	0	0	0	0	0	0	0	S	0	0	0	0	0	0	0	0	0	0	0	0	0	0
576C733911	75	Female	15.7799	0	0	0	0	273	96	0	0	0	9.96429	1.28571	59.9167	11.9167	20	4	0	0	0	0	0	0	0	0	0	0	0	0	9	1	50.7742	S	0	0	0.305556	0	0	0	0	0	0	0	8.5	1.5	7.5	1.5
6BC2852A42	94	Female	100.958	1.89167	25.141	1	92	55	6	0	62.6	16.6	26.5179	4.98214	16.5833	2.08333	3.5	1.5	0	0	0	0	0	0	0	0	9.25	1	0	0	0	0	72.9713	S	0	0	0	0	0	1	1	0	0	0	15	1.66667	40.5	10
E8E6C746D6	51	Male	0	0	0	2	46	84	84	0	0	0	27.3214	1.28571	0	0	0	0	0	0	0	0	0	0	0	0	0	0	0	0	0	0	0	S	0	0	0	0	0	0	0	0	0	0	0	0	0	0
B286A373EA	70	Male	40.1319	3.09306	8.97639	0	26	36	40	0	16.4	2.4	0	0	14.4167	3.08333	0	0	0	0	0	0	0	0	0	0	0	0	0	0	2.5	1.5	16.9293	R	0	0	0.277778	0	0	0	0	0	0	0	11.25	1.25	24.5	6.5
7015878EC5	58	Male	11.7882	0	0	0	27	14	35	0	0	0	0	0	6.16667	0.666667	0	0	0	0	0	0	0	0	3	2	0	0	0	0	13.5	1.5	3.89347	R	0	0	0	0	0	0.166667	0.166667	0	0	0	0	0	36.5	6.5
FFCBCCD2CB	97	Male	1.10069	0	0	0	1	6	6	0	3.4	2.4	2.57143	1.60714	3.5	2.75	0	0	0	0	0	0	0	0	0	0	0	0	0	0	0	0	0	S	0	0	0.166667	0	0	0	0	0	0	0	0	0	0	0
B55D3B9194	93	Female	10.5403	0	3	0	14	14	14	0	0	0	6.10714	1.28571	6.33333	1.83333	0	0	2	0	0	0	3.57143	3.57143	0	0	0	0	0	0	13.5	2.5	0	S	0	0	0	0	0	0	0	0	0	0	0	0	0	0
8219B86ABC	97	Female	33.2701	15.7771	21.6361	0	43	47	0	0	36.9	7.9	4.82143	1.92857	17.75	4.25	0	0	0	0	0	0	0	0	0	0	0	0	0	0	12	4	31.94	R	0	0	3.0303	0	0	0	0	0	0	0	43.4167	9.41667	11.25	3.75
FB00CA1232	94	Female	10.8618	0	0	0	25	24	24	0	0	0	0.964286	0.964286	16	2	0	0	0	0	0	0	0	0	0	0	0	0	0	0	4	1	17.8889	R	0	0	0.222222	0	0	0	0	0	0	0	0	0	14	6.5
4BF15080A6	92	Female	4.06736	1.63333	2.81736	1	9	4	0	0	5.4	2.4	0	0	1.5	0.5	0	0	0	0	0	0	0	0	0	0	0	0	0	0	4	1	0	S	0	0	0	0	0	0	0	0	0	0	4.16667	1.66667	3	1
33C0353FDD	76	Male	32.4694	0	0	2	11	45	42	0	0	0	0	0	46.1667	6.16667	8	2	0	0	0	0	0	0	0	0	0	0	0	0	19.5	2.5	18.2734	R	0	0	0	0	0	1.25	1.25	0	0	0	55.5	10.5	0	0
FDFD6998B5	96	Male	15.8361	0	0	0	16	16	16	0	8	6	0	0	6.16667	1.66667	3	2	0	0	0	0	0	0	0	0	0	0	0	0	8.5	1.5	18.8308	R	0	0	0	0	0	0	0	0	0	0	0	0	9.5	1.5
E2DBB25AE1	87	Male	56.3139	0	0	0	154	249	0	0	8.4	2.4	0	0	40.75	5.5	73	17	0	36	0	0	0	0	0	0	0	0	0	0	27	4	11.5519	R	0	0	0	0	0	0	0	0	0	0	0	0	0	0
4E13B92A20	98	Male	44.1319	17.0799	39.7667	0	42	14	62	0	53.8	11.4	5.14286	1.60714	19	4.75	4	1.5	0	0	0	0	0	0	0	0	0	0	0	0	0	0	63.6504	S	0	0	0.222222	0	0	0	0	0	0	0	12.9167	1.25	22	4
E34CEF9E01	92	Male	137.376	0	5.84861	0	343	385	373	7.2	0	0	61.7143	10.2857	85.6667	11.6667	71	16	6.5	0	0	0	4.46429	0.892857	0	0	0	0	0	0	61.5	12.5	210.725	R	0	0	0.722222	0	0	5.5	1.5	0	0	0	95.25	14.25	158.25	22.25
5980EB2905	91	Female	18.4069	0	2.05	1	63	0	63	0	0	0	16.3929	2.89286	19.3333	3.08333	0	0	0	0	0	0	0	0	0	0	0	0	0	0	29.5	2.5	24.8296	R	0	0	0.111111	0	0	0	0	0	0	0	0	0	0	0
2185F2241F	98	Female	4.74444	0	0	0	0	0	50	0	0	0	4.17857	1.28571	0	0	10	2	0	0	0	0	0	0	0	0	0	0	0	0	6.5	1.5	0	S	0	0	0	0	0	0	0	0	0	0	0	0	26	6
C32887E38F	94	Male	132.326	14.2833	14.2833	4	352	50	0	0	10.5	3	20.8929	7.39286	112.25	16.75	40	7	4.5	0	0	0	0	0	0	0	0	0	0	0	88.5	15.5	8.9759	R	0	0	0.333333	0	0	0	0	0	0	0	289.25	51.75	91.25	12.25
BDAD276322	98	Female	25.491	0	9.18889	0	0	19	19	0	19.4	4.4	13.5	0.964286	0	0	0	0	0	0	0	0	0	0	0	0	0	0	0	0	22	3	4.31582	R	0	0	0	0	0	0	0	0	0	0	0	0	0	0
59F9EC4FC1	89	Male	29.266	13.6083	18.6493	0	38	32	0	0	0	0	0	0	11	2	0	0	1	0	0	0	0	0	0	0	0	0	0	0	3	1	23.8112	R	0	0	0.277778	0	0	0	0	0	0	0	7	2	21.25	5.25
9E4E1DD552	94	Female	94.4479	26.8792	33.6111	1	145	85	118	1.2	31.8	6.8	0	0	34	5	12	3.5	0	0	0	0	0	0	0	0	0	0	0	0	47	6	62.8645	R	0	0	2.9697	0	0	0	0	0	0	0	114.083	19.5833	18.75	4.75
4E1428AE54	86	Female	0	0	0	0	0	0	21	0	0	0	0	0	0	0	0	0	0	0	0	0	0	0	0	0	0	0	0	0	0	0	4.31953	R	0	0	0	0	0	0	0	0	0	0	0	0	0	0
D82EA465DD	94	Male	58.3472	20.4104	55.4854	0	56	17	35	0	29	3	0	0	13.125	3.375	7	2	2	0	0	0	0	0	0	0	0	0	0	0	8.5	1.5	51.7461	R	0	0	0.222222	0	0	0	0	0	0	16	17.7633	3.38667	30.25	4.75
4E6FA2D799	92	Male	48.0882	6.02708	12.1674	0	49	44	0	0	24.8	5.8	23.1429	3.85714	6.16667	1.16667	0	0	1.5	0	0	0	0	0	0	0	0	0	0	0	7.5	1.5	22.713	S	0	0	0.722222	0	0	0	0	0	0	0	32.6667	10.6667	10.75	1.75
2232B47D65	94	Male	366.1	28.8375	129.222	0	465	537	553	2.4	54	10	6.75	0.964286	118.917	17.4167	77.5	16.5	11	0	0	0	0	0	0	0	0	0	0	0	104.5	14.5	43.9697	R	0	9.8125	1.44444	0	0	0	0	0	0	0	323.5	51.25	169	25.5
E597200E19	85	Male	14.5097	0	0	1	12	8	0	0	0	0	13.1786	3.85714	3	0.75	0	0	0	0	0	0	0	0	0	0	0	0	0	0	20	4	47.3781	R	0	0	0	0	0	0	0	0	0	0	0	0	4.5	1.5
69B938CFED	96	Female	361.039	17.9444	153.422	2	725	1197	1259	7.36667	150.4	15.4	0	0	49.3333	6.25	32	4.5	0	8	0	0	67.8571	14.2857	0	0	0	0	0	0	109.5	19.5	3.9188	R	0	1.375	4.70707	0	0	16.125	3.125	0	0	0	566.208	79.6667	228.75	33.75
78DB8F644B	83	Female	25.6146	0	0	0	9	8	627	0	0	0	1.92857	1.92857	35.25	5.75	148	30	0	0	0	0	0	0	0	0	0	0	0	0	45.5	6.5	1358.89	S	0	0	0	0	0	7.75	0.75	0	0	0	16	3	10.25	4.25
56C564F8B1	93	Male	20.8104	1.69514	1.69514	0	70	1165	752	0	0	0	0	0	34.3333	4.83333	0	0	4	0	0	0	0	0	4.00267	2.00267	0	0	0	0	9.5	2.5	42.9716	S	0	0	0	0	0	0	0	0	0	0	123.875	25.125	170	28
2DB7AD5775	86	Male	0	0	3.09861	0	2	2	2	0.0666667	3	1	0	0	0	0	0	0	3	0	0	0	0	0	0	0	0	0	0	0	3	1	2.98354	R	0	0	0	0	0	0	0	0	0	0	0	0	4.5	1.5
4B38CEA77F	95	Male	23.9792	0	0	1	315	33	315	0	0	0	0	0	20.25	2.58333	0	0	0	0	0	0	0	0	0	0	0	0	0	0	19	3	90.9153	R	0	0	0	0	0	0	0	0	0	0	69.375	13.375	33.25	7.25
D4E624DC23	94	Male	56.3229	6.47639	39.4569	0	44	33	51	0	29.4	4.4	14.183	2.61161	7.25	1.25	0	0	0	0	0	0	7.14286	2.67857	0	0	0	0	0	0	23.5	5.5	20.4022	R	0	0	1.11111	0	0	0	0	0	0	0	37.5967	3.22	0	0
F25FD1624F	88	Female	4.24167	0	2.42083	0	4	4	4	0	0	0	0	0	0	0	0	0	2	2.4	0	0	0	0	0	0	0	0	0	0	0	0	2.7603	R	0	0	0	0	0	0	0	0	0	0	0	0	5	1
603CCD893B	93	Male	53.291	0	115.074	0	51	68	69	0	51.4	4.4	24.1071	3.85714	0	0	0	0	0	20	0	0	14.2857	8.03571	0	0	0	0	0	0	21	3.5	4.67955	R	0	0	0.222222	37.3333	1.33333	0	0	0	0	0	16.37	3.54333	23	6.5
1EFF48A2D5	46	Male	7.83333	0	0	1	0	0	0	0	0	0	0	0	15.5	2.75	3	2	0	0	0	0	0	0	0	0	0	0	0	0	0	0	7.84541	R	0	0	0	0	0	0	0	0	0	0	0	0	0	0
9C2AEF4442	65	Male	4.94306	0	0	5	9	5	9	0	0	0	6.75	0.964286	0	0	0	0	0	0	0	0	0	0	0	0	0	0	0	0	6.5	1.5	3.95844	R	0	0	0	0	0	0	0	0	0	0	0	0	0	0
8A4232DB28	20	Male	13.9208	0	0	0	21	21	21	0	0	0	7.71429	1.92857	0	0	10	1	0	0	0	0	0	0	0	0	0	0	0	0	0	0	0	S	0	0	0	0	0	0	0	0	0	0	34.5	5.25	0	0
83419C5EE5	79	Female	0	0	0	0	25	30	30	0	0	0	28.6071	1.60714	0	0	0	0	0	0	0	0	0	0	0	0	0	0	0	0	0	0	16.5122	R	0	0	0	0	0	0	0	0	0	0	0	0	0	0
291BEF3EE4	49	Female	5.36806	0	0	0	8	8	8	0	0	0	7.71429	2.57143	1.25	0.75	0	0	0	0	0	0	0	0	0	0	0	0	0	0	8	2	9.89418	R	0	0	0	0	0	0	0	0	0	0	0	0	0	0
A3567D9EBC	98	Male	9.89306	6.10486	6.10486	1	25	16	16	0	0	0	0	0	9.25	1.75	0	0	0	0	0	0	0	0	0	0	0	0	0	0	7.5	1.5	0	S	0	0	0.222222	0	0	0	0	0	0	0	0	0	0	0
722F8DA418	57	Female	8.81667	2.81667	2.81667	0	11	0	13	0	0	0	0	0	5	0.5	0	0	1	0	0	0	0	0	0	0	0	0	0	0	7	1	6.91889	R	0	0	0.277778	0	0	0	0	0	0	0	0	0	0	0
C2E109E793	86	Male	37.6771	0	34.059	0	34	34	34	0	24	2	4.17857	1.60714	3.91667	2.41667	5	1	4	0	0	0	23.2143	3.57143	0	0	0	0	0	0	1.5	1.5	14.8291	S	0	0	0.388889	0	0	6	1.5	0	0	0	8.33333	2.08333	14.5	4
08FFCACD76	74	Male	24.4715	23.6153	23.6153	3	28	34	34	0	20	6	8.03571	1.28571	29.6667	3.66667	0	0	4	0	0	0	0	0	0	0	0	0	0	0	12.5	1.5	0	S	0	0	0.222222	0	0	0	0	0	0	0	0	0	9.5	4
97185D4192	45	Male	2.97569	0	0	0	0	17	65	0	0	0	0	0	0	0	14	2	0	0	0	0	0	0	0	0	0	0	0	0	0	0	0	S	7.06667	0	0	0	0	0	0	0	0	0	20.5	5	0	0
5AB321F1C0	77	Male	7.69236	0	0	0	0	4	27	0	0	0	10.9286	1.28571	9.5	1.25	7	2	4	0	0	0	0	0	0	0	0	0	0	0	0	0	2.87957	R	0	0	0	0	0	0	0	0	0	0	0	0	0	0
0AF080B7AF	88	Male	14.2285	5.7	9.65625	0	17	15	15	0	12.4	2.4	0	0	4.75	0.75	0	0	1.5	0	0	0	0	0	0	0	0	0	0	0	3.5	1.5	14.576	R	0	0	0	0	0	0	0	0	0	0	0	0	8	2
2D48B932C8	91	Male	51.4826	3.55833	55.816	0	38	4	0	0	62.9	12.9	0	0	4	1	0	0	3	0	0	0	0	0	0	0	0	0	0	0	0	0	22.7686	R	0	0	0.444444	0	0	0	0	0	0	0	25.8333	4.58333	16.5	3
875865A27C	54	Male	0	0	0	1	78	16	24	0	0	0	28.9286	4.82143	12.5	1.5	0	0	0	0	0	0	0	0	0	0	0	0	0	0	0	0	0	S	0	0	0	0	0	0.166667	0.166667	0	0	0	8	1	0	0
B883674A57	70	Male	79.8167	35.7632	39.9014	0	92	31	122	0	43	10	17.6786	2.57143	20	2.5	0	0	6.5	0	0	0	0	0	0	0	0	0	0	0	42	9	11.8678	R	0	0	1.90404	0	0	0	0	0	0	0	0	0	49.25	6.25
9D0A3B4260	22	Male	13.8181	0	0	0	5	15	12	3.6	0	0	10.9286	1.28571	0	0	0	0	0	0	0	0	0	0	0	0	0	0	0	0	0	0	3.80219	R	0	0	0	0	0	0	0	0	0	0	9.5	2.75	0	0
8C9E9BA98F	69	Female	62.3799	0	19.4403	0	48	33	48	0	28	8	0	0	12.8333	2.16667	0	0	0	0	0	0	0	0	0	0	0	0	0	0	18.5	3.5	15.6671	R	0	0	0	0	0	0	0	0	0	0	68.25	5.25	10.25	4.25
60EC569DB5	57	Male	5.97569	3.05625	3.05625	0	3	7	7	2.4	8	1	0	0	6	1.5	0	0	3	0	0	0	0	0	0	0	0	0	0	0	3	1	0	S	0	0	0.166667	0	0	0	0	0	0	0	9.75	3	0	0
91E5E04871	84	Male	19.5979	0	0	0	21	21	22	0	22.4	2.4	0	0	5.5	0.833333	0	0	0	0	0	0	0	0	0	0	0	0	0	0	0	0	0	S	0	0	0	0	0	0	0	0	0	0	0	0	22.5	1.5
F7136762AA	75	Male	6.11458	0	0	1	5	25	0	2.4	0	0	0	0	29	4	0	0	0	0	0	0	0	0	0	0	0	0	0	0	5.5	1.5	24.8486	R	0	0	0	0	0	0	0	0	0	0	0	0	5	2
8E92FAE31E	73	Female	0	0	0	1	2	7	55	0	0	0	15.75	1.28571	4.75	1	0	0	0	0	0	0	0	0	0	0	0	0	0	0	0	0	4.22059	R	0	0	0	0	0	0.833333	0.166667	0	0	0	23.25	7.5	0	0
15A846916D	83	Male	35.7597	11.6736	11.6736	0	15	15	0	0	15.5	2.5	16.7143	3.53571	11	1.75	11	1	0	0	0	0	0	0	0	0	0	0	0	0	9	2	12.7109	R	0	0	0	0	0	0	0	0	0	0	0	0	17	5
0E7D2CA44C	82	Female	132.56	16.9437	29.741	0	273	914	937	1.2	83.5	24.5	87.75	14.1429	62.9167	9.58333	15	5	6	0	0	0	0	0	0	0	0	0	0	0	117.5	18.5	65.9042	R	0	0	0.166667	0	0	0	0	0	0	0	22.5	2.25	218.5	38
DBCA7D409B	58	Male	25.0799	19.5646	46.4535	0	17	18	0	2.4	34	5.3	0	0	27.5	7.5	0	0	18.5	0	0	0	0	0	0	0	0	0	0	0	5.5	2.5	0	S	0	1.125	0.666667	0	0	0	0	0	0	2	0	0	8	2
A0CFBCE1B9	81	Male	1.96111	0	1.01944	0	8	8	8	0	2.4	2.4	1.92857	0.964286	6.5	3	2	1.5	0	0	0	0	0	0	0	0	0	0	0	0	5.5	2.5	0	S	0	0	0.5	0	0	0	0	0	0	0	0	0	0	0
D9CC086F3C	90	Male	6.60208	4.85069	7.17847	0	8	8	8	0	8.4	4.4	0	0	5.33333	1.33333	4	2	0	1.06667	0	0	16.0714	3.57143	0	0	0	0	0	0	0	0	6.61499	R	0	0	0.222222	0	0	2	1	0	0	0	0	0	4.5	2.5
C1F31916C7	90	Female	13.6437	0	0	0	319	0	345	0	20	6	12.5357	0.964286	4.66667	1.16667	0	0	3	0	0	0	0	0	0	0	0	0	0	0	14	1	62.6043	S	0	0	0	0	0	0	0	0	0	0	34	5	52	7
A695D4BB47	98	Male	44.9729	10.3535	18.141	1	47	75	7	0	12.4	4.4	5.46429	1.60714	25.9167	2.91667	12	3	0	0	0	0	0	0	0	0	0	0	0	0	19.5	2.5	7.67634	R	0	0	0.611111	0	0	0	0	0	0	0	49.25	7.25	0	0
FFAA22E084	95	Male	8.97639	3.80764	7.27847	1	17	17	17	0	0	0	9.96429	3.85714	9.75	1.5	0	0	0	0	0	0	0	0	0	0	0	0	0	0	4	1	9.91392	R	0	0	0.111111	0	0	0	0	0	0	0	0	0	0	0
4B9E550F9E	99	Male	13.9722	0	0	1	23	1	17	0	3.4	2.4	0	0	8.5	1.75	0	0	3	0	0	0	0	0	0	0	0	0	0	0	0	0	15.9195	R	0	0	0	0	0	0	0	0	0	0	0	0	13.5	1.5
B1FA829A65	91	Male	59.9625	1.00278	13.0139	0	60	48	73	0	28.5	4.5	5.46429	1.60714	12	2	0	0	0	0	0	0	0	0	0	0	0	0	0	0	31.5	4.5	16.9521	R	0	0	0.666667	0	0	0	0	0	0	0	33.75	4.75	7.75	1.75
321B3D75FC	96	Male	46.3014	0	0	0	324	367	367	0	0	0	0	0	87.0833	11.3333	12	2	0	0	0	0	0	0	0	0	0	0	0	0	23	4	3.72413	S	0	0	0.333333	0	0	0.75	0.25	0	0	0	90.5417	12.0417	35.5	4
5C93E6F99C	92	Male	163.278	22.525	48.1604	1	120	217	231	0	30.4	5.4	36	9.32143	41.8333	4.58333	32	8	1.5	0	0	0	14.2857	3.57143	0	0	0	0	0	0	67.5	11.5	94.9782	S	0	0	1.05556	0	0	0	0	0	0	0	59.7083	10.9583	68.75	10.25
E307B893DC	99	Male	7.94306	0	0	0	8	8	8	0	0	0	0	0	4.66667	0.666667	0	0	0	0	0	0	0	0	0	0	0	0	0	0	8	1	2.67292	R	0	0	0.222222	0	0	0	0	0	0	0	0	0	0	0
4E462DE535	102	Male	41.5375	29.9174	59.5819	0	54	55	38	0	40.9	8.9	18.6429	3.21429	18.1667	3.41667	14	4	0	0	0	0	16.0714	7.14286	0	0	0	0	0	0	0	0	12.7386	R	0	0	0.222222	0	0	0	0	0	0	0	38.75	6.25	10.5	4.5
53CB9B1085	96	Male	53.8	0	3.76111	0	135	99	94	0.369492	6.4	2.4	14.4643	0.964286	6.16667	1	29.0833	5.58333	0	0	0	0	0	0	0	0	0	0	0	0	26	4	16.3427	S	0	0	0.444444	0	0	0	0	0	0	0	33.625	6.125	100.75	13.75
59D6643834	97	Male	36.591	0	26.5875	0	54	54	6	0	48.2	12.2	5.14286	1.28571	7.5	1	0	0	0	0	0	0	50	8.92857	0	0	0	0	0	0	16	3	9.93199	R	0	0	1.27778	0	0	0	0	0	0	0	25.8333	3.33333	11	3.5
034BA8B860	79	Male	36.809	12.8375	30.8451	0	15	30	30	0	18.4	3.4	1.92857	0.642857	14.25	2.66667	0	0	3	2	0	0	10.7143	3.57143	0	0	0	0	0	0	15.5	3.5	12.9741	S	0	0	1.94444	0	0	0	0	0	0	0	11.25	2.70833	0	0
E00B261AC2	100	Male	51.984	33.0021	53.5903	0	44	44	44	3	36.9	4.9	0	0	31	5.25	0	0	0	0	0	0	42.8571	17.8571	0	0	0	0	0	0	0	0	51.0195	S	0	1.5	1.22222	0	0	0	0	0	0	0	46.125	12.125	0	0
6A7ACD5CE9	99	Male	24.9306	1.52986	1.52986	0	35	15	35	0	0	0	13.1786	3.21429	9.75	2.66667	15.6667	6.66667	0	0	0	0	0	0	0	0	0	0	0	0	19.5	3.5	0	S	0	0	0.444444	0	0	0	0	0	0	0	0	0	6.5	1.5
7263FD6E9A	88	Male	23.8111	7.94097	14.5312	0	94	96	96	4.8	18.4	3.4	9.64286	0.964286	11.5	2	4.125	3.625	5	0	0	0	0	0	0	0	0	0	0	0	2	1	3.46134	R	0	0	0.888889	0	0	0	0	0	0	0	0	0	51.5	7.5
3F4803C140	91	Male	8.00625	8.00625	10.0597	0	6	10	6	0	9	3	0	0	4.66667	0.666667	0	0	2	0	0	0	0	0	0	0	0	0	0	0	7.5	1.5	13.3484	R	0	0	0.111111	0	0	0	0	0	0	0	0	0	0	0
622568F04A	91	Male	412.799	102.023	272.445	3	483	989	125	2.8	126.4	25.4	66.8571	14.4643	173.083	24.8333	26.1667	9.16667	6	0	0	0	23.2143	6.25	0	0	16.5	1.5	0	0	130.5	22.5	72.9411	R	0	0	14.4116	0	0	0	0	0	0	0	322.6	38.7017	99.5	11.5
5A32D3A7D0	95	Male	117.97	34.5333	60.375	2	40	256	262	0.4	73	12.25	40.1786	4.5	47.8333	5.66667	14	5	0	0	0	0	16.0714	3.57143	0	0	0	0	0	0	10.5	1.5	63.9537	R	0	0.75	3.39394	0	0	0	0	0	0	0	102.247	12.82	0	0
150676BC76	91	Male	17.5208	0	0	0	19	19	19	0	0	0	0	0	13.25	2	0	0	0	0	0	0	0	0	0	0	0	0	0	0	22.5	3.5	0	S	0	0	0	0	0	0	0	0	0	0	11.625	2.625	0	0
185995EF56	91	Male	102.927	4.92847	27.2063	1	116	91	126	0.8	38.8	5.8	0	0	32.6667	4.91667	7	2	0	0	0	0	0	0	0	0	0	0	0	0	25.5	4.5	338.726	R	0	0	1.72222	0	0	0	0	0	0	0	47.75	5.08333	0	0
FCAD538BE6	98	Female	0	0	0	0	30	30	30	0	0	0	0	0	0	0	0	0	0	0	0	0	0	0	0	0	0	0	0	0	0	0	5.83037	R	0	0	0	0	0	0	0	0	0	0	11.25	2.08333	19.5	2.5
361388A465	96	Male	41.0778	32.8486	32.8486	8	73	30	0	0	19.4	2.4	6.75	0.964286	30.3333	1.83333	0	0	0	0	0	0	5.35714	3.57143	0	0	0	0	0	0	0	0	172.626	R	0	0	0.694444	0	0	0	0	0	0	0	10.4167	1.66667	0	0
7AABDE4E7E	98	Male	0	0	0	0	0	51	51	0	0	0	4.5	1.60714	9.16667	1.66667	0	0	0	0	0	0	0	0	0	0	0	0	0	0	0	0	3.76193	R	0	0	0	0	0	0	0	0	0	0	0	0	0	0
2D36B9E6AB	102	Male	12.8604	0	0	0	18	19	19	0	0	0	0	0	3.66667	1.66667	0	0	0	0	0	0	0	0	0	0	0	0	0	0	13.5	2.5	26.8913	R	0	0	0.166667	0	0	0	0	0	0	0	0	0	24.5	2
Notes: NSP, Number of surgical procedures; CVC-days, duration of central venous catheterization; MV-days, duration of mechanical ventilation; UC-days, duration of urinary catheterization; TFC-CRPA, time to first CRPA detection after ICU admission; IPA-CARBSUSC, Initial PA isolate carbapenem susceptibility; DAMT, duration of dual antimicrobial therapy; CAMT, duration of ≥3 antimicrobial combinatio…
