# Supplementary material for: A Hybrid AutoML Ensemble Integrating Conventional Learners and Gradient-Boosting Models for Multi-Outcome Prediction in ICU Patients with Pseudomonas aeruginosa
Source: Research Square preprint supplement (doi:10.21203/rs.3.rs-7125109/v1), 2025-07-23
Supplement: Supplementary file 3 [file f86d8f264495ff3fef23b49b.pdf]

(a)

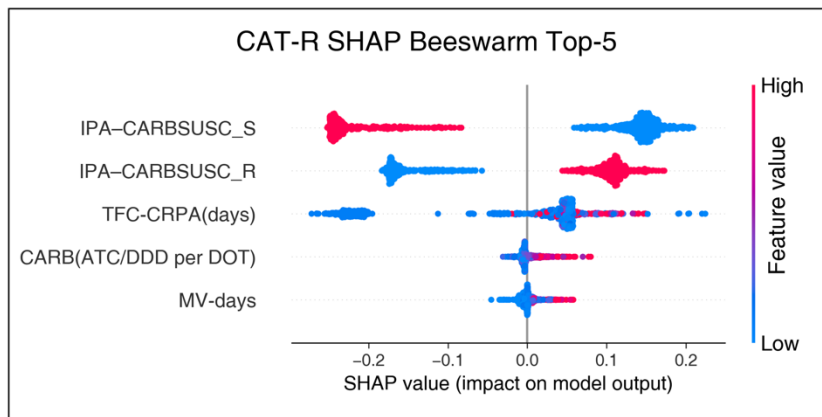

(b)

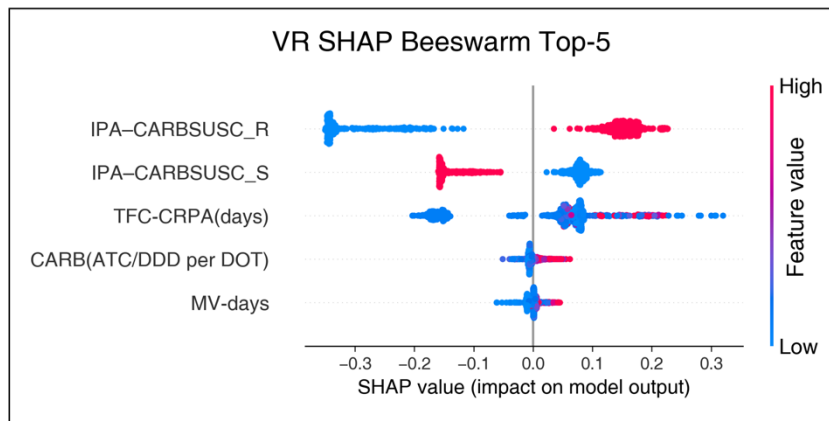

(c)

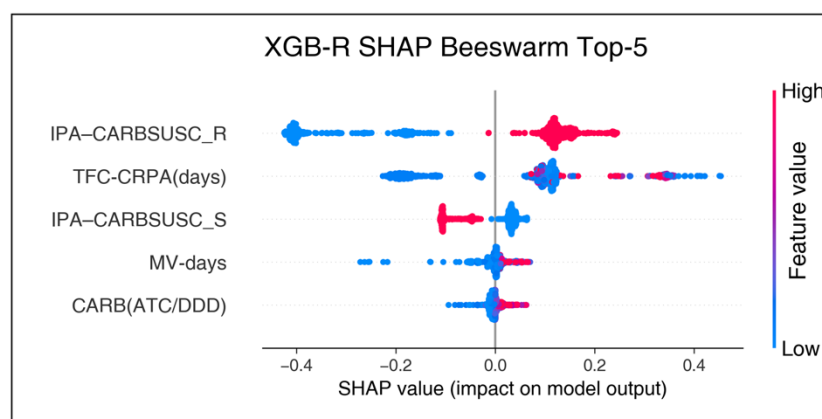

(d)

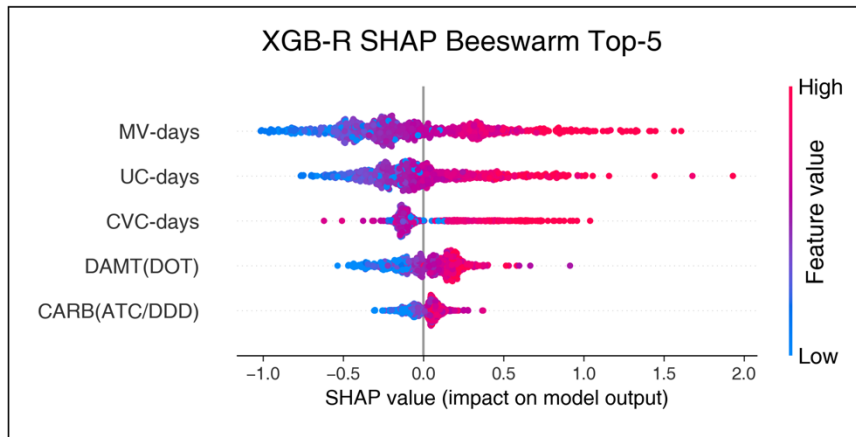

(e)

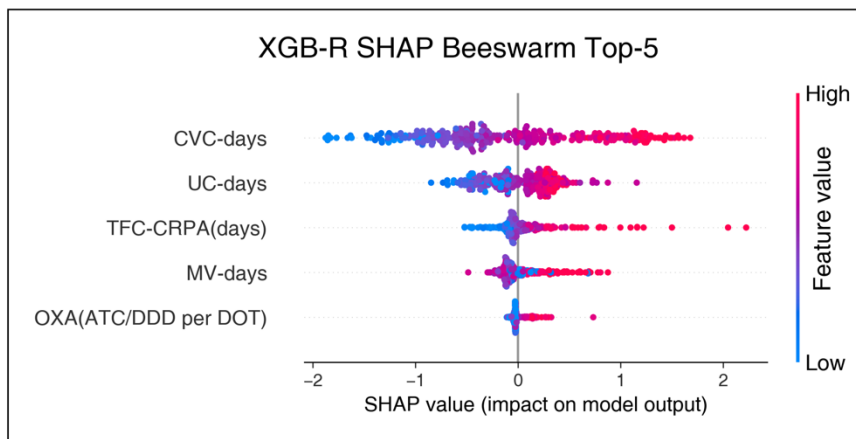

**Fig. S6 Global SHAP beeswarm plots for four regression outcomes.**

(a) CAT-R model for CRR; (b) VR model for CRR; (c) XGB-R model for CRR-PA-Last2; (d) XGB-R model for ICU-LOS; (e) XGB-R model for ICU-Death interval. Each plot shows the top 10 most influential predictors ranked by the mean absolute SHAP value ( $|\text{SHAP}|$ ). Each dot represents an individual SHAP value, with the color encoding the normalized feature value (blue = low, red = high). Positive SHAP values indicate a higher predicted risk, whereas negative values indicate protective effects. The SHAP values for all remaining features are close to zero.
