# Supplementary material for: A Hybrid AutoML Ensemble Integrating Conventional Learners and Gradient-Boosting Models for Multi-Outcome Prediction in ICU Patients with Pseudomonas aeruginosa
Source: Research Square preprint supplement (doi:10.21203/rs.3.rs-7125109/v1), 2025-07-23
Supplement: Supplementary file 4 [file e8f42b145f17247c2127af59.xlsx]

## Sheet:  Supplementary Table S4
Table S4. Average prediction time of classification and regression models.
Task	Model	Average Prediction Time (ms)
Classification	LR-C	3.8
	GBDT	6.5
	XGB-C	8.8
	LGB-C	12.3
	CAT-C	14.1
	RF-C	61.8
	VC	46.4
	SC	45.5
	BC	719.3
Regression	GBRT	4.3
	XGB-R	7.6
	CAT-R	8
	LGB-R	8.9
	RF-R	61.7
	VR	40.8
	SR	37
	BR	596.9
